# Supplementary material for: Comparison of RNA-Seq and Microarray in Transcriptome Profiling of Activated T Cells
Source: PLoS One. 2014 Jan 16;9(1):e78644. doi: 10.1371/journal.pone.0078644 (PMC3894192; doi:10.1371/journal.pone.0078644)
Supplement: Dataset S1 — Annotation for all probes sets in the HT HG-U133+ PM array. (XLSX) [file pone.0078644.s004.xlsx]

## Sheet: Sheet1
probe set id	ClassicalProbeset	Gene Symbol	Gene Title	Sequence Type	UniGene ID	Entrez Gene	RefSeq Protein ID	RefSeq Transcript ID
229819_PM_at	229819_at	A1BG	alpha-1-B glycoprotein	Consensus sequence	Hs.529161	1	NP_570602	NM_130786
220951_PM_s_at	220951_s_at	A1CF	APOBEC1 complementation factor	Exemplar sequence	Hs.499643	29974	NP_055391 /// NP_620310 /// NP_620311	NM_014576 /// NM_138932 /// NM_138933
235070_PM_at	235070_at	A2BP1	ataxin 2-binding protein 1	Consensus sequence	Hs.459842	54715	NP_001135805 /// NP_001135806 /// NP_061193 /// NP_665898 /// NP_665899 /// NP_665900	NM_001142333 /// NM_001142334 /// NM_018723 /// NM_145891 /// NM_145892 /// NM_145893
221217_PM_s_at	221217_s_at	A2BP1	ataxin 2-binding protein 1	Exemplar sequence	Hs.459842	54715	NP_001135805 /// NP_001135806 /// NP_061193 /// NP_665898 /// NP_665899 /// NP_665900	NM_001142333 /// NM_001142334 /// NM_018723 /// NM_145891 /// NM_145892 /// NM_145893
1555456_PM_at	1555456_at	A2BP1	ataxin 2-binding protein 1	Consensus sequence	Hs.459842	54715	NP_001135805 /// NP_001135806 /// NP_061193 /// NP_665898 /// NP_665899 /// NP_665900	NM_001142333 /// NM_001142334 /// NM_018723 /// NM_145891 /// NM_145892 /// NM_145893
1553422_PM_s_at	1553422_s_at	A2BP1	ataxin 2-binding protein 1	Consensus sequence	Hs.459842	54715	NP_001135805 /// NP_001135806 /// NP_061193 /// NP_665898 /// NP_665899 /// NP_665900	NM_001142333 /// NM_001142334 /// NM_018723 /// NM_145891 /// NM_145892 /// NM_145893
237869_PM_at	237869_at	A2LD1	AIG2-like domain 1	Consensus sequence	Hs.350868	87769	NP_149101	NM_033110
232422_PM_at	232422_at	A2LD1	AIG2-like domain 1	Consensus sequence	Hs.350868	87769	NP_149101	NM_033110
217757_PM_at	217757_at	A2M	alpha-2-macroglobulin	Exemplar sequence	Hs.212838	2	NP_000005	NM_000014
1558450_PM_at	1558450_at	A2M	alpha-2-macroglobulin	Consensus sequence	Hs.212838	2	NP_000005	NM_000014
1564307_PM_a_at	1564307_a_at	A2ML1	alpha-2-macroglobulin-like 1	Consensus sequence	Hs.620532	144568	NP_653271	NM_144670
1553505_PM_at	1553505_at	A2ML1	alpha-2-macroglobulin-like 1	Consensus sequence	Hs.620532	144568	NP_653271	NM_144670
219488_PM_at	219488_at	A4GALT	alpha 1,4-galactosyltransferase	Exemplar sequence	Hs.105956	53947	NP_059132	NM_017436
221131_PM_at	221131_at	A4GNT	alpha-1,4-N-acetylglucosaminyltransferase	Exemplar sequence	Hs.278960	51146	NP_057245	NM_016161
234117_PM_at	234117_at	AAA1	asthma-associated alternatively spliced gene 1	Consensus sequence	Hs.487951	404744	---	NR_015356 /// NR_033664 /// NR_033665
1561490_PM_at	1561490_at	AAA1	asthma-associated alternatively spliced gene 1	Consensus sequence	Hs.487951	404744	---	NR_015356 /// NR_033664 /// NR_033665
218075_PM_at	218075_at	AAAS	achalasia, adrenocortical insufficiency, alacrimia (Allgrove, triple-A)	Exemplar sequence	Hs.369144	8086	NP_001166937 /// NP_056480	NM_001173466 /// NM_015665
218434_PM_s_at	218434_s_at	AACS	acetoacetyl-CoA synthetase	Exemplar sequence	Hs.656073	65985	NP_076417	NM_023928
1570020_PM_at	1570020_at	AACSL	acetoacetyl-CoA synthetase-like	Consensus sequence	Hs.382790	729522	---	NR_024035
205969_PM_at	205969_at	AADAC	arylacetamide deacetylase (esterase)	Exemplar sequence	Hs.506908	13	NP_001077	NM_001086
240420_PM_at	240420_at	AADACL2	arylacetamide deacetylase-like 2	Consensus sequence	Hs.144710	344752	NP_997248	NM_207365
223593_PM_at	223593_at	AADAT	aminoadipate aminotransferase	Exemplar sequence	Hs.529735	51166	NP_057312 /// NP_872603	NM_016228 /// NM_182662
202852_PM_s_at	202852_s_at	AAGAB	alpha- and gamma-adaptin binding protein	Exemplar sequence	Hs.254642	79719	NP_078942	NM_024666
202851_PM_at	202851_at	AAGAB	alpha- and gamma-adaptin binding protein	Exemplar sequence	Hs.254642	79719	NP_078942	NM_024666
243284_PM_at	243284_at	AAGAB	alpha- and gamma-adaptin binding protein	Consensus sequence	Hs.254642	79719	NP_078942	NM_024666
238100_PM_at	238100_at	AAK1	AP2 associated kinase 1	Consensus sequence	Hs.468878	22848	NP_055726	NM_014911
214956_PM_at	214956_at	AAK1	AP2 associated kinase 1	Consensus sequence	Hs.468878	22848	NP_055726	NM_014911
211186_PM_s_at	211186_s_at	AAK1	AP2 associated kinase 1	Exemplar sequence	Hs.468878	22848	NP_055726	NM_014911
205434_PM_s_at	205434_s_at	AAK1	AP2 associated kinase 1	Consensus sequence	Hs.468878	22848	NP_055726	NM_014911
225522_PM_at	225522_at	AAK1	AP2 associated kinase 1	Consensus sequence	Hs.468878	22848	NP_055726	NM_014911
214998_PM_at	214998_at	AAK1	AP2 associated kinase 1	Consensus sequence	Hs.468878	22848	NP_055726	NM_014911
205435_PM_s_at	205435_s_at	AAK1	AP2 associated kinase 1	Exemplar sequence	Hs.468878	22848	NP_055726	NM_014911
201511_PM_at	201511_at	AAMP	angio-associated, migratory cell protein	Exemplar sequence	Hs.83347	14	NP_001078	NM_001087
207225_PM_at	207225_at	AANAT	aralkylamine N-acetyltransferase	Exemplar sequence	Hs.431417	15	NP_001079 /// NP_001160051	NM_001088 /// NM_001166579
201000_PM_at	201000_at	AARS	alanyl-tRNA synthetase	Exemplar sequence	Hs.315137	16	NP_001596	NM_001605
231845_PM_at	231845_at	AARS2	alanyl-tRNA synthetase 2, mitochondrial (putative)	Consensus sequence	Hs.158381	57505	NP_065796	NM_020745
230024_PM_at	230024_at	AARS2	alanyl-tRNA synthetase 2, mitochondrial (putative)	Consensus sequence	Hs.158381	57505	NP_065796	NM_020745
238740_PM_at	238740_at	AARSD1	alanyl-tRNA synthetase domain containing 1	Consensus sequence	Hs.317403	80755	NP_001129514 /// NP_001136125 /// NP_001136126 /// NP_079543	NM_001136042 /// NM_001142653 /// NM_001142654 /// NM_025267
222064_PM_s_at	222064_s_at	AARSD1	alanyl-tRNA synthetase domain containing 1	Consensus sequence	Hs.317403	80755	NP_001129514 /// NP_001136125 /// NP_001136126 /// NP_079543	NM_001136042 /// NM_001142653 /// NM_001142654 /// NM_025267
235435_PM_at	235435_at	AASDH	aminoadipate-semialdehyde dehydrogenase	Consensus sequence	Hs.104347	132949	NP_861522	NM_181806
228041_PM_at	228041_at	AASDH	aminoadipate-semialdehyde dehydrogenase	Consensus sequence	Hs.104347	132949	NP_861522	NM_181806
202170_PM_s_at	202170_s_at	AASDHPPT	aminoadipate-semialdehyde dehydrogenase-phosphopantetheinyl transferase	Exemplar sequence	Hs.524009	60496	NP_056238	NM_015423
224313_PM_at	224313_at	AASDHPPT	Aminoadipate-semialdehyde dehydrogenase-phosphopantetheinyl transferase	Exemplar sequence	Hs.524009	60496	NP_056238	NM_015423
202169_PM_s_at	202169_s_at	AASDHPPT	aminoadipate-semialdehyde dehydrogenase-phosphopantetheinyl transferase	Exemplar sequence	Hs.524009	60496	NP_056238	NM_015423
210852_PM_s_at	210852_s_at	AASS	aminoadipate-semialdehyde synthase	Exemplar sequence	Hs.156738	10157	NP_005754	NM_005763
214829_PM_at	214829_at	AASS	aminoadipate-semialdehyde synthase	Consensus sequence	Hs.156738	10157	NP_005754	NM_005763
209165_PM_at	209165_at	AATF	apoptosis antagonizing transcription factor	Exemplar sequence	Hs.195740	26574	NP_036270	NM_012138
205986_PM_at	205986_at	AATK	apoptosis-associated tyrosine kinase	Exemplar sequence	Hs.514575	9625	NP_001073864	NM_001080395
209460_PM_at	209460_at	ABAT	4-aminobutyrate aminotransferase	Exemplar sequence	Hs.336768	18	NP_000654 /// NP_001120920 /// NP_065737	NM_000663 /// NM_001127448 /// NM_020686
206527_PM_at	206527_at	ABAT	4-aminobutyrate aminotransferase	Exemplar sequence	Hs.336768	18	NP_000654 /// NP_001120920 /// NP_065737	NM_000663 /// NM_001127448 /// NM_020686
209459_PM_s_at	209459_s_at	ABAT	4-aminobutyrate aminotransferase	Exemplar sequence	Hs.336768	18	NP_000654 /// NP_001120920 /// NP_065737	NM_000663 /// NM_001127448 /// NM_020686
216066_PM_at	216066_at	ABCA1	ATP-binding cassette, sub-family A (ABC1), member 1	Consensus sequence	Hs.429294	19	NP_005493	NM_005502
203505_PM_at	203505_at	ABCA1	ATP-binding cassette, sub-family A (ABC1), member 1	Exemplar sequence	Hs.429294	19	NP_005493	NM_005502
1570279_PM_at	1570279_at	ABCA1	ATP-binding cassette, sub-family A (ABC1), member 1	Consensus sequence	Hs.429294	19	NP_005493	NM_005502
203504_PM_s_at	203504_s_at	ABCA1	ATP-binding cassette, sub-family A (ABC1), member 1	Exemplar sequence	Hs.429294	19	NP_005493	NM_005502
220159_PM_at	220159_at	ABCA11P	ATP-binding cassette, sub-family A (ABC1), member 11 (pseudogene)	Exemplar sequence	Hs.428360	79963	---	NR_002451
215465_PM_at	215465_at	ABCA12	ATP-binding cassette, sub-family A (ABC1), member 12	Consensus sequence	Hs.134585	26154	NP_056472 /// NP_775099	NM_015657 /// NM_173076
1553605_PM_a_at	1553605_a_at	ABCA13	ATP-binding cassette, sub-family A (ABC1), member 13	Consensus sequence	Hs.226568	154664	NP_689914	NM_152701
1553604_PM_at	1553604_at	ABCA13	ATP-binding cassette, sub-family A (ABC1), member 13	Consensus sequence	Hs.226568	154664	NP_689914	NM_152701
1553295_PM_at	1553295_at	ABCA13	ATP-binding cassette, sub-family A (ABC1), member 13	Consensus sequence	Hs.226568	154664	NP_689914	NM_152701
231164_PM_at	231164_at	ABCA17P	ATP-binding cassette, sub-family A (ABC1), member 17, pseudogene	Consensus sequence	Hs.376281	650655	---	NR_003574
210099_PM_at	210099_at	ABCA2	ATP-binding cassette, sub-family A (ABC1), member 2	Consensus sequence	Hs.421202	20	NP_001597 /// NP_997698	NM_001606 /// NM_212533
210100_PM_s_at	210100_s_at	ABCA2	ATP-binding cassette, sub-family A (ABC1), member 2	Exemplar sequence	Hs.421202	20	NP_001597 /// NP_997698	NM_001606 /// NM_212533
212772_PM_s_at	212772_s_at	ABCA2	ATP-binding cassette, sub-family A (ABC1), member 2	Consensus sequence	Hs.421202	20	NP_001597 /// NP_997698	NM_001606 /// NM_212533
204343_PM_at	204343_at	ABCA3	ATP-binding cassette, sub-family A (ABC1), member 3	Exemplar sequence	Hs.26630	21	NP_001080	NM_001089
1569102_PM_at	1569102_at	ABCA4	ATP-binding cassette, sub-family A (ABC1), member 4	Consensus sequence	Hs.416707	24	NP_000341	NM_000350
210082_PM_at	210082_at	ABCA4	ATP-binding cassette, sub-family A (ABC1), member 4	Exemplar sequence	Hs.416707	24	NP_000341	NM_000350
241705_PM_at	241705_at	ABCA5	ATP-binding cassette, sub-family A (ABC1), member 5	Consensus sequence	Hs.421474	23461	NP_061142 /// NP_758424	NM_018672 /// NM_172232
213353_PM_at	213353_at	ABCA5	ATP-binding cassette, sub-family A (ABC1), member 5	Consensus sequence	Hs.421474	23461	NP_061142 /// NP_758424	NM_018672 /// NM_172232
217504_PM_at	217504_at	ABCA6	ATP-binding cassette, sub-family A (ABC1), member 6	Consensus sequence	Hs.709514	23460	NP_525023	NM_080284
219577_PM_s_at	219577_s_at	ABCA7	ATP-binding cassette, sub-family A (ABC1), member 7	Exemplar sequence	Hs.134514	10347	NP_061985	NM_019112
1565780_PM_at	1565780_at	ABCA8	ATP-binding cassette, sub-family A (ABC1), member 8	Consensus sequence	Hs.58351	10351	NP_009099	NM_007168
204719_PM_at	204719_at	ABCA8	ATP-binding cassette, sub-family A (ABC1), member 8	Exemplar sequence	Hs.58351	10351	NP_009099	NM_007168
1565778_PM_at	1565778_at	ABCA8	ATP-binding cassette, sub-family A (ABC1), member 8	Consensus sequence	Hs.58351	10351	NP_009099	NM_007168
235335_PM_at	235335_at	ABCA9	ATP-binding cassette, sub-family A (ABC1), member 9	Consensus sequence	Hs.131686	10350	NP_525022	NM_080283
239185_PM_at	239185_at	ABCA9	ATP-binding cassette, sub-family A (ABC1), member 9	Consensus sequence	Hs.131686	10350	NP_525022	NM_080283
242541_PM_at	242541_at	ABCA9	ATP-binding cassette, sub-family A (ABC1), member 9	Consensus sequence	Hs.131686	10350	NP_525022	NM_080283
209993_PM_at	209993_at	ABCB1	ATP-binding cassette, sub-family B (MDR/TAP), member 1	Exemplar sequence	Hs.489033	5243	NP_000918	NM_000927
243951_PM_at	243951_at	ABCB1	ATP-binding cassette, sub-family B (MDR/TAP), member 1	Consensus sequence	Hs.489033	5243	NP_000918	NM_000927
209994_PM_s_at	209994_s_at	ABCB1 /// ABCB4	ATP-binding cassette, sub-family B (MDR/TAP), member 1 /// ATP-binding cassette, sub-family B (MDR/TAP), member 4	Exemplar sequence	Hs.654403	5243 /// 5244	NP_000434 /// NP_000918 /// NP_061337 /// NP_061338	NM_000443 /// NM_000927 /// NM_018849 /// NM_018850
223320_PM_s_at	223320_s_at	ABCB10	ATP-binding cassette, sub-family B (MDR/TAP), member 10	Exemplar sequence	Hs.17614	23456	NP_036221	NM_012089
211224_PM_s_at	211224_s_at	ABCB11	ATP-binding cassette, sub-family B (MDR/TAP), member 11	Exemplar sequence	Hs.658439	8647	NP_003733	NM_003742
208288_PM_at	208288_at	ABCB11	ATP-binding cassette, sub-family B (MDR/TAP), member 11	Exemplar sequence	Hs.658439	8647	NP_003733	NM_003742
1570505_PM_at	1570505_at	ABCB4	ATP-binding cassette, sub-family B (MDR/TAP), member 4	Consensus sequence	Hs.654403	5244	NP_000434 /// NP_061337 /// NP_061338	NM_000443 /// NM_018849 /// NM_018850
207819_PM_s_at	207819_s_at	ABCB4	ATP-binding cassette, sub-family B (MDR/TAP), member 4	Exemplar sequence	Hs.654403	5244	NP_000434 /// NP_061337 /// NP_061338	NM_000443 /// NM_018849 /// NM_018850
1555371_PM_at	1555371_at	ABCB5	ATP-binding cassette, sub-family B (MDR/TAP), member 5	Consensus sequence	Hs.404102	340273	NP_001157413 /// NP_001157414 /// NP_001157465 /// NP_848654	NM_001163941 /// NM_001163942 /// NM_001163993 /// NM_178559
243167_PM_at	243167_at	ABCB5	ATP-binding cassette, sub-family B (MDR/TAP), member 5	Consensus sequence	Hs.404102	340273	NP_001157413 /// NP_001157414 /// NP_001157465 /// NP_848654	NM_001163941 /// NM_001163942 /// NM_001163993 /// NM_178559
1569072_PM_s_at	1569072_s_at	ABCB5	ATP-binding cassette, sub-family B (MDR/TAP), member 5	Consensus sequence	Hs.404102	340273	NP_001157413 /// NP_001157414 /// NP_001157465 /// NP_848654	NM_001163941 /// NM_001163942 /// NM_001163993 /// NM_178559
240717_PM_at	240717_at	ABCB5	ATP-binding cassette, sub-family B (MDR/TAP), member 5	Consensus sequence	Hs.404102	340273	NP_001157413 /// NP_001157414 /// NP_001157465 /// NP_848654	NM_001163941 /// NM_001163942 /// NM_001163993 /// NM_178559
203191_PM_at	203191_at	ABCB6	ATP-binding cassette, sub-family B (MDR/TAP), member 6	Consensus sequence	Hs.107911	10058	NP_005680	NM_005689
203192_PM_at	203192_at	ABCB6	ATP-binding cassette, sub-family B (MDR/TAP), member 6	Exemplar sequence	Hs.107911	10058	NP_005680	NM_005689
209620_PM_s_at	209620_s_at	ABCB7	ATP-binding cassette, sub-family B (MDR/TAP), member 7	Exemplar sequence	Hs.370480	22	NP_004290	NM_004299
229539_PM_at	229539_at	ABCB8	ATP-binding cassette, sub-family B (MDR/TAP), member 8	Consensus sequence	Hs.647118	11194	NP_009119	NM_007188
206317_PM_s_at	206317_s_at	ABCB8	ATP-binding cassette, sub-family B (MDR/TAP), member 8	Exemplar sequence	Hs.647118	11194	NP_009119	NM_007188
214209_PM_s_at	214209_s_at	ABCB9	ATP-binding cassette, sub-family B (MDR/TAP), member 9	Consensus sequence	Hs.511951	23457	NP_062570 /// NP_062571 /// NP_982269	NM_019624 /// NM_019625 /// NM_203444
1555323_PM_at	1555323_at	ABCB9	ATP-binding cassette, sub-family B (MDR/TAP), member 9	Consensus sequence	Hs.511951	23457	NP_062570 /// NP_062571 /// NP_982269	NM_019624 /// NM_019625 /// NM_203444
207321_PM_s_at	207321_s_at	ABCB9	ATP-binding cassette, sub-family B (MDR/TAP), member 9	Exemplar sequence	Hs.511951	23457	NP_062570 /// NP_062571 /// NP_982269	NM_019624 /// NM_019625 /// NM_203444
202805_PM_s_at	202805_s_at	ABCC1	ATP-binding cassette, sub-family C (CFTR/MRP), member 1	Exemplar sequence	Hs.391464	4363	NP_004987 /// NP_063915 /// NP_063953 /// NP_063954 /// NP_063955	NM_004996 /// NM_019862 /// NM_019898 /// NM_019899 /// NM_019900
202804_PM_at	202804_at	ABCC1	ATP-binding cassette, sub-family C (CFTR/MRP), member 1	Consensus sequence	Hs.391464	4363	NP_004987 /// NP_063915 /// NP_063953 /// NP_063954 /// NP_063955	NM_004996 /// NM_019862 /// NM_019898 /// NM_019899 /// NM_019900
215873_PM_x_at	215873_x_at	ABCC10	ATP-binding cassette, sub-family C (CFTR/MRP), member 10	Consensus sequence	Hs.55879	89845	NP_258261	NM_033450
213485_PM_s_at	213485_s_at	ABCC10	ATP-binding cassette, sub-family C (CFTR/MRP), member 10	Consensus sequence	Hs.55879	89845	NP_258261	NM_033450
1554911_PM_at	1554911_at	ABCC11	ATP-binding cassette, sub-family C (CFTR/MRP), member 11	Consensus sequence	Hs.652267	85320	NP_115972 /// NP_149163 /// NP_660187	NM_032583 /// NM_033151 /// NM_145186
224146_PM_s_at	224146_s_at	ABCC11	ATP-binding cassette, sub-family C (CFTR/MRP), member 11	Exemplar sequence	Hs.652267	85320	NP_115972 /// NP_149163 /// NP_660187	NM_032583 /// NM_033151 /// NM_145186
1552590_PM_a_at	1552590_a_at	ABCC12	ATP-binding cassette, sub-family C (CFTR/MRP), member 12	Consensus sequence	Hs.410111	94160	NP_150229	NM_033226
1553410_PM_a_at	1553410_a_at	ABCC12	ATP-binding cassette, sub-family C (CFTR/MRP), member 12	Consensus sequence	Hs.410111	94160	NP_150229	NM_033226
1552583_PM_s_at	1552583_s_at	ABCC13	ATP-binding cassette, sub-family C (CFTR/MRP), member 13, pseudogene	Consensus sequence	Hs.366575	150000	---	NR_003087 /// NR_003088
1552582_PM_at	1552582_at	ABCC13	ATP-binding cassette, sub-family C (CFTR/MRP), member 13, pseudogene	Consensus sequence	Hs.366575	150000	---	NR_003087 /// NR_003088
1555265_PM_at	1555265_at	ABCC13	ATP-binding cassette, sub-family C (CFTR/MRP), member 13, pseudogene	Consensus sequence	Hs.366575	150000	---	NR_003087 /// NR_003088
233371_PM_at	233371_at	ABCC13	ATP-binding cassette, sub-family C (CFTR/MRP), member 13, pseudogene	Consensus sequence	Hs.366575	150000	---	NR_003087 /// NR_003088
206155_PM_at	206155_at	ABCC2	ATP-binding cassette, sub-family C (CFTR/MRP), member 2	Exemplar sequence	Hs.368243	1244	NP_000383	NM_000392
230682_PM_x_at	230682_x_at	ABCC3	ATP-binding cassette, sub-family C (CFTR/MRP), member 3	Consensus sequence	Hs.463421	8714	NP_001137542 /// NP_003777	NM_001144070 /// NM_003786
209641_PM_s_at	209641_s_at	ABCC3	ATP-binding cassette, sub-family C (CFTR/MRP), member 3	Exemplar sequence	Hs.463421	8714	NP_001137542 /// NP_003777	NM_001144070 /// NM_003786
214979_PM_at	214979_at	ABCC3	ATP-binding cassette, sub-family C (CFTR/MRP), member 3	Consensus sequence	Hs.463421	8714	NP_001137542 /// NP_003777	NM_001144070 /// NM_003786
242553_PM_at	242553_at	ABCC3	ATP-binding cassette, sub-family C (CFTR/MRP), member 3	Consensus sequence	Hs.463421	8714	NP_001137542 /// NP_003777	NM_001144070 /// NM_003786
239217_PM_x_at	239217_x_at	ABCC3	ATP-binding cassette, sub-family C (CFTR/MRP), member 3	Consensus sequence	Hs.463421	8714	NP_001137542 /// NP_003777	NM_001144070 /// NM_003786
208161_PM_s_at	208161_s_at	ABCC3	ATP-binding cassette, sub-family C (CFTR/MRP), member 3	Exemplar sequence	Hs.463421	8714	NP_001137542 /// NP_003777	NM_001144070 /// NM_003786
1554918_PM_a_at	1554918_a_at	ABCC4	ATP-binding cassette, sub-family C (CFTR/MRP), member 4	Consensus sequence	Hs.508423	10257	NP_001098985 /// NP_005836	NM_001105515 /// NM_005845
1555039_PM_a_at	1555039_a_at	ABCC4	ATP-binding cassette, sub-family C (CFTR/MRP), member 4	Consensus sequence	Hs.508423	10257	NP_001098985 /// NP_005836	NM_001105515 /// NM_005845
203196_PM_at	203196_at	ABCC4	ATP-binding cassette, sub-family C (CFTR/MRP), member 4	Consensus sequence	Hs.508423	10257	NP_001098985 /// NP_005836	NM_001105515 /// NM_005845
243928_PM_s_at	243928_s_at	ABCC4	ATP-binding cassette, sub-family C (CFTR/MRP), member 4	Consensus sequence	Hs.508423	10257	NP_001098985 /// NP_005836	NM_001105515 /// NM_005845
1558460_PM_at	1558460_at	ABCC5	ATP-binding cassette, sub-family C (CFTR/MRP), member 5	Consensus sequence	Hs.368563	10057	NP_001018881 /// NP_005679	NM_001023587 /// NM_005688
209380_PM_s_at	209380_s_at	ABCC5	ATP-binding cassette, sub-family C (CFTR/MRP), member 5	Exemplar sequence	Hs.368563	10057	NP_001018881 /// NP_005679	NM_001023587 /// NM_005688
226363_PM_at	226363_at	ABCC5	ATP-binding cassette, sub-family C (CFTR/MRP), member 5	Consensus sequence	Hs.368563	10057	NP_001018881 /// NP_005679	NM_001023587 /// NM_005688
214033_PM_at	214033_at	ABCC6 /// ABCC6P2	ATP-binding cassette, sub-family C (CFTR/MRP), member 6 /// ATP-binding cassette, sub-family C, member 6 pseudogene 2	Consensus sequence	Hs.442182	368 /// 730013	NP_001072996 /// NP_001162	NM_001079528 /// NM_001171 /// NR_023387
208480_PM_s_at	208480_s_at	ABCC6 /// LOC100292715	ATP-binding cassette, sub-family C (CFTR/MRP), member 6 /// hypothetical protein LOC100292715	Exemplar sequence	Hs.442182	100292715 /// 368	NP_001072996 /// NP_001162 /// XP_002345003	NM_001079528 /// NM_001171 /// XM_002344962
215559_PM_at	215559_at	ABCC6 /// LOC100292715	ATP-binding cassette, sub-family C (CFTR/MRP), member 6 /// hypothetical protein LOC100292715	Consensus sequence	Hs.442182	100292715 /// 368	NP_001072996 /// NP_001162 /// XP_002345003	NM_001079528 /// NM_001171 /// XM_002344962
236205_PM_at	236205_at	ABCC6P1	ATP-binding cassette, sub-family C, member 6 pseudogene 1	Consensus sequence	Hs.13188	653190	---	NR_003569
210245_PM_at	210245_at	ABCC8	ATP-binding cassette, sub-family C (CFTR/MRP), member 8	Consensus sequence	Hs.54470	6833	NP_000343	NM_000352
210246_PM_s_at	210246_s_at	ABCC8	ATP-binding cassette, sub-family C (CFTR/MRP), member 8	Exemplar sequence	Hs.54470	6833	NP_000343	NM_000352
1557374_PM_at	1557374_at	ABCC9	ATP-binding cassette, sub-family C (CFTR/MRP), member 9	Consensus sequence	Hs.446050	10060	NP_005682 /// NP_064693 /// NP_064694	NM_005691 /// NM_020297 /// NM_020298
208462_PM_s_at	208462_s_at	ABCC9	ATP-binding cassette, sub-family C (CFTR/MRP), member 9	Exemplar sequence	Hs.446050	10060	NP_005682 /// NP_064693 /// NP_064694	NM_005691 /// NM_020297 /// NM_020298
208561_PM_at	208561_at	ABCC9	ATP-binding cassette, sub-family C (CFTR/MRP), member 9	Exemplar sequence	Hs.446050	10060	NP_005682 /// NP_064693 /// NP_064694	NM_005691 /// NM_020297 /// NM_020298
235578_PM_at	235578_at	ABCC9	ATP-binding cassette, sub-family C (CFTR/MRP), member 9	Consensus sequence	Hs.446050	10060	NP_005682 /// NP_064693 /// NP_064694	NM_005691 /// NM_020297 /// NM_020298
208562_PM_s_at	208562_s_at	ABCC9	ATP-binding cassette, sub-family C (CFTR/MRP), member 9	Exemplar sequence	Hs.446050	10060	NP_005682 /// NP_064693 /// NP_064694	NM_005691 /// NM_020297 /// NM_020298
216418_PM_at	216418_at	ABCD1	ATP-binding cassette, sub-family D (ALD), member 1	Consensus sequence	Hs.159546	215	NP_000024	NM_000033
205142_PM_x_at	205142_x_at	ABCD1	ATP-binding cassette, sub-family D (ALD), member 1	Exemplar sequence	Hs.159546	215	NP_000024	NM_000033
207583_PM_at	207583_at	ABCD2	ATP-binding cassette, sub-family D (ALD), member 2	Exemplar sequence	Hs.117852	225	NP_005155	NM_005164
202850_PM_at	202850_at	ABCD3	ATP-binding cassette, sub-family D (ALD), member 3	Exemplar sequence	Hs.700576	5825	NP_001116146 /// NP_002849	NM_001122674 /// NM_002858
1554878_PM_a_at	1554878_a_at	ABCD3	ATP-binding cassette, sub-family D (ALD), member 3	Consensus sequence	Hs.700576	5825	NP_001116146 /// NP_002849	NM_001122674 /// NM_002858
203981_PM_s_at	203981_s_at	ABCD4	ATP-binding cassette, sub-family D (ALD), member 4	Consensus sequence	Hs.94395	5826	NP_005041	NM_005050 /// NR_003256
203982_PM_s_at	203982_s_at	ABCD4	ATP-binding cassette, sub-family D (ALD), member 4	Exemplar sequence	Hs.94395	5826	NP_005041	NM_005050 /// NR_003256
201872_PM_s_at	201872_s_at	ABCE1	ATP-binding cassette, sub-family E (OABP), member 1	Consensus sequence	Hs.12013	6059	NP_001035809 /// NP_002931	NM_001040876 /// NM_002940
201873_PM_s_at	201873_s_at	ABCE1	ATP-binding cassette, sub-family E (OABP), member 1	Exemplar sequence	Hs.12013	6059	NP_001035809 /// NP_002931	NM_001040876 /// NM_002940
200045_PM_at	200045_at	ABCF1	ATP-binding cassette, sub-family F (GCN20), member 1	Exemplar sequence	Hs.655285	23	NP_001020262 /// NP_001081	NM_001025091 /// NM_001090
209247_PM_s_at	209247_s_at	ABCF2	ATP-binding cassette, sub-family F (GCN20), member 2	Exemplar sequence	Hs.654958	10061	NP_005683 /// NP_009120	NM_005692 /// NM_007189
207623_PM_at	207623_at	ABCF2	ATP-binding cassette, sub-family F (GCN20), member 2	Exemplar sequence	Hs.654958	10061	NP_005683 /// NP_009120	NM_005692 /// NM_007189
207622_PM_s_at	207622_s_at	ABCF2	ATP-binding cassette, sub-family F (GCN20), member 2	Exemplar sequence	Hs.654958	10061	NP_005683 /// NP_009120	NM_005692 /// NM_007189
209246_PM_at	209246_at	ABCF2	ATP-binding cassette, sub-family F (GCN20), member 2	Exemplar sequence	Hs.654958	10061	NP_005683 /// NP_009120	NM_005692 /// NM_007189
202394_PM_s_at	202394_s_at	ABCF3	ATP-binding cassette, sub-family F (GCN20), member 3	Exemplar sequence	Hs.361323	55324	NP_060828	NM_018358
204567_PM_s_at	204567_s_at	ABCG1	ATP-binding cassette, sub-family G (WHITE), member 1	Exemplar sequence	Hs.124649	9619	NP_004906 /// NP_058198 /// NP_997057 /// NP_997510 /// NP_997511 /// NP_997512	NM_004915 /// NM_016818 /// NM_207174 /// NM_207627 /// NM_207628 /// NM_207629
211113_PM_s_at	211113_s_at	ABCG1	ATP-binding cassette, sub-family G (WHITE), member 1	Exemplar sequence	Hs.124649	9619	NP_004906 /// NP_058198 /// NP_997057 /// NP_997510 /// NP_997511 /// NP_997512	NM_004915 /// NM_016818 /// NM_207174 /// NM_207627 /// NM_207628 /// NM_207629
209735_PM_at	209735_at	ABCG2	ATP-binding cassette, sub-family G (WHITE), member 2	Exemplar sequence	Hs.480218	9429	NP_004818	NM_004827
207593_PM_at	207593_at	ABCG4	ATP-binding cassette, sub-family G (WHITE), member 4	Exemplar sequence	Hs.126378	64137	NP_001135977 /// NP_071452	NM_001142505 /// NM_022169
220383_PM_at	220383_at	ABCG5	ATP-binding cassette, sub-family G (WHITE), member 5	Exemplar sequence	Hs.132992	64240	NP_071881	NM_022436
231751_PM_at	231751_at	ABCG8	ATP-binding cassette, sub-family G (WHITE), member 8	Consensus sequence	Hs.413931	64241	NP_071882	NM_022437
232550_PM_at	232550_at	ABHD1	abhydrolase domain containing 1	Consensus sequence	Hs.375791	84696	NP_115993	NM_032604
1560117_PM_at	1560117_at	ABHD1	abhydrolase domain containing 1	Consensus sequence	Hs.375791	84696	NP_115993	NM_032604
236461_PM_at	236461_at	ABHD1	abhydrolase domain containing 1	Consensus sequence	Hs.375791	84696	NP_115993	NM_032604
222697_PM_s_at	222697_s_at	ABHD10	abhydrolase domain containing 10	Consensus sequence	Hs.477115	55347	NP_060864	NM_018394
218633_PM_x_at	218633_x_at	ABHD10	abhydrolase domain containing 10	Exemplar sequence	Hs.477115	55347	NP_060864	NM_018394
1552470_PM_a_at	1552470_a_at	ABHD11	abhydrolase domain containing 11	Consensus sequence	Hs.647045	83451	NP_001138835 /// NP_001138836 /// NP_683710 /// NP_683711 /// NP_683714	NM_001145363 /// NM_001145364 /// NM_148912 /// NM_148913 /// NM_148916 /// NR_026910 /// NR_026912
1552800_PM_at	1552800_at	ABHD11	abhydrolase domain containing 11	Consensus sequence	Hs.647045	83451	NP_001138835 /// NP_001138836 /// NP_683710 /// NP_683711 /// NP_683714	NM_001145363 /// NM_001145364 /// NM_148912 /// NM_148913 /// NM_148916 /// NR_026910 /// NR_026912
221927_PM_s_at	221927_s_at	ABHD11	abhydrolase domain containing 11	Consensus sequence	Hs.647045	83451	NP_001138835 /// NP_001138836 /// NP_683710 /// NP_683711 /// NP_683714	NM_001145363 /// NM_001145364 /// NM_148912 /// NM_148913 /// NM_148916 /// NR_026910 /// NR_026912
228123_PM_s_at	228123_s_at	ABHD12	abhydrolase domain containing 12	Consensus sequence	Hs.441550	26090	NP_001035937 /// NP_056415	NM_001042472 /// NM_015600
228124_PM_at	228124_at	ABHD12	abhydrolase domain containing 12	Consensus sequence	Hs.441550	26090	NP_001035937 /// NP_056415	NM_001042472 /// NM_015600
224742_PM_at	224742_at	ABHD12	abhydrolase domain containing 12	Consensus sequence	Hs.441550	26090	NP_001035937 /// NP_056415	NM_001042472 /// NM_015600
237974_PM_at	237974_at	ABHD12B	abhydrolase domain containing 12B	Consensus sequence	Hs.271896	145447	NP_853511 /// NP_861535	NM_181533 /// NM_181814
1564357_PM_at	1564357_at	ABHD12B	abhydrolase domain containing 12B	Consensus sequence	Hs.271896	145447	NP_853511 /// NP_861535	NM_181533 /// NM_181814
234993_PM_at	234993_at	ABHD13	abhydrolase domain containing 13	Consensus sequence	Hs.183528	84945	NP_116248	NM_032859
235348_PM_at	235348_at	ABHD13	abhydrolase domain containing 13	Consensus sequence	Hs.183528	84945	NP_116248	NM_032859
210006_PM_at	210006_at	ABHD14A	abhydrolase domain containing 14A	Exemplar sequence	---	25864	NP_056222	NM_015407
224821_PM_at	224821_at	ABHD14B	abhydrolase domain containing 14B	Consensus sequence	---	84836	NP_001139786 /// NP_116139	NM_001146314 /// NM_032750 /// NR_027476
226796_PM_at	226796_at	ABHD15	abhydrolase domain containing 15	Consensus sequence	Hs.106510	116236	NP_937790	NM_198147
63825_PM_at	63825_at	ABHD2	abhydrolase domain containing 2	Consensus sequence	Hs.122337	11057	NP_008942 /// NP_690888	NM_007011 /// NM_152924
225337_PM_at	225337_at	ABHD2	abhydrolase domain containing 2	Consensus sequence	Hs.122337	11057	NP_008942 /// NP_690888	NM_007011 /// NM_152924
87100_PM_at	87100_at	ABHD2	abhydrolase domain containing 2	Consensus sequence	Hs.122337	11057	NP_008942 /// NP_690888	NM_007011 /// NM_152924
205566_PM_at	205566_at	ABHD2	abhydrolase domain containing 2	Exemplar sequence	Hs.122337	11057	NP_008942 /// NP_690888	NM_007011 /// NM_152924
221815_PM_at	221815_at	ABHD2	abhydrolase domain containing 2	Consensus sequence	Hs.122337	11057	NP_008942 /// NP_690888	NM_007011 /// NM_152924
228490_PM_at	228490_at	ABHD2	abhydrolase domain containing 2	Consensus sequence	Hs.122337	11057	NP_008942 /// NP_690888	NM_007011 /// NM_152924
213017_PM_at	213017_at	ABHD3	abhydrolase domain containing 3	Consensus sequence	Hs.397978	171586	NP_612213	NM_138340
242023_PM_at	242023_at	ABHD4	abhydrolase domain containing 4	Consensus sequence	Hs.445665	63874	NP_071343	NM_022060
218581_PM_at	218581_at	ABHD4	abhydrolase domain containing 4	Exemplar sequence	Hs.445665	63874	NP_071343	NM_022060
232862_PM_at	232862_at	ABHD5	Abhydrolase domain containing 5	Consensus sequence	Hs.19385	51099	NP_057090	NM_016006
213935_PM_at	213935_at	ABHD5	abhydrolase domain containing 5	Consensus sequence	Hs.19385	51099	NP_057090	NM_016006
213805_PM_at	213805_at	ABHD5	abhydrolase domain containing 5	Consensus sequence	Hs.19385	51099	NP_057090	NM_016006
218739_PM_at	218739_at	ABHD5	abhydrolase domain containing 5	Exemplar sequence	Hs.19385	51099	NP_057090	NM_016006
221679_PM_s_at	221679_s_at	ABHD6	abhydrolase domain containing 6	Exemplar sequence	Hs.476454	57406	NP_065727	NM_020676
221678_PM_at	221678_at	ABHD6	abhydrolase domain containing 6	Exemplar sequence	Hs.476454	57406	NP_065727	NM_020676
221552_PM_at	221552_at	ABHD6	abhydrolase domain containing 6	Exemplar sequence	Hs.476454	57406	NP_065727	NM_020676
45288_PM_at	45288_at	ABHD6	abhydrolase domain containing 6	Consensus sequence	Hs.476454	57406	NP_065727	NM_020676
219101_PM_x_at	219101_x_at	ABHD8	abhydrolase domain containing 8	Exemplar sequence	Hs.515664	79575	NP_078803	NM_024527
209027_PM_s_at	209027_s_at	ABI1	abl-interactor 1	Consensus sequence	Hs.508148	10006	NP_001012768 /// NP_001012769 /// NP_001012770 /// NP_001171587 /// NP_001171590 /// NP_001171591 /// NP_001171592 /// NP_001171593 /// NP_001171594 /// NP_001171595 /// NP_001171596 /// NP_005461	NM_001012750 /// NM_001012751 /// NM_001012752 /// NM_001178116 /// NM_001178119 /// NM_001178120 /// NM_001178121 /// NM_001178122 /// NM_001178123 /// NM_001178124 /// NM_001178125 /// NM_005470
1559890_PM_a_at	1559890_a_at	ABI1	abl-interactor 1	Consensus sequence	Hs.508148	10006	NP_001012768 /// NP_001012769 /// NP_001012770 /// NP_001171587 /// NP_001171590 /// NP_001171591 /// NP_001171592 /// NP_001171593 /// NP_001171594 /// NP_001171595 /// NP_001171596 /// NP_005461	NM_001012750 /// NM_001012751 /// NM_001012752 /// NM_001178116 /// NM_001178119 /// NM_001178120 /// NM_001178121 /// NM_001178122 /// NM_001178123 /// NM_001178124 /// NM_001178125 /// NM_005470
209028_PM_s_at	209028_s_at	ABI1	abl-interactor 1	Exemplar sequence	Hs.508148	10006	NP_001012768 /// NP_001012769 /// NP_001012770 /// NP_001171587 /// NP_001171590 /// NP_001171591 /// NP_001171592 /// NP_001171593 /// NP_001171594 /// NP_001171595 /// NP_001171596 /// NP_005461	NM_001012750 /// NM_001012751 /// NM_001012752 /// NM_001178116 /// NM_001178119 /// NM_001178120 /// NM_001178121 /// NM_001178122 /// NM_001178123 /// NM_001178124 /// NM_001178125 /// NM_005470
209856_PM_x_at	209856_x_at	ABI2	abl-interactor 2	Exemplar sequence	Hs.471156	10152	NP_005750	NM_005759
207268_PM_x_at	207268_x_at	ABI2	abl-interactor 2	Exemplar sequence	Hs.471156	10152	NP_005750	NM_005759
216113_PM_at	216113_at	ABI2	Abl-interactor 2	Consensus sequence	Hs.471156	10152	NP_005750	NM_005759
211793_PM_s_at	211793_s_at	ABI2	abl-interactor 2	Exemplar sequence	Hs.471156	10152	NP_005750	NM_005759
225112_PM_at	225112_at	ABI2	abl-interactor 2	Consensus sequence	Hs.471156	10152	NP_005750	NM_005759
225098_PM_at	225098_at	ABI2	abl-interactor 2	Consensus sequence	Hs.471156	10152	NP_005750	NM_005759
223615_PM_at	223615_at	ABI3	ABI family, member 3	Exemplar sequence	Hs.130719	51225	NP_001128658 /// NP_057512	NM_001135186 /// NM_016428
220518_PM_at	220518_at	ABI3BP	ABI family, member 3 (NESH) binding protein	Exemplar sequence	Hs.477015	25890	NP_056244	NM_015429
1559077_PM_at	1559077_at	ABI3BP	ABI family, member 3 (NESH) binding protein	Consensus sequence	Hs.477015	25890	NP_056244	NM_015429
223395_PM_at	223395_at	ABI3BP	ABI family, member 3 (NESH) binding protein	Exemplar sequence	Hs.477015	25890	NP_056244	NM_015429
202123_PM_s_at	202123_s_at	ABL1	c-abl oncogene 1, receptor tyrosine kinase	Exemplar sequence	Hs.431048	25	NP_005148 /// NP_009297	NM_005157 /// NM_007313
231907_PM_at	231907_at	ABL2	v-abl Abelson murine leukemia viral oncogene homolog 2 (arg, Abelson-related gene)	Consensus sequence	Hs.159472	27	NP_001093578 /// NP_001129472 /// NP_001129473 /// NP_001161708 /// NP_001161709 /// NP_001161710 /// NP_001161711 /// NP_005149 /// NP_009298	NM_001100108 /// NM_001136000 /// NM_001136001 /// NM_001168236 /// NM_001168237 /// NM_001168238 /// NM_001168239 /// NM_005158 /// NM_007314
226893_PM_at	226893_at	ABL2	v-abl Abelson murine leukemia viral oncogene homolog 2 (arg, Abelson-related gene)	Consensus sequence	Hs.159472	27	NP_001093578 /// NP_001129472 /// NP_001129473 /// NP_001161708 /// NP_001161709 /// NP_001161710 /// NP_001161711 /// NP_005149 /// NP_009298	NM_001100108 /// NM_001136000 /// NM_001136001 /// NM_001168236 /// NM_001168237 /// NM_001168238 /// NM_001168239 /// NM_005158 /// NM_007314
206411_PM_s_at	206411_s_at	ABL2	v-abl Abelson murine leukemia viral oncogene homolog 2 (arg, Abelson-related gene)	Exemplar sequence	Hs.159472	27	NP_001093578 /// NP_001129472 /// NP_001129473 /// NP_001161708 /// NP_001161709 /// NP_001161710 /// NP_001161711 /// NP_005149 /// NP_009298	NM_001100108 /// NM_001136000 /// NM_001136001 /// NM_001168236 /// NM_001168237 /// NM_001168238 /// NM_001168239 /// NM_005158 /// NM_007314
210461_PM_s_at	210461_s_at	ABLIM1	actin binding LIM protein 1	Exemplar sequence	Hs.438236	3983	NP_001003407 /// NP_001003408 /// NP_002304 /// NP_006711	NM_001003407 /// NM_001003408 /// NM_002313 /// NM_006720
200965_PM_s_at	200965_s_at	ABLIM1	actin binding LIM protein 1	Exemplar sequence	Hs.438236	3983	NP_001003407 /// NP_001003408 /// NP_002304 /// NP_006711	NM_001003407 /// NM_001003408 /// NM_002313 /// NM_006720
1567623_PM_at	1567623_at	ABLIM2	Actin binding LIM protein family, member 2	Consensus sequence	Hs.233404	84448	NP_001123555 /// NP_001123556 /// NP_001123557 /// NP_001123558 /// NP_001123559 /// NP_001123560 /// NP_115808	NM_001130083 /// NM_001130084 /// NM_001130085 /// NM_001130086 /// NM_001130087 /// NM_001130088 /// NM_032432
242624_PM_at	242624_at	ABLIM2	actin binding LIM protein family, member 2	Consensus sequence	Hs.233404	84448	NP_001123555 /// NP_001123556 /// NP_001123557 /// NP_001123558 /// NP_001123559 /// NP_001123560 /// NP_115808	NM_001130083 /// NM_001130084 /// NM_001130085 /// NM_001130086 /// NM_001130087 /// NM_001130088 /// NM_032432
1567622_PM_at	1567622_at	ABLIM2	Actin binding LIM protein family, member 2	Consensus sequence	Hs.233404	84448	NP_001123555 /// NP_001123556 /// NP_001123557 /// NP_001123558 /// NP_001123559 /// NP_001123560 /// NP_115808	NM_001130083 /// NM_001130084 /// NM_001130085 /// NM_001130086 /// NM_001130087 /// NM_001130088 /// NM_032432
228132_PM_at	228132_at	ABLIM2	actin binding LIM protein family, member 2	Consensus sequence	Hs.233404	84448	NP_001123555 /// NP_001123556 /// NP_001123557 /// NP_001123558 /// NP_001123559 /// NP_001123560 /// NP_115808	NM_001130083 /// NM_001130084 /// NM_001130085 /// NM_001130086 /// NM_001130087 /// NM_001130088 /// NM_032432
236087_PM_at	236087_at	ABLIM2	actin binding LIM protein family, member 2	Consensus sequence	Hs.233404	84448	NP_001123555 /// NP_001123556 /// NP_001123557 /// NP_001123558 /// NP_001123559 /// NP_001123560 /// NP_115808	NM_001130083 /// NM_001130084 /// NM_001130085 /// NM_001130086 /// NM_001130087 /// NM_001130088 /// NM_032432
205730_PM_s_at	205730_s_at	ABLIM3	actin binding LIM protein family, member 3	Exemplar sequence	Hs.49688	22885	NP_055760	NM_014945
214504_PM_at	214504_at	ABO	ABO blood group (transferase A, alpha 1-3-N-acetylgalactosaminyltransferase; transferase B, alpha 1-3-galactosyltransferase)	Consensus sequence	Hs.654423	28	NP_065202	NM_020469
216716_PM_at	216716_at	ABO	ABO blood group (transferase A, alpha 1-3-N-acetylgalactosaminyltransferase; transferase B, alpha 1-3-galactosyltransferase)	Consensus sequence	Hs.654423	28	NP_065202	NM_020469
216929_PM_x_at	216929_x_at	ABO	ABO blood group (transferase A, alpha 1-3-N-acetylgalactosaminyltransferase; transferase B, alpha 1-3-galactosyltransferase)	Consensus sequence	Hs.654423	28	NP_065202	NM_020469
203559_PM_s_at	203559_s_at	ABP1	amiloride binding protein 1 (amine oxidase (copper-containing))	Exemplar sequence	Hs.647097	26	NP_001082	NM_001091
212895_PM_s_at	212895_s_at	ABR	active BCR-related gene	Consensus sequence	Hs.159306	29	NP_001083 /// NP_001153218 /// NP_068781	NM_001092 /// NM_001159746 /// NM_021962
214671_PM_s_at	214671_s_at	ABR	active BCR-related gene	Consensus sequence	Hs.159306	29	NP_001083 /// NP_001153218 /// NP_068781	NM_001092 /// NM_001159746 /// NM_021962
1552731_PM_at	1552731_at	ABRA	actin-binding Rho activating protein	Consensus sequence	Hs.374668	137735	NP_631905	NM_139166
1552732_PM_at	1552732_at	ABRA	actin-binding Rho activating protein	Consensus sequence	Hs.374668	137735	NP_631905	NM_139166
218405_PM_at	218405_at	ABT1	activator of basal transcription 1	Exemplar sequence	Hs.254406	29777	NP_037507	NM_013375
228848_PM_at	228848_at	ABTB1	ankyrin repeat and BTB (POZ) domain containing 1	Consensus sequence	Hs.107812	80325	NP_115937 /// NP_742024 /// NP_742025	NM_032548 /// NM_172027 /// NM_172028 /// NR_033428 /// NR_033429
226442_PM_at	226442_at	ABTB1	ankyrin repeat and BTB (POZ) domain containing 1	Consensus sequence	Hs.107812	80325	NP_115937 /// NP_742024 /// NP_742025	NM_032548 /// NM_172027 /// NM_172028 /// NR_033428 /// NR_033429
229164_PM_s_at	229164_s_at	ABTB1	ankyrin repeat and BTB (POZ) domain containing 1	Consensus sequence	Hs.107812	80325	NP_115937 /// NP_742024 /// NP_742025	NM_032548 /// NM_172027 /// NM_172028 /// NR_033428 /// NR_033429
229162_PM_s_at	229162_s_at	ABTB1	ankyrin repeat and BTB (POZ) domain containing 1	Consensus sequence	Hs.107812	80325	NP_115937 /// NP_742024 /// NP_742025	NM_032548 /// NM_172027 /// NM_172028 /// NR_033428 /// NR_033429
242567_PM_at	242567_at	ABTB1	ankyrin repeat and BTB (POZ) domain containing 1	Consensus sequence	Hs.107812	80325	NP_115937 /// NP_742024 /// NP_742025	NM_032548 /// NM_172027 /// NM_172028 /// NR_033428 /// NR_033429
232624_PM_at	232624_at	ABTB2	ankyrin repeat and BTB (POZ) domain containing 2	Consensus sequence	Hs.23361	25841	NP_665803	NM_145804
213497_PM_at	213497_at	ABTB2	ankyrin repeat and BTB (POZ) domain containing 2	Consensus sequence	Hs.23361	25841	NP_665803	NM_145804
202025_PM_x_at	202025_x_at	ACAA1	acetyl-CoA acyltransferase 1	Exemplar sequence	Hs.643487	30	NP_001123882 /// NP_001598	NM_001130410 /// NM_001607 /// NR_024024
214274_PM_s_at	214274_s_at	ACAA1	acetyl-CoA acyltransferase 1	Consensus sequence	Hs.643487	30	NP_001123882 /// NP_001598	NM_001130410 /// NM_001607 /// NR_024024
202002_PM_at	202002_at	ACAA2	acetyl-CoA acyltransferase 2	Consensus sequence	Hs.200136	10449	NP_006102	NM_006111
202003_PM_s_at	202003_s_at	ACAA2	acetyl-CoA acyltransferase 2	Exemplar sequence	Hs.200136	10449	NP_006102	NM_006111
212186_PM_at	212186_at	ACACA	acetyl-CoA carboxylase alpha	Consensus sequence	Hs.160556	31	NP_942131 /// NP_942133 /// NP_942134 /// NP_942135 /// NP_942136	NM_198834 /// NM_198836 /// NM_198837 /// NM_198838 /// NM_198839
214358_PM_at	214358_at	ACACA	acetyl-CoA carboxylase alpha	Consensus sequence	Hs.160556	31	NP_942131 /// NP_942133 /// NP_942134 /// NP_942135 /// NP_942136	NM_198834 /// NM_198836 /// NM_198837 /// NM_198838 /// NM_198839
43427_PM_at	43427_at	ACACB	acetyl-CoA carboxylase beta	Consensus sequence	Hs.234898	32	NP_001084	NM_001093
221928_PM_at	221928_at	ACACB	acetyl-CoA carboxylase beta	Consensus sequence	Hs.234898	32	NP_001084	NM_001093
49452_PM_at	49452_at	ACACB	acetyl-CoA carboxylase beta	Consensus sequence	Hs.234898	32	NP_001084	NM_001093
1552616_PM_a_at	1552616_a_at	ACACB	acetyl-CoA carboxylase beta	Consensus sequence	Hs.234898	32	NP_001084	NM_001093
214584_PM_x_at	214584_x_at	ACACB	acetyl-CoA carboxylase beta	Consensus sequence	Hs.234898	32	NP_001084	NM_001093
1552615_PM_at	1552615_at	ACACB	acetyl-CoA carboxylase beta	Consensus sequence	Hs.234898	32	NP_001084	NM_001093
237482_PM_s_at	237482_s_at	ACAD10	acyl-CoA dehydrogenase family, member 10	Consensus sequence	Hs.331141	80724	NP_001130010 /// NP_001130014 /// NP_079523	NM_001136538 /// NM_001136542 /// NM_025247
219986_PM_s_at	219986_s_at	ACAD10	acyl-CoA dehydrogenase family, member 10	Exemplar sequence	Hs.331141	80724	NP_001130010 /// NP_001130014 /// NP_079523	NM_001136538 /// NM_001136542 /// NM_025247
237481_PM_at	237481_at	ACAD10	acyl-CoA dehydrogenase family, member 10	Consensus sequence	Hs.331141	80724	NP_001130010 /// NP_001130014 /// NP_079523	NM_001136538 /// NM_001136542 /// NM_025247
238655_PM_at	238655_at	ACAD10	acyl-CoA dehydrogenase family, member 10	Consensus sequence	Hs.331141	80724	NP_001130010 /// NP_001130014 /// NP_079523	NM_001136538 /// NM_001136542 /// NM_025247
225573_PM_at	225573_at	ACAD11 /// NPHP3	acyl-CoA dehydrogenase family, member 11 /// nephronophthisis 3 (adolescent)	Consensus sequence	Hs.511991	27031 /// 84129	NP_115545 /// NP_694972	NM_032169 /// NM_153240
221669_PM_s_at	221669_s_at	ACAD8	acyl-CoA dehydrogenase family, member 8	Exemplar sequence	Hs.14791	27034	NP_055199	NM_014384
239976_PM_at	239976_at	ACAD9	Acyl-Coenzyme A dehydrogenase family, member 9	Consensus sequence	Hs.567482	28976	NP_054768	NM_014049 /// NR_033426
224160_PM_s_at	224160_s_at	ACAD9	acyl-CoA dehydrogenase family, member 9	Exemplar sequence	Hs.567482	28976	NP_054768	NM_014049 /// NR_033426
206069_PM_s_at	206069_s_at	ACADL	acyl-CoA dehydrogenase, long chain	Exemplar sequence	Hs.471277	33	NP_001599	NM_001608
206068_PM_s_at	206068_s_at	ACADL	acyl-CoA dehydrogenase, long chain	Consensus sequence	Hs.471277	33	NP_001599	NM_001608
202502_PM_at	202502_at	ACADM	acyl-CoA dehydrogenase, C-4 to C-12 straight chain	Exemplar sequence	Hs.445040	34	NP_000007 /// NP_001120800	NM_000016 /// NM_001127328
202366_PM_at	202366_at	ACADS	acyl-CoA dehydrogenase, C-2 to C-3 short chain	Exemplar sequence	Hs.507076	35	NP_000008	NM_000017
226030_PM_at	226030_at	ACADSB	acyl-CoA dehydrogenase, short/branched chain	Consensus sequence	Hs.81934	36	NP_001600	NM_001609
205355_PM_at	205355_at	ACADSB	acyl-CoA dehydrogenase, short/branched chain	Exemplar sequence	Hs.81934	36	NP_001600	NM_001609
200710_PM_at	200710_at	ACADVL	acyl-CoA dehydrogenase, very long chain	Exemplar sequence	Hs.437178	37	NP_000009 /// NP_001029031	NM_000018 /// NM_001033859
207692_PM_s_at	207692_s_at	ACAN	aggrecan	Exemplar sequence	Hs.2159	176	NP_001126 /// NP_037359	NM_001135 /// NM_013227
217161_PM_x_at	217161_x_at	ACAN	aggrecan	Consensus sequence	Hs.2159	176	NP_001126 /// NP_037359	NM_001135 /// NM_013227
1554950_PM_at	1554950_at	ACAN	aggrecan	Consensus sequence	Hs.2159	176	NP_001126 /// NP_037359	NM_001135 /// NM_013227
205679_PM_x_at	205679_x_at	ACAN	aggrecan	Exemplar sequence	Hs.2159	176	NP_001126 /// NP_037359	NM_001135 /// NM_013227
242081_PM_at	242081_at	ACAP1	ArfGAP with coiled-coil, ankyrin repeat and PH domains 1	Consensus sequence	Hs.337242	9744	NP_055531	NM_014716
205213_PM_at	205213_at	ACAP1	ArfGAP with coiled-coil, ankyrin repeat and PH domains 1	Exemplar sequence	Hs.337242	9744	NP_055531	NM_014716
205212_PM_s_at	205212_s_at	ACAP1	ArfGAP with coiled-coil, ankyrin repeat and PH domains 1	Exemplar sequence	Hs.337242	9744	NP_055531	NM_014716
1552472_PM_a_at	1552472_a_at	ACAP2	ArfGAP with coiled-coil, ankyrin repeat and PH domains 2	Consensus sequence	Hs.593373	23527	NP_036419	NM_012287
212476_PM_at	212476_at	ACAP2	ArfGAP with coiled-coil, ankyrin repeat and PH domains 2	Consensus sequence	Hs.593373	23527	NP_036419	NM_012287
225529_PM_at	225529_at	ACAP3	ArfGAP with coiled-coil, ankyrin repeat and PH domains 3	Consensus sequence	Hs.535257	116983	NP_085152	NM_030649
225542_PM_at	225542_at	ACAP3	ArfGAP with coiled-coil, ankyrin repeat and PH domains 3	Consensus sequence	Hs.535257	116983	NP_085152	NM_030649
205412_PM_at	205412_at	ACAT1	acetyl-CoA acetyltransferase 1	Exemplar sequence	Hs.232375	38	NP_000010	NM_000019
1559239_PM_s_at	1559239_s_at	ACAT1	acetyl-CoA acetyltransferase 1	Consensus sequence	Hs.232375	38	NP_000010	NM_000019
1554947_PM_at	1554947_at	ACAT1	acetyl-CoA acetyltransferase 1	Consensus sequence	Hs.232375	38	NP_000010	NM_000019
209608_PM_s_at	209608_s_at	ACAT2	acetyl-CoA acetyltransferase 2	Exemplar sequence	Hs.571037	39	NP_005882	NM_005891
202324_PM_s_at	202324_s_at	ACBD3	acyl-CoA binding domain containing 3	Exemplar sequence	Hs.520207	64746	NP_073572	NM_022735
202323_PM_s_at	202323_s_at	ACBD3	acyl-CoA binding domain containing 3	Consensus sequence	Hs.520207	64746	NP_073572	NM_022735
219413_PM_at	219413_at	ACBD4	acyl-CoA binding domain containing 4	Exemplar sequence	Hs.110298	79777	NP_001129176 /// NP_001129177 /// NP_001129178 /// NP_001129179 /// NP_078998	NM_001135704 /// NM_001135705 /// NM_001135706 /// NM_001135707 /// NM_024722
225663_PM_at	225663_at	ACBD5	acyl-CoA binding domain containing 5	Consensus sequence	Hs.530597	91452	NP_001035938 /// NP_663736	NM_001042473 /// NM_145698 /// NR_024150
1568877_PM_a_at	1568877_a_at	ACBD5	acyl-CoA binding domain containing 5	Consensus sequence	Hs.530597	91452	NP_001035938 /// NP_663736	NM_001042473 /// NM_145698 /// NR_024150
225317_PM_at	225317_at	ACBD6	acyl-CoA binding domain containing 6	Consensus sequence	Hs.200051	84320	NP_115736	NM_032360
206690_PM_at	206690_at	ACCN1	amiloride-sensitive cation channel 1, neuronal	Exemplar sequence	Hs.368417	40	NP_001085 /// NP_899233	NM_001094 /// NM_183377
37953_PM_s_at	37953_s_at	ACCN2	amiloride-sensitive cation channel 2, neuronal	Consensus sequence	Hs.274361	41	NP_001086 /// NP_064423	NM_001095 /// NM_020039
205156_PM_s_at	205156_s_at	ACCN2	amiloride-sensitive cation channel 2, neuronal	Exemplar sequence	Hs.274361	41	NP_001086 /// NP_064423	NM_001095 /// NM_020039
207561_PM_s_at	207561_s_at	ACCN3	amiloride-sensitive cation channel 3	Exemplar sequence	Hs.647113	9311	NP_004760 /// NP_064717 /// NP_064718	NM_004769 /// NM_020321 /// NM_020322
221226_PM_s_at	221226_s_at	ACCN4	amiloride-sensitive cation channel 4, pituitary	Exemplar sequence	Hs.87469	55515	NP_061144 /// NP_878267	NM_018674 /// NM_182847
1564504_PM_at	1564504_at	ACCN5	amiloride-sensitive cation channel 5, intestinal	Consensus sequence	Hs.381349	51802	NP_059115	NM_017419
228264_PM_at	228264_at	ACCS	1-aminocyclopropane-1-carboxylate synthase homolog (Arabidopsis)(non-functional)	Consensus sequence	Hs.126706	84680	NP_001120691 /// NP_115981	NM_001127219 /// NM_032592
204617_PM_s_at	204617_s_at	ACD	adrenocortical dysplasia homolog (mouse)	Exemplar sequence	Hs.78019	65057	NP_001075955 /// NP_001075956 /// NP_075065	NM_001082486 /// NM_001082487 /// NM_022914
209749_PM_s_at	209749_s_at	ACE	angiotensin I converting enzyme (peptidyl-dipeptidase A) 1	Consensus sequence	Hs.654434	1636	NP_000780 /// NP_001171528 /// NP_690043	NM_000789 /// NM_001178057 /// NM_152830
227463_PM_at	227463_at	ACE	angiotensin I converting enzyme (peptidyl-dipeptidase A) 1	Consensus sequence	Hs.654434	1636	NP_000780 /// NP_001171528 /// NP_690043	NM_000789 /// NM_001178057 /// NM_152830
219962_PM_at	219962_at	ACE2	angiotensin I converting enzyme (peptidyl-dipeptidase A) 2	Exemplar sequence	Hs.178098	59272	NP_068576	NM_021804
222257_PM_s_at	222257_s_at	ACE2	angiotensin I converting enzyme (peptidyl-dipeptidase A) 2	Consensus sequence	Hs.178098	59272	NP_068576	NM_021804
1553929_PM_at	1553929_at	ACER1	alkaline ceramidase 1	Consensus sequence	Hs.352609	125981	NP_597999	NM_133492
222687_PM_s_at	222687_s_at	ACER3	alkaline ceramidase 3	Consensus sequence	Hs.23862	55331	NP_060837	NM_018367
222688_PM_at	222688_at	ACER3	alkaline ceramidase 3	Consensus sequence	Hs.23862	55331	NP_060837	NM_018367
222689_PM_at	222689_at	ACER3	alkaline ceramidase 3	Consensus sequence	Hs.23862	55331	NP_060837	NM_018367
227776_PM_at	227776_at	ACER3	alkaline ceramidase 3	Consensus sequence	Hs.23862	55331	NP_060837	NM_018367
231321_PM_s_at	231321_s_at	ACER3	Alkaline ceramidase 3	Consensus sequence	Hs.23862	55331	NP_060837	NM_018367
205377_PM_s_at	205377_s_at	ACHE	acetylcholinesterase (Yt blood group)	Consensus sequence	Hs.154495	43	NP_000656 /// NP_056646	NM_000665 /// NM_015831
205378_PM_s_at	205378_s_at	ACHE	acetylcholinesterase (Yt blood group)	Exemplar sequence	Hs.154495	43	NP_000656 /// NP_056646	NM_000665 /// NM_015831
201715_PM_s_at	201715_s_at	ACIN1	apoptotic chromatin condensation inducer 1	Exemplar sequence	Hs.124490	22985	NP_001158286 /// NP_001158287 /// NP_001158288 /// NP_001158289 /// NP_055792	NM_001164814 /// NM_001164815 /// NM_001164816 /// NM_001164817 /// NM_014977
201127_PM_s_at	201127_s_at	ACLY	ATP citrate lyase	Consensus sequence	Hs.387567	47	NP_001087 /// NP_942127	NM_001096 /// NM_198830
201128_PM_s_at	201128_s_at	ACLY	ATP citrate lyase	Exemplar sequence	Hs.387567	47	NP_001087 /// NP_942127	NM_001096 /// NM_198830
210337_PM_s_at	210337_s_at	ACLY	ATP citrate lyase	Exemplar sequence	Hs.387567	47	NP_001087 /// NP_942127	NM_001096 /// NM_198830
230602_PM_at	230602_at	ACMSD	aminocarboxymuconate semialdehyde decarboxylase	Consensus sequence	Hs.655728	130013	NP_612199	NM_138326
218981_PM_at	218981_at	ACN9	ACN9 homolog (S. cerevisiae)	Exemplar sequence	Hs.592269	57001	NP_064571	NM_020186
207071_PM_s_at	207071_s_at	ACO1	aconitase 1, soluble	Exemplar sequence	Hs.567229	48	NP_002188	NM_002197
200793_PM_s_at	200793_s_at	ACO2	aconitase 2, mitochondrial	Exemplar sequence	Hs.643610	50	NP_001089	NM_001098
217307_PM_at	217307_at	ACO2	aconitase 2, mitochondrial	Consensus sequence	Hs.643610	50	NP_001089	NM_001098
202982_PM_s_at	202982_s_at	ACOT1 /// ACOT2	acyl-CoA thioesterase 1 /// acyl-CoA thioesterase 2	Exemplar sequence	Hs.568046	10965 /// 641371	NP_001032238 /// NP_006812	NM_001037161 /// NM_006821
216103_PM_at	216103_at	ACOT11	acyl-CoA thioesterase 11	Consensus sequence	Hs.724769	26027	NP_056362 /// NP_671517	NM_015547 /// NM_147161
1554938_PM_a_at	1554938_a_at	ACOT11	acyl-CoA thioesterase 11	Consensus sequence	Hs.724769	26027	NP_056362 /// NP_671517	NM_015547 /// NM_147161
1555321_PM_at	1555321_at	ACOT11	acyl-CoA thioesterase 11	Consensus sequence	Hs.724769	26027	NP_056362 /// NP_671517	NM_015547 /// NM_147161
214763_PM_at	214763_at	ACOT11	acyl-CoA thioesterase 11	Consensus sequence	Hs.724769	26027	NP_056362 /// NP_671517	NM_015547 /// NM_147161
238160_PM_at	238160_at	ACOT12	acyl-CoA thioesterase 12	Consensus sequence	Hs.591756	134526	NP_570123	NM_130767
204565_PM_at	204565_at	ACOT13	acyl-CoA thioesterase 13	Exemplar sequence	Hs.9676	55856	NP_001153566 /// NP_060943	NM_001160094 /// NM_018473
229534_PM_at	229534_at	ACOT4	acyl-CoA thioesterase 4	Consensus sequence	Hs.49433	122970	NP_689544	NM_152331
241949_PM_at	241949_at	ACOT6	acyl-CoA thioesterase 6	Consensus sequence	Hs.122038	641372	NP_001032239	NM_001037162
215728_PM_s_at	215728_s_at	ACOT7	acyl-CoA thioesterase 7	Consensus sequence	Hs.126137	11332	NP_009205 /// NP_863654 /// NP_863655 /// NP_863656	NM_007274 /// NM_181864 /// NM_181865 /// NM_181866
208002_PM_s_at	208002_s_at	ACOT7	acyl-CoA thioesterase 7	Exemplar sequence	Hs.126137	11332	NP_009205 /// NP_863654 /// NP_863655 /// NP_863656	NM_007274 /// NM_181864 /// NM_181865 /// NM_181866
204212_PM_at	204212_at	ACOT8	acyl-CoA thioesterase 8	Exemplar sequence	Hs.444776	10005	NP_005460 /// NP_899242	NM_005469 /// NM_183386
236514_PM_at	236514_at	ACOT8	acyl-CoA thioesterase 8	Consensus sequence	Hs.444776	10005	NP_005460 /// NP_899242	NM_005469 /// NM_183386
221641_PM_s_at	221641_s_at	ACOT9	acyl-CoA thioesterase 9	Exemplar sequence	Hs.298885	23597	NP_001028755 /// NP_001032248	NM_001033583 /// NM_001037171
209600_PM_s_at	209600_s_at	ACOX1	acyl-CoA oxidase 1, palmitoyl	Exemplar sequence	Hs.464137	51	NP_004026 /// NP_009223	NM_004035 /// NM_007292
207656_PM_s_at	207656_s_at	ACOX1	acyl-CoA oxidase 1, palmitoyl	Exemplar sequence	Hs.464137	51	NP_004026 /// NP_009223	NM_004035 /// NM_007292
213501_PM_at	213501_at	ACOX1	acyl-CoA oxidase 1, palmitoyl	Consensus sequence	Hs.464137	51	NP_004026 /// NP_009223	NM_004035 /// NM_007292
227962_PM_at	227962_at	ACOX1	acyl-CoA oxidase 1, palmitoyl	Consensus sequence	Hs.464137	51	NP_004026 /// NP_009223	NM_004035 /// NM_007292
209601_PM_at	209601_at	ACOX1	acyl-CoA oxidase 1, palmitoyl	Exemplar sequence	Hs.464137	51	NP_004026 /// NP_009223	NM_004035 /// NM_007292
205364_PM_at	205364_at	ACOX2	acyl-CoA oxidase 2, branched chain	Exemplar sequence	Hs.444959	8309	NP_003491	NM_003500
204241_PM_at	204241_at	ACOX3	acyl-CoA oxidase 3, pristanoyl	Consensus sequence	Hs.479122	8310	NP_001095137 /// NP_003492	NM_001101667 /// NM_003501
204242_PM_s_at	204242_s_at	ACOX3	acyl-CoA oxidase 3, pristanoyl	Exemplar sequence	Hs.479122	8310	NP_001095137 /// NP_003492	NM_001101667 /// NM_003501
220845_PM_at	220845_at	ACOXL	acyl-CoA oxidase-like	Exemplar sequence	Hs.253320	55289	NP_001098986 /// NP_001136279 /// NP_001136280	NM_001105516 /// NM_001142807 /// NM_001142808
240189_PM_at	240189_at	ACOXL	acyl-CoA oxidase-like	Consensus sequence	Hs.253320	55289	NP_001098986 /// NP_001136279 /// NP_001136280	NM_001105516 /// NM_001142807 /// NM_001142808
1554808_PM_at	1554808_at	ACP1	acid phosphatase 1, soluble	Consensus sequence	Hs.558296	52	NP_001035739 /// NP_004291 /// NP_009030	NM_001040649 /// NM_004300 /// NM_007099 /// NR_024080
215227_PM_x_at	215227_x_at	ACP1	acid phosphatase 1, soluble	Consensus sequence	Hs.558296	52	NP_001035739 /// NP_004291 /// NP_009030	NM_001040649 /// NM_004300 /// NM_007099 /// NR_024080
201630_PM_s_at	201630_s_at	ACP1	acid phosphatase 1, soluble	Exemplar sequence	Hs.558296	52	NP_001035739 /// NP_004291 /// NP_009030	NM_001040649 /// NM_004300 /// NM_007099 /// NR_024080
201629_PM_s_at	201629_s_at	ACP1	acid phosphatase 1, soluble	Consensus sequence	Hs.558296	52	NP_001035739 /// NP_004291 /// NP_009030	NM_001040649 /// NM_004300 /// NM_007099 /// NR_024080
202767_PM_at	202767_at	ACP2	acid phosphatase 2, lysosomal	Exemplar sequence	Hs.532492	53	NP_001124536 /// NP_001601	NM_001131064 /// NM_001610
204638_PM_at	204638_at	ACP5	acid phosphatase 5, tartrate resistant	Exemplar sequence	Hs.1211	54	NP_001104504 /// NP_001104505 /// NP_001104506 /// NP_001602	NM_001111034 /// NM_001111035 /// NM_001111036 /// NM_001611
218795_PM_at	218795_at	ACP6	acid phosphatase 6, lysophosphatidic	Exemplar sequence	Hs.562154	51205	NP_057445	NM_016361
239475_PM_at	239475_at	ACPL2	acid phosphatase-like 2	Consensus sequence	Hs.657887	92370	NP_001032249 /// NP_689495	NM_001037172 /// NM_152282
226925_PM_at	226925_at	ACPL2	acid phosphatase-like 2	Consensus sequence	Hs.657887	92370	NP_001032249 /// NP_689495	NM_001037172 /// NM_152282
204393_PM_s_at	204393_s_at	ACPP	acid phosphatase, prostate	Exemplar sequence	Hs.433060	55	NP_001090 /// NP_001127666	NM_001099 /// NM_001134194
237030_PM_at	237030_at	ACPP	acid phosphatase, prostate	Consensus sequence	Hs.433060	55	NP_001090 /// NP_001127666	NM_001099 /// NM_001134194
241715_PM_x_at	241715_x_at	ACPT	acid phosphatase, testicular	Consensus sequence	Hs.293394	93650	NP_149059	NM_033068
207427_PM_at	207427_at	ACR	acrosin	Exemplar sequence	Hs.370870	49	NP_001088	NM_001097
230833_PM_at	230833_at	ACRBP	acrosin binding protein	Consensus sequence	Hs.123239	84519	NP_115878	NM_032489
223718_PM_at	223718_at	ACRBP	acrosin binding protein	Exemplar sequence	Hs.123239	84519	NP_115878	NM_032489
223717_PM_s_at	223717_s_at	ACRBP	acrosin binding protein	Exemplar sequence	Hs.123239	84519	NP_115878	NM_032489
238825_PM_at	238825_at	ACRC	acidic repeat containing	Consensus sequence	Hs.135167	93953	NP_443189	NM_052957
207973_PM_x_at	207973_x_at	ACRV1	acrosomal vesicle protein 1	Exemplar sequence	Hs.169222	56	NP_001603 /// NP_064454 /// NP_064492 /// NP_064493 /// NP_064494 /// NP_064495 /// NP_064496 /// NP_064498 /// NP_064500	NM_001612 /// NM_020069 /// NM_020107 /// NM_020108 /// NM_020109 /// NM_020110 /// NM_020111 /// NM_020113 /// NM_020115
208013_PM_s_at	208013_s_at	ACRV1	acrosomal vesicle protein 1	Exemplar sequence	Hs.169222	56	NP_001603 /// NP_064454 /// NP_064492 /// NP_064493 /// NP_064494 /// NP_064495 /// NP_064496 /// NP_064498 /// NP_064500	NM_001612 /// NM_020069 /// NM_020107 /// NM_020108 /// NM_020109 /// NM_020110 /// NM_020111 /// NM_020113 /// NM_020115
207990_PM_x_at	207990_x_at	ACRV1	acrosomal vesicle protein 1	Exemplar sequence	Hs.169222	56	NP_001603 /// NP_064454 /// NP_064492 /// NP_064493 /// NP_064494 /// NP_064495 /// NP_064496 /// NP_064498 /// NP_064500	NM_001612 /// NM_020069 /// NM_020107 /// NM_020108 /// NM_020109 /// NM_020110 /// NM_020111 /// NM_020113 /// NM_020115
207991_PM_x_at	207991_x_at	ACRV1	acrosomal vesicle protein 1	Exemplar sequence	Hs.169222	56	NP_001603 /// NP_064454 /// NP_064492 /// NP_064493 /// NP_064494 /// NP_064495 /// NP_064496 /// NP_064498 /// NP_064500	NM_001612 /// NM_020069 /// NM_020107 /// NM_020108 /// NM_020109 /// NM_020110 /// NM_020111 /// NM_020113 /// NM_020115
206776_PM_x_at	206776_x_at	ACRV1	acrosomal vesicle protein 1	Exemplar sequence	Hs.169222	56	NP_001603 /// NP_064454 /// NP_064492 /// NP_064493 /// NP_064494 /// NP_064495 /// NP_064496 /// NP_064498 /// NP_064500	NM_001612 /// NM_020069 /// NM_020107 /// NM_020108 /// NM_020109 /// NM_020110 /// NM_020111 /// NM_020113 /// NM_020115
207969_PM_x_at	207969_x_at	ACRV1	acrosomal vesicle protein 1	Exemplar sequence	Hs.169222	56	NP_001603 /// NP_064454 /// NP_064492 /// NP_064493 /// NP_064494 /// NP_064495 /// NP_064496 /// NP_064498 /// NP_064500	NM_001612 /// NM_020069 /// NM_020107 /// NM_020108 /// NM_020109 /// NM_020110 /// NM_020111 /// NM_020113 /// NM_020115
206465_PM_at	206465_at	ACSBG1	acyl-CoA synthetase bubblegum family member 1	Consensus sequence	Hs.655760	23205	NP_055977	NM_015162
206466_PM_at	206466_at	ACSBG1	acyl-CoA synthetase bubblegum family member 1	Consensus sequence	Hs.655760	23205	NP_055977	NM_015162
221716_PM_s_at	221716_s_at	ACSBG2	acyl-CoA synthetase bubblegum family member 2	Exemplar sequence	Hs.465720	81616	NP_112186	NM_030924
218844_PM_at	218844_at	ACSF2	acyl-CoA synthetase family member 2	Exemplar sequence	Hs.288959	80221	NP_079425	NM_025149
227464_PM_at	227464_at	ACSF3	acyl-CoA synthetase family member 3	Consensus sequence	Hs.461727	197322	NP_001120686 /// NP_777577	NM_001127214 /// NM_174917 /// NR_023316
1556552_PM_a_at	1556552_a_at	ACSF3	acyl-CoA synthetase family member 3	Consensus sequence	Hs.461727	197322	NP_001120686 /// NP_777577	NM_001127214 /// NM_174917 /// NR_023316
201963_PM_at	201963_at	ACSL1	acyl-CoA synthetase long-chain family member 1	Exemplar sequence	Hs.406678	2180	NP_001986	NM_001995
207275_PM_s_at	207275_s_at	ACSL1	acyl-CoA synthetase long-chain family member 1	Exemplar sequence	Hs.406678	2180	NP_001986	NM_001995
201662_PM_s_at	201662_s_at	ACSL3	acyl-CoA synthetase long-chain family member 3	Exemplar sequence	Hs.655772	2181	NP_004448 /// NP_976251	NM_004457 /// NM_203372
201661_PM_s_at	201661_s_at	ACSL3	acyl-CoA synthetase long-chain family member 3	Exemplar sequence	Hs.655772	2181	NP_004448 /// NP_976251	NM_004457 /// NM_203372
201660_PM_at	201660_at	ACSL3	acyl-CoA synthetase long-chain family member 3	Consensus sequence	Hs.655772	2181	NP_004448 /// NP_976251	NM_004457 /// NM_203372
1557418_PM_at	1557418_at	ACSL4	Acyl-CoA synthetase long-chain family member 4	Consensus sequence	Hs.268785	2182	NP_004449 /// NP_075266	NM_004458 /// NM_022977
1557419_PM_a_at	1557419_a_at	ACSL4	Acyl-CoA synthetase long-chain family member 4	Consensus sequence	Hs.268785	2182	NP_004449 /// NP_075266	NM_004458 /// NM_022977
202422_PM_s_at	202422_s_at	ACSL4	acyl-CoA synthetase long-chain family member 4	Exemplar sequence	Hs.268785	2182	NP_004449 /// NP_075266	NM_004458 /// NM_022977
222592_PM_s_at	222592_s_at	ACSL5	acyl-CoA synthetase long-chain family member 5	Consensus sequence	Hs.11638	51703	NP_057318 /// NP_976313 /// NP_976314	NM_016234 /// NM_203379 /// NM_203380
218322_PM_s_at	218322_s_at	ACSL5	acyl-CoA synthetase long-chain family member 5	Exemplar sequence	Hs.11638	51703	NP_057318 /// NP_976313 /// NP_976314	NM_016234 /// NM_203379 /// NM_203380
213683_PM_at	213683_at	ACSL6	acyl-CoA synthetase long-chain family member 6	Consensus sequence	Hs.14945	23305	NP_001009185 /// NP_056071	NM_001009185 /// NM_015256
223918_PM_at	223918_at	ACSL6	acyl-CoA synthetase long-chain family member 6	Exemplar sequence	Hs.14945	23305	NP_001009185 /// NP_056071	NM_001009185 /// NM_015256
216409_PM_at	216409_at	ACSL6	Acyl-CoA synthetase long-chain family member 6	Consensus sequence	Hs.14945	23305	NP_001009185 /// NP_056071	NM_001009185 /// NM_015256
229725_PM_at	229725_at	ACSL6	Acyl-CoA synthetase long-chain family member 6	Consensus sequence	Hs.14945	23305	NP_001009185 /// NP_056071	NM_001009185 /// NM_015256
211207_PM_s_at	211207_s_at	ACSL6	acyl-CoA synthetase long-chain family member 6	Exemplar sequence	Hs.14945	23305	NP_001009185 /// NP_056071	NM_001009185 /// NM_015256
234197_PM_at	234197_at	ACSM1	acyl-CoA synthetase medium-chain family member 1	Consensus sequence	Hs.306812	116285	NP_443188	NM_052956
215432_PM_at	215432_at	ACSM1	acyl-CoA synthetase medium-chain family member 1	Consensus sequence	Hs.306812	116285	NP_443188	NM_052956
241914_PM_s_at	241914_s_at	ACSM2A /// ACSM2B	acyl-CoA synthetase medium-chain family member 2A /// acyl-CoA synthetase medium-chain family member 2B	Consensus sequence	Hs.298252	123876 /// 348158	NP_001010845 /// NP_001098539 /// NP_872423	NM_001010845 /// NM_001105069 /// NM_182617
241915_PM_at	241915_at	ACSM2A /// ACSM2B	acyl-CoA synthetase medium-chain family member 2A /// acyl-CoA synthetase medium-chain family member 2B	Consensus sequence	Hs.298252	123876 /// 348158	NP_001010845 /// NP_001098539 /// NP_872423	NM_001010845 /// NM_001105069 /// NM_182617
214069_PM_at	214069_at	ACSM2A /// ACSM2B /// LOC100291873	acyl-CoA synthetase medium-chain family member 2A /// acyl-CoA synthetase medium-chain family member 2B /// similar to Acyl-coenzyme A synthetase ACSM2B, mitochondrial	Consensus sequence	Hs.298252	100291873 /// 123876 /// 348158	NP_001010845 /// NP_001098539 /// NP_872423 /// XP_002345007 /// XP_002345008	NM_001010845 /// NM_001105069 /// NM_182617 /// XM_002344966 /// XM_002344967
230554_PM_at	230554_at	ACSM2A /// ACSM2B /// LOC100291873	acyl-CoA synthetase medium-chain family member 2A /// acyl-CoA synthetase medium-chain family member 2B /// similar to Acyl-coenzyme A synthetase ACSM2B, mitochondrial	Consensus sequence	Hs.298252	100291873 /// 123876 /// 348158	NP_001010845 /// NP_001098539 /// NP_872423 /// XP_002345007 /// XP_002345008	NM_001010845 /// NM_001105069 /// NM_182617 /// XM_002344966 /// XM_002344967
210377_PM_at	210377_at	ACSM3	acyl-CoA synthetase medium-chain family member 3	Exemplar sequence	Hs.706754	6296	NP_005613 /// NP_973729	NM_005622 /// NM_202000
205942_PM_s_at	205942_s_at	ACSM3	acyl-CoA synthetase medium-chain family member 3	Exemplar sequence	Hs.706754	6296	NP_005613 /// NP_973729	NM_005622 /// NM_202000
1554514_PM_at	1554514_at	ACSM5	acyl-CoA synthetase medium-chain family member 5	Consensus sequence	Hs.659606	54988	NP_060358	NM_017888
89977_PM_at	89977_at	ACSM5	acyl-CoA synthetase medium-chain family member 5	Consensus sequence	Hs.659606	54988	NP_060358	NM_017888
220061_PM_at	220061_at	ACSM5	acyl-CoA synthetase medium-chain family member 5	Exemplar sequence	Hs.659606	54988	NP_060358	NM_017888
234801_PM_s_at	234801_s_at	ACSS1	acyl-CoA synthetase short-chain family member 1	Consensus sequence	Hs.529353	84532	NP_115890	NM_032501
235724_PM_at	235724_at	ACSS1	Acyl-CoA synthetase short-chain family member 1	Consensus sequence	Hs.529353	84532	NP_115890	NM_032501
234484_PM_s_at	234484_s_at	ACSS1	acyl-CoA synthetase short-chain family member 1	Consensus sequence	Hs.529353	84532	NP_115890	NM_032501
224882_PM_at	224882_at	ACSS1	acyl-CoA synthetase short-chain family member 1	Consensus sequence	Hs.529353	84532	NP_115890	NM_032501
234483_PM_at	234483_at	ACSS1	acyl-CoA synthetase short-chain family member 1	Consensus sequence	Hs.529353	84532	NP_115890	NM_032501
234312_PM_s_at	234312_s_at	ACSS2	acyl-CoA synthetase short-chain family member 2	Consensus sequence	Hs.517034	55902	NP_001070020 /// NP_061147	NM_001076552 /// NM_018677 /// NR_028046
229222_PM_at	229222_at	ACSS3	acyl-CoA synthetase short-chain family member 3	Consensus sequence	Hs.259559	79611	NP_078836	NM_024560
219616_PM_at	219616_at	ACSS3	acyl-CoA synthetase short-chain family member 3	Exemplar sequence	Hs.259559	79611	NP_078836	NM_024560
203872_PM_at	203872_at	ACTA1	actin, alpha 1, skeletal muscle	Exemplar sequence	Hs.1288	58	NP_001091	NM_001100
243140_PM_at	243140_at	ACTA2	Actin, alpha 2, smooth muscle, aorta	Consensus sequence	Hs.500483	59	NP_001135417 /// NP_001604	NM_001141945 /// NM_001613
215787_PM_at	215787_at	ACTA2	Actin, alpha 2, smooth muscle, aorta	Consensus sequence	Hs.500483	59	NP_001135417 /// NP_001604	NM_001141945 /// NM_001613
200974_PM_at	200974_at	ACTA2	actin, alpha 2, smooth muscle, aorta	Exemplar sequence	Hs.500483	59	NP_001135417 /// NP_001604	NM_001141945 /// NM_001613
AFFX-HSAC07/X00351_3_at	AFFX-HSAC07/X00351_3_at	ACTB	actin, beta	Control sequence	Hs.520640	60	NP_001092	NM_001101
AFFX-HSAC07/X00351_5_at	AFFX-HSAC07/X00351_5_at	ACTB	actin, beta	Control sequence	Hs.520640	60	NP_001092	NM_001101
AFFX-HSAC07/X00351_M_at	AFFX-HSAC07/X00351_M_at	ACTB	actin, beta	Control sequence	Hs.520640	60	NP_001092	NM_001101
200801_PM_x_at	200801_x_at	ACTB	actin, beta	Exemplar sequence	Hs.520640	60	NP_001092	NM_001101
213867_PM_x_at	213867_x_at	ACTB	actin, beta	Consensus sequence	Hs.520640	60	NP_001092	NM_001101
224594_PM_x_at	224594_x_at	ACTB	actin, beta	Consensus sequence	Hs.520640	60	NP_001092	NM_001101
205132_PM_at	205132_at	ACTC1	actin, alpha, cardiac muscle 1	Exemplar sequence	Hs.118127	70	NP_005150	NM_005159
224585_PM_x_at	224585_x_at	ACTG1	actin, gamma 1	Consensus sequence	Hs.514581	71	NP_001605	NM_001614
211983_PM_x_at	211983_x_at	ACTG1	actin, gamma 1	Consensus sequence	Hs.514581	71	NP_001605	NM_001614
211970_PM_x_at	211970_x_at	ACTG1	actin, gamma 1	Consensus sequence	Hs.514581	71	NP_001605	NM_001614
212988_PM_x_at	212988_x_at	ACTG1	actin, gamma 1	Consensus sequence	Hs.514581	71	NP_001605	NM_001614
212363_PM_x_at	212363_x_at	ACTG1	actin, gamma 1	Consensus sequence	Hs.514581	71	NP_001605	NM_001614
211995_PM_x_at	211995_x_at	ACTG1	actin, gamma 1	Consensus sequence	Hs.514581	71	NP_001605	NM_001614
221607_PM_x_at	221607_x_at	ACTG1	actin, gamma 1	Exemplar sequence	Hs.514581	71	NP_001605	NM_001614
213214_PM_x_at	213214_x_at	ACTG1	actin, gamma 1	Consensus sequence	Hs.514581	71	NP_001605	NM_001614
201550_PM_x_at	201550_x_at	ACTG1	actin, gamma 1	Exemplar sequence	Hs.514581	71	NP_001605	NM_001614
241148_PM_at	241148_at	ACTG2	actin, gamma 2, smooth muscle, enteric	Consensus sequence	Hs.516105	72	NP_001606	NM_001615
202274_PM_at	202274_at	ACTG2	actin, gamma 2, smooth muscle, enteric	Exemplar sequence	Hs.516105	72	NP_001606	NM_001615
202666_PM_s_at	202666_s_at	ACTL6A	actin-like 6A	Exemplar sequence	Hs.435326	86	NP_004292 /// NP_817126 /// NP_829888	NM_004301 /// NM_177989 /// NM_178042
206013_PM_s_at	206013_s_at	ACTL6B	actin-like 6B	Exemplar sequence	Hs.259831	51412	NP_057272	NM_016188
206014_PM_at	206014_at	ACTL6B	actin-like 6B	Exemplar sequence	Hs.259831	51412	NP_057272	NM_016188
220501_PM_at	220501_at	ACTL7A	actin-like 7A	Exemplar sequence	Hs.123530	10881	NP_006678	NM_006687
220498_PM_at	220498_at	ACTL7B	actin-like 7B	Exemplar sequence	Hs.534390	10880	NP_006677	NM_006686
214957_PM_at	214957_at	ACTL8	actin-like 8	Consensus sequence	Hs.2149	81569	NP_110439	NM_030812
243208_PM_x_at	243208_x_at	ACTL9	actin-like 9	Consensus sequence	Hs.209206	284382	NP_848620	NM_178525
208637_PM_x_at	208637_x_at	ACTN1	actinin, alpha 1	Exemplar sequence	Hs.509765	87	NP_001093 /// NP_001123476 /// NP_001123477	NM_001102 /// NM_001130004 /// NM_001130005
237401_PM_at	237401_at	ACTN1	Actinin, alpha 1	Consensus sequence	Hs.509765	87	NP_001093 /// NP_001123476 /// NP_001123477	NM_001102 /// NM_001130004 /// NM_001130005
208636_PM_at	208636_at	ACTN1	actinin, alpha 1	Consensus sequence	Hs.509765	87	NP_001093 /// NP_001123476 /// NP_001123477	NM_001102 /// NM_001130004 /// NM_001130005
211160_PM_x_at	211160_x_at	ACTN1	actinin, alpha 1	Exemplar sequence	Hs.509765	87	NP_001093 /// NP_001123476 /// NP_001123477	NM_001102 /// NM_001130004 /// NM_001130005
203861_PM_s_at	203861_s_at	ACTN2	actinin, alpha 2	Consensus sequence	Hs.498178	88	NP_001094	NM_001103
203864_PM_s_at	203864_s_at	ACTN2	actinin, alpha 2	Exemplar sequence	Hs.498178	88	NP_001094	NM_001103
203863_PM_at	203863_at	ACTN2	actinin, alpha 2	Consensus sequence	Hs.498178	88	NP_001094	NM_001103
203862_PM_s_at	203862_s_at	ACTN2	actinin, alpha 2	Consensus sequence	Hs.498178	88	NP_001094	NM_001103
206891_PM_at	206891_at	ACTN3	actinin, alpha 3	Exemplar sequence	Hs.654432	89	NP_001095	NM_001104
200601_PM_at	200601_at	ACTN4	actinin, alpha 4	Exemplar sequence	Hs.270291	81	NP_004915	NM_004924
222230_PM_s_at	222230_s_at	ACTR10	actin-related protein 10 homolog (S. cerevisiae)	Consensus sequence	Hs.509451	55860	NP_060947	NM_018477
200720_PM_s_at	200720_s_at	ACTR1A	ARP1 actin-related protein 1 homolog A, centractin alpha (yeast)	Consensus sequence	Hs.153961	10121	NP_005727	NM_005736
200721_PM_s_at	200721_s_at	ACTR1A	ARP1 actin-related protein 1 homolog A, centractin alpha (yeast)	Exemplar sequence	Hs.153961	10121	NP_005727	NM_005736
202135_PM_s_at	202135_s_at	ACTR1B	ARP1 actin-related protein 1 homolog B, centractin beta (yeast)	Exemplar sequence	Hs.98791	10120	NP_005726	NM_005735
200729_PM_s_at	200729_s_at	ACTR2	ARP2 actin-related protein 2 homolog (yeast)	Exemplar sequence	Hs.723952	10097	NP_001005386 /// NP_005713	NM_001005386 /// NM_005722
234212_PM_at	234212_at	ACTR2	ARP2 actin-related protein 2 homolog (yeast)	Consensus sequence	Hs.723952	10097	NP_001005386 /// NP_005713	NM_001005386 /// NM_005722
234210_PM_x_at	234210_x_at	ACTR2	ARP2 actin-related protein 2 homolog (yeast)	Consensus sequence	Hs.723952	10097	NP_001005386 /// NP_005713	NM_001005386 /// NM_005722
200728_PM_at	200728_at	ACTR2	ARP2 actin-related protein 2 homolog (yeast)	Consensus sequence	Hs.723952	10097	NP_001005386 /// NP_005713	NM_001005386 /// NM_005722
200727_PM_s_at	200727_s_at	ACTR2	ARP2 actin-related protein 2 homolog (yeast)	Consensus sequence	Hs.723952	10097	NP_001005386 /// NP_005713	NM_001005386 /// NM_005722
1554390_PM_s_at	1554390_s_at	ACTR2	ARP2 actin-related protein 2 homolog (yeast)	Consensus sequence	Hs.723952	10097	NP_001005386 /// NP_005713	NM_001005386 /// NM_005722
1558015_PM_s_at	1558015_s_at	ACTR2	ARP2 actin-related protein 2 homolog (yeast)	Consensus sequence	Hs.723952	10097	NP_001005386 /// NP_005713	NM_001005386 /// NM_005722
213101_PM_s_at	213101_s_at	ACTR3	ARP3 actin-related protein 3 homolog (yeast)	Consensus sequence	Hs.433512	10096	NP_005712	NM_005721
200996_PM_at	200996_at	ACTR3	ARP3 actin-related protein 3 homolog (yeast)	Exemplar sequence	Hs.433512	10096	NP_005712	NM_005721
228603_PM_at	228603_at	ACTR3	ARP3 actin-related protein 3 homolog (yeast)	Consensus sequence	Hs.433512	10096	NP_005712	NM_005721
213102_PM_at	213102_at	ACTR3	ARP3 actin-related protein 3 homolog (yeast)	Consensus sequence	Hs.433512	10096	NP_005712	NM_005721
239170_PM_at	239170_at	ACTR3	ARP3 actin-related protein 3 homolog (yeast)	Consensus sequence	Hs.433512	10096	NP_005712	NM_005721
218868_PM_at	218868_at	ACTR3B	ARP3 actin-related protein 3 homolog B (yeast)	Exemplar sequence	Hs.647117	57180	NP_001035225 /// NP_065178	NM_001040135 /// NM_020445
1555487_PM_a_at	1555487_a_at	ACTR3B /// LOC100290215	ARP3 actin-related protein 3 homolog B (yeast) /// similar to actin-related protein 3-beta	Consensus sequence	Hs.647117	100290215 /// 57180	NP_001035225 /// NP_065178 /// XP_002346994	NM_001040135 /// NM_020445 /// XM_002346953
223874_PM_at	223874_at	ACTR3C	ARP3 actin-related protein 3 homolog C (yeast)	Exemplar sequence	Hs.664579	653857	NP_001157930 /// NP_001157931 /// XP_002342834 /// XP_002344443 /// XP_002346107	NM_001164458 /// NM_001164459 /// XM_002342793 /// XM_002344402 /// XM_002346066
219623_PM_at	219623_at	ACTR5	ARP5 actin-related protein 5 homolog (yeast)	Exemplar sequence	Hs.371585	79913	NP_079131	NM_024855
222147_PM_s_at	222147_s_at	ACTR5	ARP5 actin-related protein 5 homolog (yeast)	Consensus sequence	Hs.371585	79913	NP_079131	NM_024855
218395_PM_at	218395_at	ACTR6	ARP6 actin-related protein 6 homolog (yeast)	Exemplar sequence	Hs.115088	64431	NP_071941	NM_022496
241794_PM_at	241794_at	ACTR6	ARP6 actin-related protein 6 homolog (yeast)	Consensus sequence	Hs.115088	64431	NP_071941	NM_022496
218658_PM_s_at	218658_s_at	ACTR8	ARP8 actin-related protein 8 homolog (yeast)	Exemplar sequence	Hs.412186	93973	NP_075050	NM_022899
222707_PM_s_at	222707_s_at	ACTR8	ARP8 actin-related protein 8 homolog (yeast)	Consensus sequence	Hs.412186	93973	NP_075050	NM_022899
237360_PM_at	237360_at	ACTRT2	actin-related protein T2	Consensus sequence	Hs.236635	140625	NP_536356	NM_080431
203935_PM_at	203935_at	ACVR1	activin A receptor, type I	Exemplar sequence	Hs.470316	90	NP_001096 /// NP_001104537	NM_001105 /// NM_001111067
205209_PM_at	205209_at	ACVR1B	activin A receptor, type IB	Exemplar sequence	Hs.438918	91	NP_004293 /// NP_064732 /// NP_064733	NM_004302 /// NM_020327 /// NM_020328
208219_PM_at	208219_at	ACVR1B	activin A receptor, type IB	Exemplar sequence	Hs.438918	91	NP_004293 /// NP_064732 /// NP_064733	NM_004302 /// NM_020327 /// NM_020328
208218_PM_s_at	208218_s_at	ACVR1B	activin A receptor, type IB	Exemplar sequence	Hs.438918	91	NP_004293 /// NP_064732 /// NP_064733	NM_004302 /// NM_020327 /// NM_020328
208222_PM_at	208222_at	ACVR1B	activin A receptor, type IB	Exemplar sequence	Hs.438918	91	NP_004293 /// NP_064732 /// NP_064733	NM_004302 /// NM_020327 /// NM_020328
213198_PM_at	213198_at	ACVR1B	activin A receptor, type IB	Consensus sequence	Hs.438918	91	NP_004293 /// NP_064732 /// NP_064733	NM_004302 /// NM_020327 /// NM_020328
208223_PM_s_at	208223_s_at	ACVR1B	activin A receptor, type IB	Exemplar sequence	Hs.438918	91	NP_004293 /// NP_064732 /// NP_064733	NM_004302 /// NM_020327 /// NM_020328
1552519_PM_at	1552519_at	ACVR1C	activin A receptor, type IC	Consensus sequence	Hs.562901	130399	NP_001104501 /// NP_001104502 /// NP_001104503 /// NP_660302	NM_001111031 /// NM_001111032 /// NM_001111033 /// NM_145259
1563182_PM_at	1563182_at	ACVR1C	activin A receptor, type IC	Consensus sequence	Hs.562901	130399	NP_001104501 /// NP_001104502 /// NP_001104503 /// NP_660302	NM_001111031 /// NM_001111032 /// NM_001111033 /// NM_145259
228416_PM_at	228416_at	ACVR2A	activin A receptor, type IIA	Consensus sequence	Hs.470174	92	NP_001607	NM_001616
205327_PM_s_at	205327_s_at	ACVR2A	activin A receptor, type IIA	Exemplar sequence	Hs.470174	92	NP_001607	NM_001616
1559548_PM_at	1559548_at	ACVR2B	activin A receptor, type IIB	Consensus sequence	Hs.174273	93	NP_001097	NM_001106
236126_PM_at	236126_at	ACVR2B	activin A receptor, type IIB	Consensus sequence	Hs.174273	93	NP_001097	NM_001106
220028_PM_at	220028_at	ACVR2B	activin A receptor, type IIB	Exemplar sequence	Hs.174273	93	NP_001097	NM_001106
210838_PM_s_at	210838_s_at	ACVRL1	activin A receptor type II-like 1	Exemplar sequence	Hs.591026	94	NP_000011 /// NP_001070869	NM_000020 /// NM_001077401
226950_PM_at	226950_at	ACVRL1	activin A receptor type II-like 1	Consensus sequence	Hs.591026	94	NP_000011 /// NP_001070869	NM_000020 /// NM_001077401
202740_PM_at	202740_at	ACY1	aminoacylase 1	Exemplar sequence	Hs.334707	95	NP_000657	NM_000666
238849_PM_at	238849_at	ACY1	Aminoacylase 1	Consensus sequence	Hs.334707	95	NP_000657	NM_000666
1554974_PM_at	1554974_at	ACY3	aspartoacylase (aminocyclase) 3	Consensus sequence	Hs.126265	91703	NP_542389	NM_080658
230481_PM_at	230481_at	ACY3	aspartoacylase (aminocyclase) 3	Consensus sequence	Hs.126265	91703	NP_542389	NM_080658
205260_PM_s_at	205260_s_at	ACYP1	acylphosphatase 1, erythrocyte (common) type	Exemplar sequence	Hs.18573	97	NP_001098 /// NP_982355	NM_001107 /// NM_203488
206833_PM_s_at	206833_s_at	ACYP2	acylphosphatase 2, muscle type	Exemplar sequence	Hs.516173	98	NP_612457	NM_138448
204639_PM_at	204639_at	ADA	adenosine deaminase	Exemplar sequence	Hs.654536	100	NP_000013	NM_000022
216705_PM_s_at	216705_s_at	ADA	adenosine deaminase	Consensus sequence	Hs.654536	100	NP_000013	NM_000022
240299_PM_at	240299_at	ADAD1	Adenosine deaminase domain containing 1 (testis-specific)	Consensus sequence	Hs.518957	132612	NP_001152757 /// NP_001152767 /// NP_640336	NM_001159285 /// NM_001159295 /// NM_139243
231448_PM_at	231448_at	ADAD1	adenosine deaminase domain containing 1 (testis-specific)	Consensus sequence	Hs.518957	132612	NP_001152757 /// NP_001152767 /// NP_640336	NM_001159285 /// NM_001159295 /// NM_139243
236463_PM_at	236463_at	ADAD2	adenosine deaminase domain containing 2	Consensus sequence	Hs.8977	161931	NP_001138872 /// NP_631913	NM_001145400 /// NM_139174
238424_PM_at	238424_at	ADAL	adenosine deaminase-like	Consensus sequence	Hs.533913	161823	NP_001012987 /// NP_001152752	NM_001012969 /// NM_001159280
239711_PM_at	239711_at	ADAL	adenosine deaminase-like	Consensus sequence	Hs.533913	161823	NP_001012987 /// NP_001152752	NM_001012969 /// NM_001159280
202604_PM_x_at	202604_x_at	ADAM10	ADAM metallopeptidase domain 10	Exemplar sequence	Hs.578508	102	NP_001101	NM_001110
214895_PM_s_at	214895_s_at	ADAM10	ADAM metallopeptidase domain 10	Consensus sequence	Hs.578508	102	NP_001101	NM_001110
202603_PM_at	202603_at	ADAM10	ADAM metallopeptidase domain 10	Consensus sequence	Hs.578508	102	NP_001101	NM_001110
239837_PM_at	239837_at	ADAM11	ADAM metallopeptidase domain 11	Consensus sequence	Hs.6088	4185	NP_002381	NM_002390
207880_PM_at	207880_at	ADAM11	ADAM metallopeptidase domain 11	Exemplar sequence	Hs.6088	4185	NP_002381	NM_002390
215613_PM_at	215613_at	ADAM12	ADAM metallopeptidase domain 12	Consensus sequence	Hs.594537	8038	NP_003465 /// NP_067673	NM_003474 /// NM_021641
213790_PM_at	213790_at	ADAM12	ADAM metallopeptidase domain 12	Consensus sequence	Hs.594537	8038	NP_003465 /// NP_067673	NM_003474 /// NM_021641
204943_PM_at	204943_at	ADAM12	ADAM metallopeptidase domain 12	Exemplar sequence	Hs.594537	8038	NP_003465 /// NP_067673	NM_003474 /// NM_021641
202952_PM_s_at	202952_s_at	ADAM12	ADAM metallopeptidase domain 12	Exemplar sequence	Hs.594537	8038	NP_003465 /// NP_067673	NM_003474 /// NM_021641
217007_PM_s_at	217007_s_at	ADAM15	ADAM metallopeptidase domain 15	Consensus sequence	Hs.312098	8751	NP_003806 /// NP_997074 /// NP_997077 /// NP_997078 /// NP_997079 /// NP_997080	NM_003815 /// NM_207191 /// NM_207194 /// NM_207195 /// NM_207196 /// NM_207197
1555896_PM_a_at	1555896_a_at	ADAM15	ADAM metallopeptidase domain 15	Consensus sequence	Hs.312098	8751	NP_003806 /// NP_997074 /// NP_997077 /// NP_997078 /// NP_997079 /// NP_997080	NM_003815 /// NM_207191 /// NM_207194 /// NM_207195 /// NM_207196 /// NM_207197
205745_PM_x_at	205745_x_at	ADAM17	ADAM metallopeptidase domain 17	Exemplar sequence	Hs.404914	6868	NP_003174	NM_003183
237897_PM_at	237897_at	ADAM17	ADAM metallopeptidase domain 17	Consensus sequence	Hs.404914	6868	NP_003174	NM_003183
205746_PM_s_at	205746_s_at	ADAM17	ADAM metallopeptidase domain 17	Exemplar sequence	Hs.404914	6868	NP_003174	NM_003183
213532_PM_at	213532_at	ADAM17	ADAM metallopeptidase domain 17	Consensus sequence	Hs.404914	6868	NP_003174	NM_003183
207597_PM_at	207597_at	ADAM18	ADAM metallopeptidase domain 18	Exemplar sequence	Hs.127930	8749	NP_055052	NM_014237
1568970_PM_at	1568970_at	ADAM18	ADAM metallopeptidase domain 18	Consensus sequence	Hs.127930	8749	NP_055052	NM_014237
209765_PM_at	209765_at	ADAM19	ADAM metallopeptidase domain 19 (meltrin beta)	Consensus sequence	Hs.483944	8728	NP_075525 /// NP_150377	NM_023038 /// NM_033274
221128_PM_at	221128_at	ADAM19	ADAM metallopeptidase domain 19 (meltrin beta)	Exemplar sequence	Hs.483944	8728	NP_075525 /// NP_150377	NM_023038 /// NM_033274
207664_PM_at	207664_at	ADAM2	ADAM metallopeptidase domain 2	Exemplar sequence	Hs.177959	2515	NP_001455	NM_001464
207422_PM_at	207422_at	ADAM20	ADAM metallopeptidase domain 20	Exemplar sequence	Hs.177984	8748	NP_003805	NM_003814
207423_PM_s_at	207423_s_at	ADAM20	ADAM metallopeptidase domain 20	Exemplar sequence	Hs.177984	8748	NP_003805	NM_003814
1552579_PM_a_at	1552579_a_at	ADAM21	ADAM metallopeptidase domain 21	Consensus sequence	Hs.178748	8747	NP_003804	NM_003813
207665_PM_at	207665_at	ADAM21 /// ADAM21P1	ADAM metallopeptidase domain 21 /// ADAM metallopeptidase domain 21 pseudogene 1	Exemplar sequence	Hs.712468	145241 /// 8747	NP_003804	NM_003813 /// NR_003951
208237_PM_x_at	208237_x_at	ADAM22	ADAM metallopeptidase domain 22	Exemplar sequence	Hs.592282	53616	NP_004185 /// NP_057435 /// NP_068367 /// NP_068368 /// NP_068369	NM_004194 /// NM_016351 /// NM_021721 /// NM_021722 /// NM_021723
244194_PM_at	244194_at	ADAM22	ADAM metallopeptidase domain 22	Consensus sequence	Hs.592282	53616	NP_004185 /// NP_057435 /// NP_068367 /// NP_068368 /// NP_068369	NM_004194 /// NM_016351 /// NM_021721 /// NM_021722 /// NM_021723
206615_PM_s_at	206615_s_at	ADAM22	ADAM metallopeptidase domain 22	Exemplar sequence	Hs.592282	53616	NP_004185 /// NP_057435 /// NP_068367 /// NP_068368 /// NP_068369	NM_004194 /// NM_016351 /// NM_021721 /// NM_021722 /// NM_021723
208227_PM_x_at	208227_x_at	ADAM22	ADAM metallopeptidase domain 22	Exemplar sequence	Hs.592282	53616	NP_004185 /// NP_057435 /// NP_068367 /// NP_068368 /// NP_068369	NM_004194 /// NM_016351 /// NM_021721 /// NM_021722 /// NM_021723
208226_PM_x_at	208226_x_at	ADAM22	ADAM metallopeptidase domain 22	Exemplar sequence	Hs.592282	53616	NP_004185 /// NP_057435 /// NP_068367 /// NP_068368 /// NP_068369	NM_004194 /// NM_016351 /// NM_021721 /// NM_021722 /// NM_021723
1555024_PM_at	1555024_at	ADAM22	ADAM metallopeptidase domain 22	Consensus sequence	Hs.592282	53616	NP_004185 /// NP_057435 /// NP_068367 /// NP_068368 /// NP_068369	NM_004194 /// NM_016351 /// NM_021721 /// NM_021722 /// NM_021723
206616_PM_s_at	206616_s_at	ADAM22	ADAM metallopeptidase domain 22	Exemplar sequence	Hs.592282	53616	NP_004185 /// NP_057435 /// NP_068367 /// NP_068368 /// NP_068369	NM_004194 /// NM_016351 /// NM_021721 /// NM_021722 /// NM_021723
244463_PM_at	244463_at	ADAM23	ADAM metallopeptidase domain 23	Consensus sequence	Hs.591643	8745	NP_003803	NM_003812
206046_PM_at	206046_at	ADAM23	ADAM metallopeptidase domain 23	Exemplar sequence	Hs.591643	8745	NP_003803	NM_003812
1559268_PM_at	1559268_at	ADAM23	ADAM metallopeptidase domain 23	Consensus sequence	Hs.591643	8745	NP_003803	NM_003812
241446_PM_at	241446_at	ADAM28	ADAM metallopeptidase domain 28	Consensus sequence	Hs.174030	10863	NP_055080 /// NP_068547	NM_014265 /// NM_021777
208268_PM_at	208268_at	ADAM28	ADAM metallopeptidase domain 28	Exemplar sequence	Hs.174030	10863	NP_055080 /// NP_068547	NM_014265 /// NM_021777
205997_PM_at	205997_at	ADAM28	ADAM metallopeptidase domain 28	Exemplar sequence	Hs.174030	10863	NP_055080 /// NP_068547	NM_014265 /// NM_021777
208269_PM_s_at	208269_s_at	ADAM28	ADAM metallopeptidase domain 28	Exemplar sequence	Hs.174030	10863	NP_055080 /// NP_068547	NM_014265 /// NM_021777
221337_PM_s_at	221337_s_at	ADAM29	ADAM metallopeptidase domain 29	Exemplar sequence	Hs.126838	11086	NP_001124175 /// NP_001124176 /// NP_001124177 /// NP_055084	NM_001130703 /// NM_001130704 /// NM_001130705 /// NM_014269
221446_PM_at	221446_at	ADAM30	ADAM metallopeptidase domain 30	Exemplar sequence	Hs.283011	11085	NP_068566	NM_021794
243520_PM_x_at	243520_x_at	ADAM30	ADAM metallopeptidase domain 30	Consensus sequence	Hs.283011	11085	NP_068566	NM_021794
1552266_PM_at	1552266_at	ADAM32	ADAM metallopeptidase domain 32	Consensus sequence	Hs.521545	203102	NP_659441	NM_145004
233868_PM_x_at	233868_x_at	ADAM33	ADAM metallopeptidase domain 33	Consensus sequence	Hs.173716	80332	NP_079496 /// NP_694882	NM_025220 /// NM_153202
232570_PM_s_at	232570_s_at	ADAM33	ADAM metallopeptidase domain 33	Consensus sequence	Hs.173716	80332	NP_079496 /// NP_694882	NM_025220 /// NM_153202
216276_PM_s_at	216276_s_at	ADAM3A	ADAM metallopeptidase domain 3A (cyritestin 1)	Consensus sequence	Hs.98848	1587	---	NR_001569 /// NR_024106 /// NR_024107
217003_PM_s_at	217003_s_at	ADAM5P	ADAM metallopeptidase domain 5, pseudogene	Consensus sequence	Hs.369765	255926	---	NR_001448
216998_PM_s_at	216998_s_at	ADAM5P	ADAM metallopeptidase domain 5, pseudogene	Consensus sequence	Hs.369765	255926	---	NR_001448
237909_PM_at	237909_at	ADAM6	ADAM metallopeptidase domain 6 (pseudogene)	Consensus sequence	Hs.662288	8755	---	NR_002224
239079_PM_at	239079_at	ADAM7	ADAM metallopeptidase domain 7	Consensus sequence	Hs.116147	8756	NP_003808	NM_003817
211238_PM_at	211238_at	ADAM7	ADAM metallopeptidase domain 7	Exemplar sequence	Hs.116147	8756	NP_003808	NM_003817
211239_PM_s_at	211239_s_at	ADAM7	ADAM metallopeptidase domain 7	Exemplar sequence	Hs.116147	8756	NP_003808	NM_003817
205180_PM_s_at	205180_s_at	ADAM8	ADAM metallopeptidase domain 8	Exemplar sequence	Hs.720760	101	NP_001100 /// NP_001157961 /// NP_001157962	NM_001109 /// NM_001164489 /// NM_001164490
205179_PM_s_at	205179_s_at	ADAM8	ADAM metallopeptidase domain 8	Consensus sequence	Hs.720760	101	NP_001100 /// NP_001157961 /// NP_001157962	NM_001109 /// NM_001164489 /// NM_001164490
1555326_PM_a_at	1555326_a_at	ADAM9	ADAM metallopeptidase domain 9 (meltrin gamma)	Consensus sequence	Hs.591852	8754	NP_001005845 /// NP_003807	NM_001005845 /// NM_003816 /// NR_027638 /// NR_027639 /// NR_027878
202381_PM_at	202381_at	ADAM9	ADAM metallopeptidase domain 9 (meltrin gamma)	Exemplar sequence	Hs.591852	8754	NP_001005845 /// NP_003807	NM_001005845 /// NM_003816 /// NR_027638 /// NR_027639 /// NR_027878
1570042_PM_a_at	1570042_a_at	ADAM9	ADAM metallopeptidase domain 9 (meltrin gamma)	Consensus sequence	Hs.591852	8754	NP_001005845 /// NP_003807	NM_001005845 /// NM_003816 /// NR_027638 /// NR_027639 /// NR_027878
206134_PM_at	206134_at	ADAMDEC1	ADAM-like, decysin 1	Exemplar sequence	Hs.521459	27299	NP_001138743 /// NP_001138744 /// NP_055294	NM_001145271 /// NM_001145272 /// NM_014479
222486_PM_s_at	222486_s_at	ADAMTS1	ADAM metallopeptidase with thrombospondin type 1 motif, 1	Exemplar sequence	Hs.643357	9510	NP_008919	NM_006988
222162_PM_s_at	222162_s_at	ADAMTS1	ADAM metallopeptidase with thrombospondin type 1 motif, 1	Consensus sequence	Hs.643357	9510	NP_008919	NM_006988
232133_PM_at	232133_at	ADAMTS10	ADAM metallopeptidase with thrombospondin type 1 motif, 10	Consensus sequence	Hs.657508	81794	NP_112219	NM_030957
230341_PM_x_at	230341_x_at	ADAMTS10	ADAM metallopeptidase with thrombospondin type 1 motif, 10	Consensus sequence	Hs.657508	81794	NP_112219	NM_030957
226997_PM_at	226997_at	ADAMTS12	ADAM metallopeptidase with thrombospondin type 1 motif, 12	Consensus sequence	Hs.12680	81792	NP_112217	NM_030955
221421_PM_s_at	221421_s_at	ADAMTS12	ADAM metallopeptidase with thrombospondin type 1 motif, 12	Exemplar sequence	Hs.12680	81792	NP_112217	NM_030955
220208_PM_at	220208_at	ADAMTS13	ADAM metallopeptidase with thrombospondin type 1 motif, 13	Exemplar sequence	Hs.131433	11093	NP_620594 /// NP_620595 /// NP_620596	NM_139025 /// NM_139026 /// NM_139027 /// NR_024514
223844_PM_at	223844_at	ADAMTS13	ADAM metallopeptidase with thrombospondin type 1 motif, 13	Exemplar sequence	Hs.131433	11093	NP_620594 /// NP_620595 /// NP_620596	NM_139025 /// NM_139026 /// NM_139027 /// NR_024514
230167_PM_at	230167_at	ADAMTS14	ADAM metallopeptidase with thrombospondin type 1 motif, 14	Consensus sequence	Hs.352156	140766	NP_542453 /// NP_631894	NM_080722 /// NM_139155
1553427_PM_at	1553427_at	ADAMTS15	ADAM metallopeptidase with thrombospondin type 1 motif, 15	Consensus sequence	Hs.681791	170689	NP_620686	NM_139055
229004_PM_at	229004_at	ADAMTS15	ADAM metallopeptidase with thrombospondin type 1 motif, 15	Consensus sequence	Hs.681791	170689	NP_620686	NM_139055
238125_PM_at	238125_at	ADAMTS16	ADAM metallopeptidase with thrombospondin type 1 motif, 16	Consensus sequence	Hs.661915	170690	NP_620687	NM_139056
1552727_PM_s_at	1552727_s_at	ADAMTS17	ADAM metallopeptidase with thrombospondin type 1 motif, 17	Consensus sequence	Hs.513200	170691	NP_620688	NM_139057
1552726_PM_at	1552726_at	ADAMTS17	ADAM metallopeptidase with thrombospondin type 1 motif, 17	Consensus sequence	Hs.513200	170691	NP_620688	NM_139057
1552725_PM_s_at	1552725_s_at	ADAMTS17	ADAM metallopeptidase with thrombospondin type 1 motif, 17	Consensus sequence	Hs.513200	170691	NP_620688	NM_139057
230040_PM_at	230040_at	ADAMTS18	ADAM metallopeptidase with thrombospondin type 1 motif, 18	Consensus sequence	Hs.188746	170692	NP_955387	NM_199355
242823_PM_at	242823_at	ADAMTS18	ADAM metallopeptidase with thrombospondin type 1 motif, 18	Consensus sequence	Hs.188746	170692	NP_955387	NM_199355
1553234_PM_at	1553234_at	ADAMTS18	ADAM metallopeptidase with thrombospondin type 1 motif, 18	Consensus sequence	Hs.188746	170692	NP_955387	NM_199355
1553180_PM_at	1553180_at	ADAMTS19	ADAM metallopeptidase with thrombospondin type 1 motif, 19	Consensus sequence	Hs.23751	171019	NP_598377	NM_133638
1553179_PM_at	1553179_at	ADAMTS19	ADAM metallopeptidase with thrombospondin type 1 motif, 19	Consensus sequence	Hs.23751	171019	NP_598377	NM_133638
214535_PM_s_at	214535_s_at	ADAMTS2	ADAM metallopeptidase with thrombospondin type 1 motif, 2	Consensus sequence	Hs.591725	9509	NP_055059 /// NP_067610	NM_014244 /// NM_021599
214454_PM_at	214454_at	ADAMTS2	ADAM metallopeptidase with thrombospondin type 1 motif, 2	Consensus sequence	Hs.591725	9509	NP_055059 /// NP_067610	NM_014244 /// NM_021599
220717_PM_at	220717_at	ADAMTS20	ADAM metallopeptidase with thrombospondin type 1 motif, 20	Exemplar sequence	Hs.287554	80070	NP_079279	NM_025003
1553409_PM_at	1553409_at	ADAMTS20	ADAM metallopeptidase with thrombospondin type 1 motif, 20	Consensus sequence	Hs.287554	80070	NP_079279	NM_025003
214913_PM_at	214913_at	ADAMTS3	ADAM metallopeptidase with thrombospondin type 1 motif, 3	Consensus sequence	Hs.590919	9508	NP_055058	NM_014243
1555380_PM_at	1555380_at	ADAMTS4	ADAM metallopeptidase with thrombospondin type 1 motif, 4	Consensus sequence	Hs.211604	9507	NP_005090	NM_005099
229357_PM_at	229357_at	ADAMTS5	ADAM metallopeptidase with thrombospondin type 1 motif, 5	Consensus sequence	Hs.58324	11096	NP_008969	NM_007038
235368_PM_at	235368_at	ADAMTS5	ADAM metallopeptidase with thrombospondin type 1 motif, 5	Consensus sequence	Hs.58324	11096	NP_008969	NM_007038
1558636_PM_s_at	1558636_s_at	ADAMTS5	ADAM metallopeptidase with thrombospondin type 1 motif, 5	Consensus sequence	Hs.58324	11096	NP_008969	NM_007038
219935_PM_at	219935_at	ADAMTS5	ADAM metallopeptidase with thrombospondin type 1 motif, 5	Exemplar sequence	Hs.58324	11096	NP_008969	NM_007038
1570351_PM_at	1570351_at	ADAMTS6	ADAM metallopeptidase with thrombospondin type 1 motif, 6	Consensus sequence	Hs.482291	11174	NP_922932	NM_197941
220866_PM_at	220866_at	ADAMTS6	ADAM metallopeptidase with thrombospondin type 1 motif, 6	Exemplar sequence	Hs.482291	11174	NP_922932	NM_197941
237411_PM_at	237411_at	ADAMTS6	ADAM metallopeptidase with thrombospondin type 1 motif, 6	Consensus sequence	Hs.482291	11174	NP_922932	NM_197941
220705_PM_s_at	220705_s_at	ADAMTS7	ADAM metallopeptidase with thrombospondin type 1 motif, 7	Exemplar sequence	Hs.16441	11173	NP_055087	NM_014272
228911_PM_at	228911_at	ADAMTS7	ADAM metallopeptidase with thrombospondin type 1 motif, 7	Consensus sequence	Hs.16441	11173	NP_055087	NM_014272
220706_PM_at	220706_at	ADAMTS7	ADAM metallopeptidase with thrombospondin type 1 motif, 7	Exemplar sequence	Hs.16441	11173	NP_055087	NM_014272
235649_PM_at	235649_at	ADAMTS8	ADAM metallopeptidase with thrombospondin type 1 motif, 8	Consensus sequence	Hs.271605	11095	NP_008968	NM_007037
220677_PM_s_at	220677_s_at	ADAMTS8	ADAM metallopeptidase with thrombospondin type 1 motif, 8	Exemplar sequence	Hs.271605	11095	NP_008968	NM_007037
220676_PM_at	220676_at	ADAMTS8	ADAM metallopeptidase with thrombospondin type 1 motif, 8	Exemplar sequence	Hs.271605	11095	NP_008968	NM_007037
1554697_PM_at	1554697_at	ADAMTS9	ADAM metallopeptidase with thrombospondin type 1 motif, 9	Consensus sequence	Hs.656071	56999	NP_891550	NM_182920
220287_PM_at	220287_at	ADAMTS9	ADAM metallopeptidase with thrombospondin type 1 motif, 9	Exemplar sequence	Hs.656071	56999	NP_891550	NM_182920
226814_PM_at	226814_at	ADAMTS9	ADAM metallopeptidase with thrombospondin type 1 motif, 9	Consensus sequence	Hs.656071	56999	NP_891550	NM_182920
233785_PM_at	233785_at	ADAMTS9	ADAM metallopeptidase with thrombospondin type 1 motif, 9	Consensus sequence	Hs.656071	56999	NP_891550	NM_182920
237217_PM_at	237217_at	ADAMTSL1	ADAMTS-like 1	Consensus sequence	Hs.522019	92949	NP_001035362 /// NP_443098	NM_001040272 /// NM_052866
239909_PM_at	239909_at	ADAMTSL1	ADAMTS-like 1	Consensus sequence	Hs.522019	92949	NP_001035362 /// NP_443098	NM_001040272 /// NM_052866
1552457_PM_a_at	1552457_a_at	ADAMTSL1	ADAMTS-like 1	Consensus sequence	Hs.522019	92949	NP_001035362 /// NP_443098	NM_001040272 /// NM_052866
1552808_PM_at	1552808_at	ADAMTSL1	ADAMTS-like 1	Consensus sequence	Hs.522019	92949	NP_001035362 /// NP_443098	NM_001040272 /// NM_052866
224371_PM_at	224371_at	ADAMTSL1	ADAMTS-like 1	Exemplar sequence	Hs.522019	92949	NP_001035362 /// NP_443098	NM_001040272 /// NM_052866
229585_PM_at	229585_at	ADAMTSL1	ADAMTS-like 1	Consensus sequence	Hs.522019	92949	NP_001035362 /// NP_443098	NM_001040272 /// NM_052866
206629_PM_at	206629_at	ADAMTSL2	ADAMTS-like 2	Exemplar sequence	Hs.522543	9719	NP_001138792 /// NP_055509	NM_001145320 /// NM_014694
213974_PM_at	213974_at	ADAMTSL3	ADAMTS-like 3	Consensus sequence	Hs.459162	57188	NP_997400	NM_207517
1559748_PM_at	1559748_at	ADAMTSL3	ADAMTS-like 3	Consensus sequence	Hs.459162	57188	NP_997400	NM_207517
226071_PM_at	226071_at	ADAMTSL4	ADAMTS-like 4	Consensus sequence	Hs.719991	54507	NP_061905 /// NP_079284	NM_019032 /// NM_025008
220578_PM_at	220578_at	ADAMTSL4	ADAMTS-like 4	Exemplar sequence	Hs.719991	54507	NP_061905 /// NP_079284	NM_019032 /// NM_025008
242200_PM_at	242200_at	ADAMTSL5	ADAMTS-like 5	Consensus sequence	Hs.371674	339366	NP_998769	NM_213604
219150_PM_s_at	219150_s_at	ADAP1	ArfGAP with dual PH domains 1	Exemplar sequence	Hs.644629	11033	NP_006860	NM_006869
90265_PM_at	90265_at	ADAP1	ArfGAP with dual PH domains 1	Consensus sequence	Hs.644629	11033	NP_006860	NM_006869
222876_PM_s_at	222876_s_at	ADAP2	ArfGAP with dual PH domains 2	Consensus sequence	Hs.514063	55803	NP_060874	NM_018404
219358_PM_s_at	219358_s_at	ADAP2	ArfGAP with dual PH domains 2	Exemplar sequence	Hs.514063	55803	NP_060874	NM_018404
201786_PM_s_at	201786_s_at	ADAR	adenosine deaminase, RNA-specific	Exemplar sequence	Hs.12341	103	NP_001020278 /// NP_001102 /// NP_056655 /// NP_056656	NM_001025107 /// NM_001111 /// NM_015840 /// NM_015841
234539_PM_at	234539_at	ADARB1	Adenosine deaminase, RNA-specific, B1 (RED1 homolog rat)	Consensus sequence	Hs.474018	104	NP_001028221 /// NP_001103 /// NP_001138879 /// NP_001153702 /// NP_056648 /// NP_056649	NM_001033049 /// NM_001112 /// NM_001145407 /// NM_001160230 /// NM_015833 /// NM_015834 /// NR_027672 /// NR_027673 /// NR_027674
203865_PM_s_at	203865_s_at	ADARB1	adenosine deaminase, RNA-specific, B1 (RED1 homolog rat)	Exemplar sequence	Hs.474018	104	NP_001028221 /// NP_001103 /// NP_001138879 /// NP_001153702 /// NP_056648 /// NP_056649	NM_001033049 /// NM_001112 /// NM_001145407 /// NM_001160230 /// NM_015833 /// NM_015834 /// NR_027672 /// NR_027673 /// NR_027674
209979_PM_at	209979_at	ADARB1	adenosine deaminase, RNA-specific, B1 (RED1 homolog rat)	Exemplar sequence	Hs.474018	104	NP_001028221 /// NP_001103 /// NP_001138879 /// NP_001153702 /// NP_056648 /// NP_056649	NM_001033049 /// NM_001112 /// NM_001145407 /// NM_001160230 /// NM_015833 /// NM_015834 /// NR_027672 /// NR_027673 /// NR_027674
234799_PM_at	234799_at	ADARB1	Adenosine deaminase, RNA-specific, B1 (RED1 homolog rat)	Consensus sequence	Hs.474018	104	NP_001028221 /// NP_001103 /// NP_001138879 /// NP_001153702 /// NP_056648 /// NP_056649	NM_001033049 /// NM_001112 /// NM_001145407 /// NM_001160230 /// NM_015833 /// NM_015834 /// NR_027672 /// NR_027673 /// NR_027674
207999_PM_s_at	207999_s_at	ADARB1	adenosine deaminase, RNA-specific, B1 (RED1 homolog rat)	Exemplar sequence	Hs.474018	104	NP_001028221 /// NP_001103 /// NP_001138879 /// NP_001153702 /// NP_056648 /// NP_056649	NM_001033049 /// NM_001112 /// NM_001145407 /// NM_001160230 /// NM_015833 /// NM_015834 /// NR_027672 /// NR_027673 /// NR_027674
220648_PM_at	220648_at	ADARB2	adenosine deaminase, RNA-specific, B2 (RED2 homolog rat)	Exemplar sequence	Hs.657984	105	NP_061172	NM_018702
237437_PM_s_at	237437_s_at	ADARB2	adenosine deaminase, RNA-specific, B2 (RED2 homolog rat)	Consensus sequence	Hs.657984	105	NP_061172	NM_018702
219384_PM_s_at	219384_s_at	ADAT1	adenosine deaminase, tRNA-specific 1	Exemplar sequence	Hs.188661	23536	NP_036223	NM_012091
236817_PM_at	236817_at	ADAT2	adenosine deaminase, tRNA-specific 2, TAD2 homolog (S. cerevisiae)	Consensus sequence	Hs.709561	134637	NP_872309	NM_182503
227213_PM_at	227213_at	ADAT2	adenosine deaminase, tRNA-specific 2, TAD2 homolog (S. cerevisiae)	Consensus sequence	Hs.709561	134637	NP_872309	NM_182503
1553968_PM_a_at	1553968_a_at	ADAT3	adenosine deaminase, tRNA-specific 3, TAD3 homolog (S. cerevisiae)	Consensus sequence	---	113179	NP_612431	NM_138422
1553967_PM_at	1553967_at	ADAT3	adenosine deaminase, tRNA-specific 3, TAD3 homolog (S. cerevisiae)	Consensus sequence	---	113179	NP_612431	NM_138422
230634_PM_x_at	230634_x_at	ADAT3	adenosine deaminase, tRNA-specific 3, TAD3 homolog (S. cerevisiae)	Consensus sequence	---	113179	NP_612431	NM_138422
228000_PM_at	228000_at	ADC	arginine decarboxylase	Consensus sequence	Hs.101807	113451	NP_443724	NM_052998
1554393_PM_a_at	1554393_a_at	ADC	arginine decarboxylase	Consensus sequence	Hs.101807	113451	NP_443724	NM_052998
227482_PM_at	227482_at	ADCK1	aarF domain containing kinase 1	Consensus sequence	Hs.413208	57143	NP_001136017 /// NP_065154	NM_001142545 /// NM_020421
44120_PM_at	44120_at	ADCK2	aarF domain containing kinase 2	Consensus sequence	Hs.534141	90956	NP_443085	NM_052853
222117_PM_s_at	222117_s_at	ADCK2	aarF domain containing kinase 2	Consensus sequence	Hs.534141	90956	NP_443085	NM_052853
221893_PM_s_at	221893_s_at	ADCK2	aarF domain containing kinase 2	Consensus sequence	Hs.534141	90956	NP_443085	NM_052853
221894_PM_at	221894_at	ADCK2	aarF domain containing kinase 2	Consensus sequence	Hs.534141	90956	NP_443085	NM_052853
227324_PM_at	227324_at	ADCK4	aarF domain containing kinase 4	Consensus sequence	Hs.130712	79934	NP_001136027 /// NP_079152	NM_001142555 /// NM_024876
220434_PM_at	220434_at	ADCK4	aarF domain containing kinase 4	Exemplar sequence	Hs.130712	79934	NP_001136027 /// NP_079152	NM_001142555 /// NM_024876
228524_PM_at	228524_at	ADCK5	aarF domain containing kinase 5	Consensus sequence	Hs.283374	203054	NP_777582	NM_174922
235049_PM_at	235049_at	ADCY1	adenylate cyclase 1 (brain)	Consensus sequence	Hs.192215	107	NP_066939	NM_021116
232062_PM_at	232062_at	ADCY1	adenylate cyclase 1 (brain)	Consensus sequence	Hs.192215	107	NP_066939	NM_021116
215348_PM_at	215348_at	ADCY1	adenylate cyclase 1 (brain)	Consensus sequence	Hs.192215	107	NP_066939	NM_021116
213245_PM_at	213245_at	ADCY1	adenylate cyclase 1 (brain)	Consensus sequence	Hs.192215	107	NP_066939	NM_021116
215340_PM_at	215340_at	ADCY1	adenylate cyclase 1 (brain)	Consensus sequence	Hs.192215	107	NP_066939	NM_021116
214547_PM_at	214547_at	ADCY10	adenylate cyclase 10 (soluble)	Consensus sequence	Hs.320892	55811	NP_001161221 /// NP_060887	NM_001167749 /// NM_018417
217305_PM_s_at	217305_s_at	ADCY10	adenylate cyclase 10 (soluble)	Consensus sequence	Hs.320892	55811	NP_001161221 /// NP_060887	NM_001167749 /// NM_018417
213219_PM_at	213219_at	ADCY2	adenylate cyclase 2 (brain)	Consensus sequence	Hs.481545	108	NP_065433	NM_020546
217687_PM_at	217687_at	ADCY2	adenylate cyclase 2 (brain)	Consensus sequence	Hs.481545	108	NP_065433	NM_020546
213217_PM_at	213217_at	ADCY2	adenylate cyclase 2 (brain)	Consensus sequence	Hs.481545	108	NP_065433	NM_020546
209320_PM_at	209320_at	ADCY3	adenylate cyclase 3	Exemplar sequence	Hs.467898	109	NP_004027	NM_004036
209321_PM_s_at	209321_s_at	ADCY3	adenylate cyclase 3	Exemplar sequence	Hs.467898	109	NP_004027	NM_004036
230800_PM_at	230800_at	ADCY4	adenylate cyclase 4	Consensus sequence	Hs.443428	196883	NP_640340	NM_139247
228182_PM_at	228182_at	ADCY5	adenylate cyclase 5	Consensus sequence	Hs.593293	111	NP_899200	NM_183357
242891_PM_at	242891_at	ADCY5	Adenylate cyclase 5	Consensus sequence	Hs.655144	111	NP_899200	NM_183357
209195_PM_s_at	209195_s_at	ADCY6	adenylate cyclase 6	Exemplar sequence	Hs.525401	112	NP_056085 /// NP_066193	NM_015270 /// NM_020983
1554827_PM_a_at	1554827_a_at	ADCY7	adenylate cyclase 7	Consensus sequence	Hs.513578	113	NP_001105	NM_001114
203741_PM_s_at	203741_s_at	ADCY7	adenylate cyclase 7	Exemplar sequence	Hs.513578	113	NP_001105	NM_001114
206811_PM_at	206811_at	ADCY8	adenylate cyclase 8 (brain)	Exemplar sequence	Hs.591859	114	NP_001106	NM_001115
204497_PM_at	204497_at	ADCY9	adenylate cyclase 9	Consensus sequence	Hs.391860	115	NP_001107	NM_001116
204498_PM_s_at	204498_s_at	ADCY9	adenylate cyclase 9	Exemplar sequence	Hs.391860	115	NP_001107	NM_001116
215400_PM_x_at	215400_x_at	ADCY9	Adenylate cyclase 9	Consensus sequence	Hs.391860	115	NP_001107	NM_001116
206281_PM_at	206281_at	ADCYAP1	adenylate cyclase activating polypeptide 1 (pituitary)	Exemplar sequence	Hs.531719	116	NP_001093203 /// NP_001108	NM_001099733 /// NM_001117
230237_PM_at	230237_at	ADCYAP1	adenylate cyclase activating polypeptide 1 (pituitary)	Consensus sequence	Hs.531719	116	NP_001093203 /// NP_001108	NM_001099733 /// NM_001117
207151_PM_at	207151_at	ADCYAP1R1	adenylate cyclase activating polypeptide 1 (pituitary) receptor type I	Exemplar sequence	Hs.377783	117	NP_001109	NM_001118
226690_PM_at	226690_at	ADCYAP1R1	Adenylate cyclase activating polypeptide 1 (pituitary) receptor type I	Consensus sequence	Hs.377783	117	NP_001109	NM_001118
214726_PM_x_at	214726_x_at	ADD1	adducin 1 (alpha)	Consensus sequence	Hs.183706	118	NP_001110 /// NP_054908 /// NP_054909 /// NP_789771	NM_001119 /// NM_014189 /// NM_014190 /// NM_176801
214736_PM_s_at	214736_s_at	ADD1	adducin 1 (alpha)	Consensus sequence	Hs.183706	118	NP_001110 /// NP_054908 /// NP_054909 /// NP_789771	NM_001119 /// NM_014189 /// NM_014190 /// NM_176801
238939_PM_at	238939_at	ADD1	adducin 1 (alpha)	Consensus sequence	Hs.183706	118	NP_001110 /// NP_054908 /// NP_054909 /// NP_789771	NM_001119 /// NM_014189 /// NM_014190 /// NM_176801
208030_PM_s_at	208030_s_at	ADD1	adducin 1 (alpha)	Exemplar sequence	Hs.183706	118	NP_001110 /// NP_054908 /// NP_054909 /// NP_789771	NM_001119 /// NM_014189 /// NM_014190 /// NM_176801
205268_PM_s_at	205268_s_at	ADD2	adducin 2 (beta)	Exemplar sequence	Hs.188528	119	NP_001608 /// NP_059516 /// NP_059517 /// NP_059518 /// NP_059522	NM_001617 /// NM_017482 /// NM_017483 /// NM_017484 /// NM_017488
206807_PM_s_at	206807_s_at	ADD2	adducin 2 (beta)	Exemplar sequence	Hs.188528	119	NP_001608 /// NP_059516 /// NP_059517 /// NP_059518 /// NP_059522	NM_001617 /// NM_017482 /// NM_017483 /// NM_017484 /// NM_017488
230988_PM_at	230988_at	ADD2	adducin 2 (beta)	Consensus sequence	Hs.188528	119	NP_001608 /// NP_059516 /// NP_059517 /// NP_059518 /// NP_059522	NM_001617 /// NM_017482 /// NM_017483 /// NM_017484 /// NM_017488
239530_PM_at	239530_at	ADD2	adducin 2 (beta)	Consensus sequence	Hs.188528	119	NP_001608 /// NP_059516 /// NP_059517 /// NP_059518 /// NP_059522	NM_001617 /// NM_017482 /// NM_017483 /// NM_017484 /// NM_017488
237336_PM_at	237336_at	ADD2	adducin 2 (beta)	Consensus sequence	Hs.188528	119	NP_001608 /// NP_059516 /// NP_059517 /// NP_059518 /// NP_059522	NM_001617 /// NM_017482 /// NM_017483 /// NM_017484 /// NM_017488
201753_PM_s_at	201753_s_at	ADD3	adducin 3 (gamma)	Exemplar sequence	Hs.501012	120	NP_001112 /// NP_058432 /// NP_063968	NM_001121 /// NM_016824 /// NM_019903
201752_PM_s_at	201752_s_at	ADD3	adducin 3 (gamma)	Consensus sequence	Hs.501012	120	NP_001112 /// NP_058432 /// NP_063968	NM_001121 /// NM_016824 /// NM_019903
201034_PM_at	201034_at	ADD3	adducin 3 (gamma)	Consensus sequence	Hs.501012	120	NP_001112 /// NP_058432 /// NP_063968	NM_001121 /// NM_016824 /// NM_019903
205882_PM_x_at	205882_x_at	ADD3	adducin 3 (gamma)	Consensus sequence	Hs.501012	120	NP_001112 /// NP_058432 /// NP_063968	NM_001121 /// NM_016824 /// NM_019903
207820_PM_at	207820_at	ADH1A	alcohol dehydrogenase 1A (class I), alpha polypeptide	Exemplar sequence	Hs.654433	124	NP_000658	NM_000667
209612_PM_s_at	209612_s_at	ADH1B	alcohol dehydrogenase 1B (class I), beta polypeptide	Exemplar sequence	Hs.4	125	NP_000659	NM_000668
209614_PM_at	209614_at	ADH1B	alcohol dehydrogenase 1B (class I), beta polypeptide	Exemplar sequence	Hs.4	125	NP_000659	NM_000668
209613_PM_s_at	209613_s_at	ADH1B	alcohol dehydrogenase 1B (class I), beta polypeptide	Exemplar sequence	Hs.4	125	NP_000659	NM_000668
243544_PM_at	243544_at	ADH1B	Alcohol dehydrogenase 1B (class I), beta polypeptide	Consensus sequence	Hs.4	125	NP_000659	NM_000668
206262_PM_at	206262_at	ADH1C	alcohol dehydrogenase 1C (class I), gamma polypeptide	Exemplar sequence	Hs.654537	126	NP_000660	NM_000669
231678_PM_s_at	231678_s_at	ADH4	alcohol dehydrogenase 4 (class II), pi polypeptide	Consensus sequence	Hs.1219	127	NP_000661	NM_000670
231703_PM_s_at	231703_s_at	ADH4	Alcohol dehydrogenase 4 (class II), pi polypeptide	Consensus sequence	Hs.1219	127	NP_000661	NM_000670
231675_PM_s_at	231675_s_at	ADH4	alcohol dehydrogenase 4 (class II), pi polypeptide	Consensus sequence	Hs.1219	127	NP_000661	NM_000670
223781_PM_x_at	223781_x_at	ADH4	alcohol dehydrogenase 4 (class II), pi polypeptide	Exemplar sequence	Hs.1219	127	NP_000661	NM_000670
208848_PM_at	208848_at	ADH5	alcohol dehydrogenase 5 (class III), chi polypeptide	Exemplar sequence	Hs.78989	128	NP_000662	NM_000671
208847_PM_s_at	208847_s_at	ADH5	alcohol dehydrogenase 5 (class III), chi polypeptide	Exemplar sequence	Hs.78989	128	NP_000662	NM_000671
207544_PM_s_at	207544_s_at	ADH6	alcohol dehydrogenase 6 (class V)	Exemplar sequence	Hs.586161	130	NP_000663 /// NP_001095940	NM_000672 /// NM_001102470
214261_PM_s_at	214261_s_at	ADH6	alcohol dehydrogenase 6 (class V)	Consensus sequence	Hs.586161	130	NP_000663 /// NP_001095940	NM_000672 /// NM_001102470
210505_PM_at	210505_at	ADH7	alcohol dehydrogenase 7 (class IV), mu or sigma polypeptide	Exemplar sequence	Hs.389	131	NP_000664 /// NP_001159976	NM_000673 /// NM_001166504
227113_PM_at	227113_at	ADHFE1	alcohol dehydrogenase, iron containing, 1	Consensus sequence	Hs.720023	137872	NP_653251	NM_144650
217761_PM_at	217761_at	ADI1	acireductone dioxygenase 1	Exemplar sequence	Hs.502773	55256	NP_060739	NM_018269
222400_PM_s_at	222400_s_at	ADI1	acireductone dioxygenase 1	Exemplar sequence	Hs.502773	55256	NP_060739	NM_018269
1554129_PM_a_at	1554129_a_at	ADIG	adipogenin	Consensus sequence	Hs.368028	149685	NP_001018092	NM_001018082
1554128_PM_at	1554128_at	ADIG	adipogenin	Consensus sequence	Hs.368028	149685	NP_001018092	NM_001018082
207175_PM_at	207175_at	ADIPOQ	adiponectin, C1Q and collagen domain containing	Exemplar sequence	Hs.80485	9370	NP_001171271 /// NP_004788	NM_001177800 /// NM_004797
217748_PM_at	217748_at	ADIPOR1	adiponectin receptor 1	Exemplar sequence	Hs.5298	51094	NP_001121159 /// NP_057083	NM_001127687 /// NM_015999
201346_PM_at	201346_at	ADIPOR2	adiponectin receptor 2	Exemplar sequence	Hs.371642	79602	NP_078827	NM_024551
204119_PM_s_at	204119_s_at	ADK	adenosine kinase	Exemplar sequence	Hs.656586	132	NP_001114 /// NP_006712	NM_001123 /// NM_006721
204120_PM_s_at	204120_s_at	ADK	adenosine kinase	Exemplar sequence	Hs.656586	132	NP_001114 /// NP_006712	NM_001123 /// NM_006721
202912_PM_at	202912_at	ADM	adrenomedullin	Exemplar sequence	Hs.441047	133	NP_001115	NM_001124
220538_PM_at	220538_at	ADM2	adrenomedullin 2	Exemplar sequence	Hs.449099	79924	NP_079142	NM_024866
226426_PM_at	226426_at	ADNP	activity-dependent neuroprotector homeobox	Consensus sequence	Hs.570355	23394	NP_056154 /// NP_852107	NM_015339 /// NM_181442
201773_PM_at	201773_at	ADNP	activity-dependent neuroprotector homeobox	Exemplar sequence	Hs.570355	23394	NP_056154 /// NP_852107	NM_015339 /// NM_181442
203322_PM_at	203322_at	ADNP2	ADNP homeobox 2	Consensus sequence	Hs.131915	22850	NP_055728	NM_014913
203321_PM_s_at	203321_s_at	ADNP2	ADNP homeobox 2	Consensus sequence	Hs.131915	22850	NP_055728	NM_014913
212502_PM_at	212502_at	ADO	2-aminoethanethiol (cysteamine) dioxygenase	Consensus sequence	Hs.99821	84890	NP_116193	NM_032804
212500_PM_at	212500_at	ADO	2-aminoethanethiol (cysteamine) dioxygenase	Consensus sequence	Hs.99821	84890	NP_116193	NM_032804
216220_PM_s_at	216220_s_at	ADORA1	adenosine A1 receptor	Consensus sequence	Hs.77867	134	NP_000665 /// NP_001041695	NM_000674 /// NM_001048230
205481_PM_at	205481_at	ADORA1	adenosine A1 receptor	Exemplar sequence	Hs.77867	134	NP_000665 /// NP_001041695	NM_000674 /// NM_001048230
205013_PM_s_at	205013_s_at	ADORA2A /// CYTSA	adenosine A2a receptor /// cytospin A	Exemplar sequence	Hs.474384	135 /// 23384	NP_000666 /// NP_001138940 /// NP_056145	NM_000675 /// NM_001145468 /// NM_015330
205891_PM_at	205891_at	ADORA2B	adenosine A2b receptor	Exemplar sequence	Hs.167046	136	NP_000667	NM_000676
206171_PM_at	206171_at	ADORA3	adenosine A3 receptor	Exemplar sequence	Hs.281342	140	NP_000668 /// NP_001075445 /// NP_065734	NM_000677 /// NM_001081976 /// NM_020683
223660_PM_at	223660_at	ADORA3	adenosine A3 receptor	Exemplar sequence	Hs.281342	140	NP_000668 /// NP_001075445 /// NP_065734	NM_000677 /// NM_001081976 /// NM_020683
224455_PM_s_at	224455_s_at	ADPGK	ADP-dependent glucokinase	Exemplar sequence	Hs.654636	83440	NP_112574	NM_031284 /// NR_023318 /// NR_023319
220980_PM_s_at	220980_s_at	ADPGK	ADP-dependent glucokinase	Exemplar sequence	Hs.654636	83440	NP_112574	NM_031284 /// NR_023318 /// NR_023319
207863_PM_at	207863_at	ADPRH	ADP-ribosylarginine hydrolase	Exemplar sequence	Hs.99884	141	NP_001116	NM_001125
228042_PM_at	228042_at	ADPRH	ADP-ribosylarginine hydrolase	Consensus sequence	Hs.99884	141	NP_001116	NM_001125
238505_PM_at	238505_at	ADPRH	ADP-ribosylarginine hydrolase	Consensus sequence	Hs.99884	141	NP_001116	NM_001125
1553163_PM_at	1553163_at	ADPRHL1	ADP-ribosylhydrolase like 1	Consensus sequence	Hs.98669	113622	NP_612439 /// NP_954631	NM_138430 /// NM_199162
238054_PM_at	238054_at	ADPRHL1	ADP-ribosylhydrolase like 1	Consensus sequence	Hs.98669	113622	NP_612439 /// NP_954631	NM_138430 /// NM_199162
223097_PM_at	223097_at	ADPRHL2	ADP-ribosylhydrolase like 2	Exemplar sequence	Hs.18021	54936	NP_060295	NM_017825
211489_PM_at	211489_at	ADRA1A	adrenergic, alpha-1A-, receptor	Exemplar sequence	Hs.709175	148	NP_000671 /// NP_150645 /// NP_150646 /// NP_150647	NM_000680 /// NM_033302 /// NM_033303 /// NM_033304
211490_PM_at	211490_at	ADRA1A	adrenergic, alpha-1A-, receptor	Exemplar sequence	Hs.709175	148	NP_000671 /// NP_150645 /// NP_150646 /// NP_150647	NM_000680 /// NM_033302 /// NM_033303 /// NM_033304
211491_PM_at	211491_at	ADRA1A	adrenergic, alpha-1A-, receptor	Exemplar sequence	Hs.709175	148	NP_000671 /// NP_150645 /// NP_150646 /// NP_150647	NM_000680 /// NM_033302 /// NM_033303 /// NM_033304
211492_PM_s_at	211492_s_at	ADRA1A	adrenergic, alpha-1A-, receptor	Exemplar sequence	Hs.709175	148	NP_000671 /// NP_150645 /// NP_150646 /// NP_150647	NM_000680 /// NM_033302 /// NM_033303 /// NM_033304
207589_PM_at	207589_at	ADRA1B	adrenergic, alpha-1B-, receptor	Exemplar sequence	Hs.368632	147	NP_000670	NM_000679
210960_PM_at	210960_at	ADRA1D	adrenergic, alpha-1D-, receptor	Exemplar sequence	Hs.557	146	NP_000669	NM_000678
210961_PM_s_at	210961_s_at	ADRA1D	adrenergic, alpha-1D-, receptor	Exemplar sequence	Hs.557	146	NP_000669	NM_000678
209869_PM_at	209869_at	ADRA2A	adrenergic, alpha-2A-, receptor	Exemplar sequence	Hs.249159	150	NP_000672	NM_000681
208544_PM_at	208544_at	ADRA2B	adrenergic, alpha-2B-, receptor	Exemplar sequence	Hs.247686	151	NP_000673	NM_000682
206128_PM_at	206128_at	ADRA2C	adrenergic, alpha-2C-, receptor	Consensus sequence	Hs.123022	152	NP_000674	NM_000683
229309_PM_at	229309_at	ADRB1	adrenergic, beta-1-, receptor	Consensus sequence	Hs.99913	153	NP_000675	NM_000684
229277_PM_at	229277_at	ADRB1	adrenergic, beta-1-, receptor	Consensus sequence	Hs.99913	153	NP_000675	NM_000684
208214_PM_at	208214_at	ADRB1	adrenergic, beta-1-, receptor	Exemplar sequence	Hs.99913	153	NP_000675	NM_000684
206170_PM_at	206170_at	ADRB2	adrenergic, beta-2-, receptor, surface	Exemplar sequence	Hs.2551	154	NP_000015	NM_000024
206812_PM_at	206812_at	ADRB3	adrenergic, beta-3-, receptor	Exemplar sequence	Hs.2549	155	NP_000016	NM_000025
217303_PM_s_at	217303_s_at	ADRB3	adrenergic, beta-3-, receptor	Consensus sequence	Hs.2549	155	NP_000016	NM_000025
201401_PM_s_at	201401_s_at	ADRBK1	adrenergic, beta, receptor kinase 1	Exemplar sequence	Hs.83636	156	NP_001610	NM_001619
38447_PM_at	38447_at	ADRBK1	adrenergic, beta, receptor kinase 1	Consensus sequence	Hs.83636	156	NP_001610	NM_001619
201402_PM_at	201402_at	ADRBK1	adrenergic, beta, receptor kinase 1	Exemplar sequence	Hs.83636	156	NP_001610	NM_001619
204184_PM_s_at	204184_s_at	ADRBK2	adrenergic, beta, receptor kinase 2	Exemplar sequence	Hs.657494	157	NP_005151	NM_005160
228771_PM_at	228771_at	ADRBK2	adrenergic, beta, receptor kinase 2	Consensus sequence	Hs.657494	157	NP_005151	NM_005160
204183_PM_s_at	204183_s_at	ADRBK2	adrenergic, beta, receptor kinase 2	Consensus sequence	Hs.657494	157	NP_005151	NM_005160
201281_PM_at	201281_at	ADRM1	adhesion regulating molecule 1	Exemplar sequence	Hs.90107	11047	NP_008933 /// NP_783163	NM_007002 /// NM_175573
202144_PM_s_at	202144_s_at	ADSL	adenylosuccinate lyase	Exemplar sequence	Hs.75527	158	NP_000017 /// NP_001116850	NM_000026 /// NM_001123378
210250_PM_x_at	210250_x_at	ADSL	adenylosuccinate lyase	Exemplar sequence	Hs.75527	158	NP_000017 /// NP_001116850	NM_000026 /// NM_001123378
227310_PM_at	227310_at	ADSS	Adenylosuccinate synthase	Consensus sequence	Hs.498313	159	NP_001117	NM_001126
221761_PM_at	221761_at	ADSS	adenylosuccinate synthase	Consensus sequence	Hs.498313	159	NP_001117	NM_001126
238259_PM_at	238259_at	ADSSL1	Adenylosuccinate synthase like 1	Consensus sequence	Hs.592327	122622	NP_689541 /// NP_954634	NM_152328 /// NM_199165
226325_PM_at	226325_at	ADSSL1	adenylosuccinate synthase like 1	Consensus sequence	Hs.592327	122622	NP_689541 /// NP_954634	NM_152328 /// NM_199165
201792_PM_at	201792_at	AEBP1	AE binding protein 1	Exemplar sequence	Hs.439463	165	NP_001120	NM_001129
225889_PM_at	225889_at	AEBP2	AE binding protein 2	Consensus sequence	Hs.126497	121536	NP_001107648 /// NP_694939	NM_001114176 /// NM_153207
235184_PM_at	235184_at	AEBP2	AE binding protein 2	Consensus sequence	Hs.126497	121536	NP_001107648 /// NP_694939	NM_001114176 /// NM_153207
219361_PM_s_at	219361_s_at	AEN	apoptosis enhancing nuclease	Exemplar sequence	Hs.436102	64782	NP_073604	NM_022767
217729_PM_s_at	217729_s_at	AES	amino-terminal enhancer of split	Exemplar sequence	Hs.515053	166	NP_001121 /// NP_945320 /// NP_945321	NM_001130 /// NM_198969 /// NM_198970
203563_PM_at	203563_at	AFAP1	actin filament associated protein 1	Exemplar sequence	Hs.529369	60312	NP_001128119 /// NP_940997	NM_001134647 /// NM_198595
1555542_PM_at	1555542_at	AFAP1L1	actin filament associated protein 1-like 1	Consensus sequence	Hs.483793	134265	NP_001139809 /// NP_689619	NM_001146337 /// NM_152406
226955_PM_at	226955_at	AFAP1L1	actin filament associated protein 1-like 1	Consensus sequence	Hs.483793	134265	NP_001139809 /// NP_689619	NM_001146337 /// NM_152406
226829_PM_at	226829_at	AFAP1L2	actin filament associated protein 1-like 2	Consensus sequence	Hs.501106	84632	NP_001001936 /// NP_115939	NM_001001936 /// NM_032550
201924_PM_at	201924_at	AFF1	AF4/FMR2 family, member 1	Exemplar sequence	Hs.480190	4299	NP_001160165 /// NP_005926	NM_001166693 /// NM_005935
215451_PM_s_at	215451_s_at	AFF1	AF4/FMR2 family, member 1	Consensus sequence	Hs.480190	4299	NP_001160165 /// NP_005926	NM_001166693 /// NM_005935
211826_PM_s_at	211826_s_at	AFF1	AF4/FMR2 family, member 1	Exemplar sequence	Hs.480190	4299	NP_001160165 /// NP_005926	NM_001166693 /// NM_005935
210957_PM_s_at	210957_s_at	AFF2	AF4/FMR2 family, member 2	Exemplar sequence	Hs.496911	2334	NP_001162593 /// NP_001162594 /// NP_001162595 /// NP_001162596 /// NP_001164099 /// NP_002016	NM_001169122 /// NM_001169123 /// NM_001169124 /// NM_001169125 /// NM_001170628 /// NM_002025
216364_PM_s_at	216364_s_at	AFF2	AF4/FMR2 family, member 2	Consensus sequence	Hs.496911	2334	NP_001162593 /// NP_001162594 /// NP_001162595 /// NP_001162596 /// NP_001164099 /// NP_002016	NM_001169122 /// NM_001169123 /// NM_001169124 /// NM_001169125 /// NM_001170628 /// NM_002025
206105_PM_at	206105_at	AFF2	AF4/FMR2 family, member 2	Exemplar sequence	Hs.496911	2334	NP_001162593 /// NP_001162594 /// NP_001162595 /// NP_001162596 /// NP_001164099 /// NP_002016	NM_001169122 /// NM_001169123 /// NM_001169124 /// NM_001169125 /// NM_001170628 /// NM_002025
205734_PM_s_at	205734_s_at	AFF3	AF4/FMR2 family, member 3	Consensus sequence	Hs.444414	3899	NP_001020279 /// NP_002276	NM_001025108 /// NM_002285
205735_PM_s_at	205735_s_at	AFF3	AF4/FMR2 family, member 3	Exemplar sequence	Hs.444414	3899	NP_001020279 /// NP_002276	NM_001025108 /// NM_002285
243967_PM_at	243967_at	AFF3	AF4/FMR2 family, member 3	Consensus sequence	Hs.444414	3899	NP_001020279 /// NP_002276	NM_001025108 /// NM_002285
227198_PM_at	227198_at	AFF3	AF4/FMR2 family, member 3	Consensus sequence	Hs.444414	3899	NP_001020279 /// NP_002276	NM_001025108 /// NM_002285
1565034_PM_s_at	1565034_s_at	AFF3 /// MLL	AF4/FMR2 family, member 3 /// myeloid/lymphoid or mixed-lineage leukemia (trithorax homolog, Drosophila)	Consensus sequence	Hs.258855	3899 /// 4297	NP_001020279 /// NP_002276 /// NP_005924	NM_001025108 /// NM_002285 /// NM_005933
225229_PM_at	225229_at	AFF4	AF4/FMR2 family, member 4	Consensus sequence	Hs.519313	27125	NP_055238	NM_014423
219199_PM_at	219199_at	AFF4	AF4/FMR2 family, member 4	Exemplar sequence	Hs.519313	27125	NP_055238	NM_014423
232865_PM_at	232865_at	AFF4	AF4/FMR2 family, member 4	Consensus sequence	Hs.519313	27125	NP_055238	NM_014423
232864_PM_s_at	232864_s_at	AFF4	AF4/FMR2 family, member 4	Consensus sequence	Hs.519313	27125	NP_055238	NM_014423
239439_PM_at	239439_at	AFF4	AF4/FMR2 family, member 4	Consensus sequence	Hs.519313	27125	NP_055238	NM_014423
243487_PM_at	243487_at	AFF4	AF4/FMR2 family, member 4	Consensus sequence	Hs.519313	27125	NP_055238	NM_014423
1555435_PM_at	1555435_at	AFF4	AF4/FMR2 family, member 4	Consensus sequence	Hs.519313	27125	NP_055238	NM_014423
1555436_PM_a_at	1555436_a_at	AFF4	AF4/FMR2 family, member 4	Consensus sequence	Hs.519313	27125	NP_055238	NM_014423
1559863_PM_a_at	1559863_a_at	AFG3L1	AFG3 ATPase family gene 3-like 1 (S. cerevisiae)	Consensus sequence	Hs.534773	172	---	NR_003226 /// NR_003227 /// NR_003228
236250_PM_at	236250_at	AFG3L1	AFG3 ATPase family gene 3-like 1 (S. cerevisiae)	Consensus sequence	Hs.534773	172	---	NR_003226 /// NR_003227 /// NR_003228
1552287_PM_s_at	1552287_s_at	AFG3L1	AFG3 ATPase family gene 3-like 1 (S. cerevisiae)	Consensus sequence	Hs.534773	172	---	NR_003226 /// NR_003227 /// NR_003228
1557820_PM_at	1557820_at	AFG3L2	AFG3 ATPase family gene 3-like 2 (yeast)	Consensus sequence	Hs.528996	10939	NP_006787	NM_006796
202486_PM_at	202486_at	AFG3L2	AFG3 ATPase family gene 3-like 2 (yeast)	Exemplar sequence	Hs.528996	10939	NP_006787	NM_006796
206840_PM_at	206840_at	AFM	afamin	Exemplar sequence	Hs.168718	173	NP_001124	NM_001133
240318_PM_at	240318_at	AFMID	arylformamidase	Consensus sequence	Hs.558614	125061	NP_001010982 /// NP_001138998	NM_001010982 /// NM_001145526 /// NR_027083
212221_PM_x_at	212221_x_at	AFMID /// IDS	arylformamidase /// iduronate 2-sulfatase	Consensus sequence	Hs.460960	125061 /// 3423	NP_000193 /// NP_001010982 /// NP_001138998 /// NP_001160022 /// NP_006114	NM_000202 /// NM_001010982 /// NM_001145526 /// NM_001166550 /// NM_006123 /// NR_027083
204694_PM_at	204694_at	AFP	alpha-fetoprotein	Exemplar sequence	Hs.518808	174	NP_001125	NM_001134
222472_PM_at	222472_at	AFTPH	aftiphilin	Consensus sequence	Hs.655167	54812	NP_001002243 /// NP_060127 /// NP_982261	NM_001002243 /// NM_017657 /// NM_203437
217939_PM_s_at	217939_s_at	AFTPH	aftiphilin	Exemplar sequence	Hs.655167	54812	NP_001002243 /// NP_060127 /// NP_982261	NM_001002243 /// NM_017657 /// NM_203437
227099_PM_s_at	227099_s_at	AG2	protein Ag2 homolog	Consensus sequence	Hs.714890	387763	NP_001138505	NM_001145033
204332_PM_s_at	204332_s_at	AGA	aspartylglucosaminidase	Consensus sequence	Hs.207776	175	NP_000018 /// NP_001165459	NM_000027 /// NM_001171988 /// NR_033655
204333_PM_s_at	204333_s_at	AGA	aspartylglucosaminidase	Exemplar sequence	Hs.207776	175	NP_000018 /// NP_001165459	NM_000027 /// NM_001171988 /// NR_033655
216064_PM_s_at	216064_s_at	AGA	aspartylglucosaminidase	Consensus sequence	Hs.207776	175	NP_000018 /// NP_001165459	NM_000027 /// NM_001171988 /// NR_033655
204066_PM_s_at	204066_s_at	AGAP1	ArfGAP with GTPase domain, ankyrin repeat and PH domain 1	Exemplar sequence	Hs.435039	116987	NP_001032208 /// NP_055729	NM_001037131 /// NM_014914
235968_PM_at	235968_at	AGAP1	ArfGAP with GTPase domain, ankyrin repeat and PH domain 1	Consensus sequence	Hs.435039	116987	NP_001032208 /// NP_055729	NM_001037131 /// NM_014914
242393_PM_x_at	242393_x_at	AGAP10 /// AGAP4 /// AGAP9 /// BMS1P1 /// BMS1P5 /// LOC100133130 /// LOC399753	ArfGAP with GTPase domain, ankyrin repeat and PH domain 10 /// ArfGAP with GTPase domain, ankyrin repeat and PH domain 4 /// ArfGAP with GTPase domain, ankyrin repeat and PH domain 9 /// BMS1 pseudogene 1 /// BMS1 pseudogene 5 /// PRO1102 /// hypothetical LOC399753	Consensus sequence	Hs.499496	100133130 /// 119016 /// 399753 /// 399761 /// 642517 /// 728053 /// 728127	NP_597703 /// XP_001714838 /// XP_001716862 /// XP_001724537 /// XP_378223 /// XP_935686 /// XP_935704 /// XP_935715 /// XP_935727 /// XP_935740 /// XP_935758 /// XP_935772 /// XP_935784 /// XP_935797 /// XP_935810 /// XP_935822 /// XP_935834 /// XP_935845	NM_133446 /// NR_003611 /// NR_026566 /// NR_029396 /// XM_001714786 /// XM_001716810 /// XM_001724485 /// XM_378223 /// XM_930593 /// XM_930611 /// XM_930622 /// XM_930634 /// XM_930647 /// XM_930665 /// XM_930679 /// XM_930691 /// XM_930704 /// XM_930717 /// XM_930729 /// XM_930741 /// XM_930752
238553_PM_at	238553_at	AGAP10 /// AGAP4 /// AGAP9 /// BMS1P1 /// BMS1P5 /// LOC399753	ArfGAP with GTPase domain, ankyrin repeat and PH domain 10 /// ArfGAP with GTPase domain, ankyrin repeat and PH domain 4 /// ArfGAP with GTPase domain, ankyrin repeat and PH domain 9 /// BMS1 pseudogene 1 /// BMS1 pseudogene 5 /// hypothetical LOC399753	Consensus sequence	Hs.652450	119016 /// 399753 /// 399761 /// 642517 /// 728053 /// 728127	NP_597703 /// XP_001714838 /// XP_001716862 /// XP_378223 /// XP_935686 /// XP_935704 /// XP_935715 /// XP_935727 /// XP_935740 /// XP_935758 /// XP_935772 /// XP_935784 /// XP_935797 /// XP_935810 /// XP_935822 /// XP_935834 /// XP_935845	NM_133446 /// NR_003611 /// NR_026566 /// NR_029396 /// XM_001714786 /// XM_001716810 /// XM_378223 /// XM_930593 /// XM_930611 /// XM_930622 /// XM_930634 /// XM_930647 /// XM_930665 /// XM_930679 /// XM_930691 /// XM_930704 /// XM_930717 /// XM_930729 /// XM_930741 /// XM_930752
243937_PM_x_at	243937_x_at	AGAP10 /// AGAP4 /// AGAP9 /// BMS1P1 /// BMS1P5 /// LOC399753	ArfGAP with GTPase domain, ankyrin repeat and PH domain 10 /// ArfGAP with GTPase domain, ankyrin repeat and PH domain 4 /// ArfGAP with GTPase domain, ankyrin repeat and PH domain 9 /// BMS1 pseudogene 1 /// BMS1 pseudogene 5 /// hypothetical LOC399753	Consensus sequence	Hs.652450	119016 /// 399753 /// 399761 /// 642517 /// 728053 /// 728127	NP_597703 /// XP_001714838 /// XP_001716862 /// XP_378223 /// XP_935686 /// XP_935704 /// XP_935715 /// XP_935727 /// XP_935740 /// XP_935758 /// XP_935772 /// XP_935784 /// XP_935797 /// XP_935810 /// XP_935822 /// XP_935834 /// XP_935845	NM_133446 /// NR_003611 /// NR_026566 /// NR_029396 /// XM_001714786 /// XM_001716810 /// XM_378223 /// XM_930593 /// XM_930611 /// XM_930622 /// XM_930634 /// XM_930647 /// XM_930665 /// XM_930679 /// XM_930691 /// XM_930704 /// XM_930717 /// XM_930729 /// XM_930741 /// XM_930752
1557382_PM_x_at	1557382_x_at	AGAP11	ankyrin repeat and GTPase domain Arf GTPase activating protein 11	Consensus sequence	Hs.511787	119385	NP_597704	NM_133447
1557380_PM_at	1557380_at	AGAP11	ankyrin repeat and GTPase domain Arf GTPase activating protein 11	Consensus sequence	Hs.511787	119385	NP_597704	NM_133447
229917_PM_at	229917_at	AGAP2	ArfGAP with GTPase domain, ankyrin repeat and PH domain 2	Consensus sequence	Hs.302435	116986	NP_001116244 /// NP_055585	NM_001122772 /// NM_014770
215080_PM_s_at	215080_s_at	AGAP2	ArfGAP with GTPase domain, ankyrin repeat and PH domain 2	Consensus sequence	Hs.302435	116986	NP_001116244 /// NP_055585	NM_001122772 /// NM_014770
206152_PM_at	206152_at	AGAP2	ArfGAP with GTPase domain, ankyrin repeat and PH domain 2	Exemplar sequence	Hs.302435	116986	NP_001116244 /// NP_055585	NM_001122772 /// NM_014770
231299_PM_at	231299_at	AGAP3	ArfGAP with GTPase domain, ankyrin repeat and PH domain 3	Consensus sequence	Hs.647075	116988	NP_001036000 /// NP_114152	NM_001042535 /// NM_031946
225789_PM_at	225789_at	AGAP3	ArfGAP with GTPase domain, ankyrin repeat and PH domain 3	Consensus sequence	Hs.647075	116988	NP_001036000 /// NP_114152	NM_001042535 /// NM_031946
239026_PM_x_at	239026_x_at	AGAP3	ArfGAP with GTPase domain, ankyrin repeat and PH domain 3	Consensus sequence	Hs.647075	116988	NP_001036000 /// NP_114152	NM_001042535 /// NM_031946
1565620_PM_at	1565620_at	AGAP4	ArfGAP with GTPase domain, ankyrin repeat and PH domain 4	Consensus sequence	Hs.656384	119016	NP_597703	NM_133446
221850_PM_x_at	221850_x_at	AGAP4 /// AGAP6 /// AGAP7 /// AGAP8	ArfGAP with GTPase domain, ankyrin repeat and PH domain 4 /// ArfGAP with GTPase domain, ankyrin repeat and PH domain 6 /// ArfGAP with GTPase domain, ankyrin repeat and PH domain 7 /// ArfGAP with GTPase domain, ankyrin repeat and PH domain 8	Consensus sequence	Hs.536192	119016 /// 414189 /// 653268 /// 728404	NP_001071133 /// NP_001071153 /// NP_001071154 /// NP_597703	NM_001077665 /// NM_001077685 /// NM_001077686 /// NM_133446
221971_PM_x_at	221971_x_at	AGAP5	ArfGAP with GTPase domain, ankyrin repeat and PH domain 5	Consensus sequence	Hs.651147	729092	NP_001137472	NM_001144000
1553447_PM_at	1553447_at	AGBL1	ATP/GTP binding protein-like 1	Consensus sequence	Hs.679833	123624	NP_689549	NM_152336
220390_PM_at	220390_at	AGBL2	ATP/GTP binding protein-like 2	Exemplar sequence	Hs.147377	79841	NP_079059	NM_024783
232395_PM_x_at	232395_x_at	AGBL3	ATP/GTP binding protein-like 3	Consensus sequence	Hs.648616	340351	NP_848658	NM_178563
1554820_PM_at	1554820_at	AGBL3	ATP/GTP binding protein-like 3	Consensus sequence	Hs.648616	340351	NP_848658	NM_178563
220649_PM_at	220649_at	AGBL3	ATP/GTP binding protein-like 3	Exemplar sequence	Hs.648616	340351	NP_848658	NM_178563
1553412_PM_at	1553412_at	AGBL4	ATP/GTP binding protein-like 4	Consensus sequence	Hs.551844	84871	NP_116174	NM_032785
1569570_PM_at	1569570_at	AGBL4	ATP/GTP binding protein-like 4	Consensus sequence	Hs.679809	84871	NP_116174	NM_032785
231857_PM_s_at	231857_s_at	AGBL5	ATP/GTP binding protein-like 5	Consensus sequence	Hs.138207	60509	NP_001030584 /// NP_068603	NM_001035507 /// NM_021831
218480_PM_at	218480_at	AGBL5	ATP/GTP binding protein-like 5	Exemplar sequence	Hs.138207	60509	NP_001030584 /// NP_068603	NM_001035507 /// NM_021831
238889_PM_at	238889_at	AGBL5	ATP/GTP binding protein-like 5	Consensus sequence	Hs.138207	60509	NP_001030584 /// NP_068603	NM_001035507 /// NM_021831
217046_PM_s_at	217046_s_at	AGER	advanced glycosylation end product-specific receptor	Consensus sequence	Hs.534342	177	NP_001127 /// NP_751947	NM_001136 /// NM_172197
210081_PM_at	210081_at	AGER	advanced glycosylation end product-specific receptor	Exemplar sequence	Hs.534342	177	NP_001127 /// NP_751947	NM_001136 /// NM_172197
218091_PM_at	218091_at	AGFG1	ArfGAP with FG repeats 1	Consensus sequence	Hs.352962	3267	NP_001128659 /// NP_001128660 /// NP_001128661 /// NP_004495	NM_001135187 /// NM_001135188 /// NM_001135189 /// NM_004504
218092_PM_s_at	218092_s_at	AGFG1	ArfGAP with FG repeats 1	Exemplar sequence	Hs.352962	3267	NP_001128659 /// NP_001128660 /// NP_001128661 /// NP_004495	NM_001135187 /// NM_001135188 /// NM_001135189 /// NM_004504
213928_PM_s_at	213928_s_at	AGFG1	ArfGAP with FG repeats 1	Consensus sequence	Hs.352962	3267	NP_001128659 /// NP_001128660 /// NP_001128661 /// NP_004495	NM_001135187 /// NM_001135188 /// NM_001135189 /// NM_004504
226561_PM_at	226561_at	AGFG1	ArfGAP with FG repeats 1	Consensus sequence	Hs.352962	3267	NP_001128659 /// NP_001128660 /// NP_001128661 /// NP_004495	NM_001135187 /// NM_001135188 /// NM_001135189 /// NM_004504
213926_PM_s_at	213926_s_at	AGFG1	ArfGAP with FG repeats 1	Consensus sequence	Hs.352962	3267	NP_001128659 /// NP_001128660 /// NP_001128661 /// NP_004495	NM_001135187 /// NM_001135188 /// NM_001135189 /// NM_004504
206821_PM_x_at	206821_x_at	AGFG2	ArfGAP with FG repeats 2	Exemplar sequence	Hs.521083	3268	NP_006067	NM_006076
222126_PM_at	222126_at	AGFG2	ArfGAP with FG repeats 2	Consensus sequence	Hs.521083	3268	NP_006067	NM_006076
222362_PM_at	222362_at	AGFG2	ArfGAP with FG repeats 2	Consensus sequence	Hs.521083	3268	NP_006067	NM_006076
217450_PM_at	217450_at	AGFG2	ArfGAP with FG repeats 2	Consensus sequence	Hs.521083	3268	NP_006067	NM_006076
1554618_PM_at	1554618_at	AGFG2	ArfGAP with FG repeats 2	Consensus sequence	Hs.521083	3268	NP_006067	NM_006076
206820_PM_at	206820_at	AGFG2	ArfGAP with FG repeats 2	Consensus sequence	Hs.521083	3268	NP_006067	NM_006076
218534_PM_s_at	218534_s_at	AGGF1	angiogenic factor with G patch and FHA domains 1	Exemplar sequence	Hs.634849	55109	NP_060516	NM_018046
222661_PM_at	222661_at	AGGF1	angiogenic factor with G patch and FHA domains 1	Consensus sequence	Hs.634849	55109	NP_060516	NM_018046
208042_PM_at	208042_at	AGGF1	angiogenic factor with G patch and FHA domains 1	Exemplar sequence	Hs.634849	55109	NP_060516	NM_018046
210710_PM_at	210710_at	AGGF1	angiogenic factor with G patch and FHA domains 1	Exemplar sequence	Hs.634849	55109	NP_060516	NM_018046
222132_PM_s_at	222132_s_at	AGK	acylglycerol kinase	Consensus sequence	Hs.724527	55750	NP_060708	NM_018238
218568_PM_at	218568_at	AGK	acylglycerol kinase	Exemplar sequence	Hs.724527	55750	NP_060708	NM_018238
1555610_PM_at	1555610_at	AGK	acylglycerol kinase	Consensus sequence	Hs.724527	55750	NP_060708	NM_018238
203566_PM_s_at	203566_s_at	AGL	amylo-alpha-1, 6-glucosidase, 4-alpha-glucanotransferase	Exemplar sequence	Hs.904	178	NP_000019 /// NP_000633 /// NP_000634 /// NP_000635 /// NP_000636 /// NP_000637	NM_000028 /// NM_000642 /// NM_000643 /// NM_000644 /// NM_000645 /// NM_000646
222930_PM_s_at	222930_s_at	AGMAT	agmatine ureohydrolase (agmatinase)	Exemplar sequence	Hs.567583	79814	NP_079034	NM_024758
219792_PM_at	219792_at	AGMAT	agmatine ureohydrolase (agmatinase)	Exemplar sequence	Hs.567583	79814	NP_079034	NM_024758
215535_PM_s_at	215535_s_at	AGPAT1	1-acylglycerol-3-phosphate O-acyltransferase 1 (lysophosphatidic acid acyltransferase, alpha)	Consensus sequence	Hs.409230	10554	NP_006402 /// NP_116130	NM_006411 /// NM_032741
32836_PM_at	32836_at	AGPAT1	1-acylglycerol-3-phosphate O-acyltransferase 1 (lysophosphatidic acid acyltransferase, alpha)	Consensus sequence	Hs.409230	10554	NP_006402 /// NP_116130	NM_006411 /// NM_032741
210678_PM_s_at	210678_s_at	AGPAT2	1-acylglycerol-3-phosphate O-acyltransferase 2 (lysophosphatidic acid acyltransferase, beta)	Exemplar sequence	Hs.320151	10555	NP_001012745 /// NP_006403	NM_001012727 /// NM_006412
32837_PM_at	32837_at	AGPAT2	1-acylglycerol-3-phosphate O-acyltransferase 2 (lysophosphatidic acid acyltransferase, beta)	Consensus sequence	Hs.320151	10555	NP_001012745 /// NP_006403	NM_001012727 /// NM_006412
223183_PM_at	223183_at	AGPAT3	1-acylglycerol-3-phosphate O-acyltransferase 3	Consensus sequence	Hs.248785	56894	NP_001032642 /// NP_064517	NM_001037553 /// NM_020132
223184_PM_s_at	223184_s_at	AGPAT3	1-acylglycerol-3-phosphate O-acyltransferase 3	Exemplar sequence	Hs.248785	56894	NP_001032642 /// NP_064517	NM_001037553 /// NM_020132
225440_PM_at	225440_at	AGPAT3	1-acylglycerol-3-phosphate O-acyltransferase 3	Consensus sequence	Hs.248785	56894	NP_001032642 /// NP_064517	NM_001037553 /// NM_020132
224282_PM_s_at	224282_s_at	AGPAT3	1-acylglycerol-3-phosphate O-acyltransferase 3	Exemplar sequence	Hs.248785	56894	NP_001032642 /// NP_064517	NM_001037553 /// NM_020132
219723_PM_x_at	219723_x_at	AGPAT3	1-acylglycerol-3-phosphate O-acyltransferase 3	Exemplar sequence	Hs.248785	56894	NP_001032642 /// NP_064517	NM_001037553 /// NM_020132
223182_PM_s_at	223182_s_at	AGPAT3	1-acylglycerol-3-phosphate O-acyltransferase 3	Consensus sequence	Hs.248785	56894	NP_001032642 /// NP_064517	NM_001037553 /// NM_020132
228667_PM_at	228667_at	AGPAT4	1-acylglycerol-3-phosphate O-acyltransferase 4 (lysophosphatidic acid acyltransferase, delta)	Consensus sequence	Hs.353175	56895	NP_064518	NM_020133
219693_PM_at	219693_at	AGPAT4	1-acylglycerol-3-phosphate O-acyltransferase 4 (lysophosphatidic acid acyltransferase, delta)	Exemplar sequence	Hs.353175	56895	NP_064518	NM_020133
218096_PM_at	218096_at	AGPAT5	1-acylglycerol-3-phosphate O-acyltransferase 5 (lysophosphatidic acid acyltransferase, epsilon)	Exemplar sequence	Hs.624002	55326	NP_060831	NM_018361
232007_PM_at	232007_at	AGPAT5	1-acylglycerol-3-phosphate O-acyltransferase 5 (lysophosphatidic acid acyltransferase, epsilon)	Consensus sequence	Hs.624002	55326	NP_060831	NM_018361
229577_PM_at	229577_at	AGPAT6	1-acylglycerol-3-phosphate O-acyltransferase 6 (lysophosphatidic acid acyltransferase, zeta)	Consensus sequence	Hs.355753	137964	NP_848934	NM_178819
224776_PM_at	224776_at	AGPAT6	1-acylglycerol-3-phosphate O-acyltransferase 6 (lysophosphatidic acid acyltransferase, zeta)	Consensus sequence	Hs.355753	137964	NP_848934	NM_178819
236743_PM_at	236743_at	AGPAT6	1-acylglycerol-3-phosphate O-acyltransferase 6 (lysophosphatidic acid acyltransferase, zeta)	Consensus sequence	Hs.355753	137964	NP_848934	NM_178819
224480_PM_s_at	224480_s_at	AGPAT9	1-acylglycerol-3-phosphate O-acyltransferase 9	Exemplar sequence	Hs.99196	84803	NP_116106	NM_032717
236150_PM_at	236150_at	AGPHD1	aminoglycoside phosphotransferase domain containing 1	Consensus sequence	Hs.307962	123688	NP_001013641 /// NP_001077081	NM_001013619 /// NM_001083612
225108_PM_at	225108_at	AGPS	alkylglycerone phosphate synthase	Consensus sequence	Hs.516543	8540	NP_003650	NM_003659
225113_PM_at	225113_at	AGPS	alkylglycerone phosphate synthase	Consensus sequence	Hs.516543	8540	NP_003650	NM_003659
225114_PM_at	225114_at	AGPS	alkylglycerone phosphate synthase	Consensus sequence	Hs.516543	8540	NP_003650	NM_003659
205401_PM_at	205401_at	AGPS	alkylglycerone phosphate synthase	Exemplar sequence	Hs.516543	8540	NP_003650	NM_003659
228969_PM_at	228969_at	AGR2	anterior gradient homolog 2 (Xenopus laevis)	Consensus sequence	Hs.530009	10551	NP_006399	NM_006408
209173_PM_at	209173_at	AGR2	anterior gradient homolog 2 (Xenopus laevis)	Exemplar sequence	Hs.530009	10551	NP_006399	NM_006408
228241_PM_at	228241_at	AGR3	anterior gradient homolog 3 (Xenopus laevis)	Consensus sequence	Hs.100686	155465	NP_789783	NM_176813
217419_PM_x_at	217419_x_at	AGRN	agrin	Consensus sequence	Hs.273330	375790	NP_940978	NM_198576
217410_PM_at	217410_at	AGRN	agrin	Consensus sequence	Hs.273330	375790	NP_940978	NM_198576
212283_PM_at	212283_at	AGRN	agrin	Consensus sequence	Hs.273330	375790	NP_940978	NM_198576
212285_PM_s_at	212285_s_at	AGRN	agrin	Consensus sequence	Hs.273330	375790	NP_940978	NM_198576
207193_PM_at	207193_at	AGRP	agouti related protein homolog (mouse)	Exemplar sequence	Hs.104633	181	NP_001129 /// NP_015531	NM_001138 /// NM_007316
202834_PM_at	202834_at	AGT	angiotensinogen (serpin peptidase inhibitor, clade A, member 8)	Exemplar sequence	Hs.19383	183	NP_000020	NM_000029
204500_PM_s_at	204500_s_at	AGTPBP1	ATP/GTP binding protein 1	Exemplar sequence	Hs.719980	23287	NP_056054	NM_015239
204499_PM_at	204499_at	AGTPBP1	ATP/GTP binding protein 1	Consensus sequence	Hs.719980	23287	NP_056054	NM_015239
208016_PM_s_at	208016_s_at	AGTR1	angiotensin II receptor, type 1	Exemplar sequence	Hs.477887	185	NP_000676 /// NP_004826 /// NP_033611 /// NP_114038 /// NP_114438	NM_000685 /// NM_004835 /// NM_009585 /// NM_031850 /// NM_032049
205357_PM_s_at	205357_s_at	AGTR1	angiotensin II receptor, type 1	Exemplar sequence	Hs.477887	185	NP_000676 /// NP_004826 /// NP_033611 /// NP_114038 /// NP_114438	NM_000685 /// NM_004835 /// NM_009585 /// NM_031850 /// NM_032049
207294_PM_at	207294_at	AGTR2	angiotensin II receptor, type 2	Exemplar sequence	Hs.405348	186	NP_000677	NM_000686
207293_PM_s_at	207293_s_at	AGTR2	angiotensin II receptor, type 2	Exemplar sequence	Hs.405348	186	NP_000677	NM_000686
222321_PM_at	222321_at	AGTR2	angiotensin II receptor, type 2	Consensus sequence	Hs.405348	186	NP_000677	NM_000686
225059_PM_at	225059_at	AGTRAP	angiotensin II receptor-associated protein	Consensus sequence	Hs.464438	57085	NP_001035284 /// NP_001035285 /// NP_001035286 /// NP_001035287 /// NP_065083	NM_001040194 /// NM_001040195 /// NM_001040196 /// NM_001040197 /// NM_020350
1555736_PM_a_at	1555736_a_at	AGTRAP	angiotensin II receptor-associated protein	Consensus sequence	Hs.464438	57085	NP_001035284 /// NP_001035285 /// NP_001035286 /// NP_001035287 /// NP_065083	NM_001040194 /// NM_001040195 /// NM_001040196 /// NM_001040197 /// NM_020350
206957_PM_at	206957_at	AGXT	alanine-glyoxylate aminotransferase	Exemplar sequence	Hs.144567	189	NP_000021	NM_000030
210327_PM_s_at	210327_s_at	AGXT	alanine-glyoxylate aminotransferase	Exemplar sequence	Hs.144567	189	NP_000021	NM_000030
210326_PM_at	210326_at	AGXT	alanine-glyoxylate aminotransferase	Exemplar sequence	Hs.144567	189	NP_000021	NM_000030
229229_PM_at	229229_at	AGXT2	alanine--glyoxylate aminotransferase 2	Consensus sequence	Hs.34494	64902	NP_114106	NM_031900
221008_PM_s_at	221008_s_at	AGXT2L1	alanine-glyoxylate aminotransferase 2-like 1	Exemplar sequence	Hs.106576	64850	NP_001140062 /// NP_001140099 /// NP_112569	NM_001146590 /// NM_001146627 /// NM_031279 /// NR_027474 /// NR_027475
226783_PM_at	226783_at	AGXT2L2	alanine-glyoxylate aminotransferase 2-like 2	Consensus sequence	Hs.248746	85007	NP_699204	NM_153373
232488_PM_at	232488_at	AGXT2L2	alanine-glyoxylate aminotransferase 2-like 2	Consensus sequence	Hs.248746	85007	NP_699204	NM_153373
226519_PM_s_at	226519_s_at	AGXT2L2	alanine-glyoxylate aminotransferase 2-like 2	Consensus sequence	Hs.248746	85007	NP_699204	NM_153373
1560224_PM_at	1560224_at	AHCTF1	AT hook containing transcription factor 1	Consensus sequence	Hs.300887	25909	NP_056261	NM_015446
226115_PM_at	226115_at	AHCTF1	AT hook containing transcription factor 1	Consensus sequence	Hs.300887	25909	NP_056261	NM_015446
214766_PM_s_at	214766_s_at	AHCTF1	AT hook containing transcription factor 1	Consensus sequence	Hs.300887	25909	NP_056261	NM_015446
200903_PM_s_at	200903_s_at	AHCY	adenosylhomocysteinase	Exemplar sequence	Hs.388004	191	NP_000678 /// NP_001155238	NM_000687 /// NM_001161766
200850_PM_s_at	200850_s_at	AHCYL1	adenosylhomocysteinase-like 1	Exemplar sequence	Hs.724396	10768	NP_006612	NM_006621
207464_PM_at	207464_at	AHCYL1	adenosylhomocysteinase-like 1	Exemplar sequence	Hs.724396	10768	NP_006612	NM_006621
200849_PM_s_at	200849_s_at	AHCYL1	adenosylhomocysteinase-like 1	Consensus sequence	Hs.724396	10768	NP_006612	NM_006621
200848_PM_at	200848_at	AHCYL1	adenosylhomocysteinase-like 1	Consensus sequence	Hs.724396	10768	NP_006612	NM_006621
215672_PM_s_at	215672_s_at	AHCYL2	adenosylhomocysteinase-like 2	Consensus sequence	Hs.600789	23382	NP_001124192 /// NP_001124194 /// NP_001124195 /// NP_056143	NM_001130720 /// NM_001130722 /// NM_001130723 /// NM_015328
212814_PM_at	212814_at	AHCYL2	adenosylhomocysteinase-like 2	Consensus sequence	Hs.600789	23382	NP_001124192 /// NP_001124194 /// NP_001124195 /// NP_056143	NM_001130720 /// NM_001130722 /// NM_001130723 /// NM_015328
243793_PM_at	243793_at	AHDC1	AT hook, DNA binding motif, containing 1	Consensus sequence	Hs.469280	27245	NP_001025053	NM_001029882
205002_PM_at	205002_at	AHDC1	AT hook, DNA binding motif, containing 1	Exemplar sequence	Hs.469280	27245	NP_001025053	NM_001029882
229379_PM_at	229379_at	AHDC1	AT hook, DNA binding motif, containing 1	Consensus sequence	Hs.469280	27245	NP_001025053	NM_001029882
221569_PM_at	221569_at	AHI1	Abelson helper integration site 1	Exemplar sequence	Hs.386684	54806	NP_001128302 /// NP_001128303 /// NP_001128304 /// NP_060121	NM_001134830 /// NM_001134831 /// NM_001134832 /// NM_017651
232461_PM_at	232461_at	AHI1	Abelson helper integration site 1	Consensus sequence	Hs.386684	54806	NP_001128302 /// NP_001128303 /// NP_001128304 /// NP_060121	NM_001134830 /// NM_001134831 /// NM_001134832 /// NM_017651
244699_PM_at	244699_at	AHI1	Abelson helper integration site 1	Consensus sequence	Hs.386684	54806	NP_001128302 /// NP_001128303 /// NP_001128304 /// NP_060121	NM_001134830 /// NM_001134831 /// NM_001134832 /// NM_017651
220841_PM_s_at	220841_s_at	AHI1	Abelson helper integration site 1	Exemplar sequence	Hs.386684	54806	NP_001128302 /// NP_001128303 /// NP_001128304 /// NP_060121	NM_001134830 /// NM_001134831 /// NM_001134832 /// NM_017651
220842_PM_at	220842_at	AHI1	Abelson helper integration site 1	Exemplar sequence	Hs.386684	54806	NP_001128302 /// NP_001128303 /// NP_001128304 /// NP_060121	NM_001134830 /// NM_001134831 /// NM_001134832 /// NM_017651
220016_PM_at	220016_at	AHNAK	AHNAK nucleoprotein	Exemplar sequence	Hs.502756	79026	NP_001611 /// NP_076965	NM_001620 /// NM_024060
235281_PM_x_at	235281_x_at	AHNAK	AHNAK nucleoprotein	Consensus sequence	Hs.502756	79026	NP_001611 /// NP_076965	NM_001620 /// NM_024060
238855_PM_at	238855_at	AHNAK	AHNAK nucleoprotein	Consensus sequence	Hs.502756	79026	NP_001611 /// NP_076965	NM_001620 /// NM_024060
1563560_PM_at	1563560_at	AHNAK	AHNAK nucleoprotein	Consensus sequence	Hs.502756	79026	NP_001611 /// NP_076965	NM_001620 /// NM_024060
211986_PM_at	211986_at	AHNAK	AHNAK nucleoprotein	Consensus sequence	Hs.502756	79026	NP_001611 /// NP_076965	NM_001620 /// NM_024060
1558378_PM_a_at	1558378_a_at	AHNAK2	AHNAK nucleoprotein 2	Consensus sequence	Hs.441783	113146	NP_612429	NM_138420
212992_PM_at	212992_at	AHNAK2	AHNAK nucleoprotein 2	Consensus sequence	Hs.441783	113146	NP_612429	NM_138420
202820_PM_at	202820_at	AHR	aryl hydrocarbon receptor	Exemplar sequence	Hs.171189	196	NP_001612	NM_001621
229354_PM_at	229354_at	AHRR	aryl-hydrocarbon receptor repressor	Consensus sequence	---	57491	NP_065782	NM_020731
201491_PM_at	201491_at	AHSA1	AHA1, activator of heat shock 90kDa protein ATPase homolog 1 (yeast)	Exemplar sequence	Hs.204041	10598	NP_036243	NM_012111
230148_PM_at	230148_at	AHSA2	AHA1, activator of heat shock 90kDa protein ATPase homolog 2 (yeast)	Consensus sequence	Hs.655602	130872	NP_689605	NM_152392
226665_PM_at	226665_at	AHSA2	AHA1, activator of heat shock 90kDa protein ATPase homolog 2 (yeast)	Consensus sequence	Hs.655602	130872	NP_689605	NM_152392
226334_PM_s_at	226334_s_at	AHSA2	AHA1, activator of heat shock 90kDa protein ATPase homolog 2 (yeast)	Consensus sequence	Hs.655602	130872	NP_689605	NM_152392
204551_PM_s_at	204551_s_at	AHSG	alpha-2-HS-glycoprotein	Exemplar sequence	Hs.324746	197	NP_001613	NM_001622
210929_PM_s_at	210929_s_at	AHSG /// LOC100131613	alpha-2-HS-glycoprotein /// PRO1454	Exemplar sequence	Hs.324746	100131613 /// 197	NP_001613 /// XP_001723180 /// XP_001724389 /// XP_001726631	NM_001622 /// XM_001723128 /// XM_001724337 /// XM_001726579
219672_PM_at	219672_at	AHSP	alpha hemoglobin stabilizing protein	Exemplar sequence	Hs.274309	51327	NP_057717	NM_016633
224499_PM_s_at	224499_s_at	AICDA	activation-induced cytidine deaminase	Exemplar sequence	Hs.149342	57379	NP_065712	NM_020661
219841_PM_at	219841_at	AICDA	activation-induced cytidine deaminase	Exemplar sequence	Hs.149342	57379	NP_065712	NM_020661
226801_PM_s_at	226801_s_at	AIDA	axin interactor, dorsalization associated	Consensus sequence	Hs.156625	64853	NP_073742	NM_022831
220199_PM_s_at	220199_s_at	AIDA	axin interactor, dorsalization associated	Exemplar sequence	Hs.156625	64853	NP_073742	NM_022831
213095_PM_x_at	213095_x_at	AIF1	allograft inflammatory factor 1	Consensus sequence	Hs.76364	199	NP_001614 /// NP_004838 /// NP_116573	NM_001623 /// NM_004847 /// NM_032955
215051_PM_x_at	215051_x_at	AIF1	allograft inflammatory factor 1	Consensus sequence	Hs.76364	199	NP_001614 /// NP_004838 /// NP_116573	NM_001623 /// NM_004847 /// NM_032955
207823_PM_s_at	207823_s_at	AIF1	allograft inflammatory factor 1	Exemplar sequence	Hs.76364	199	NP_001614 /// NP_004838 /// NP_116573	NM_001623 /// NM_004847 /// NM_032955
209901_PM_x_at	209901_x_at	AIF1	allograft inflammatory factor 1	Exemplar sequence	Hs.76364	199	NP_001614 /// NP_004838 /// NP_116573	NM_001623 /// NM_004847 /// NM_032955
223075_PM_s_at	223075_s_at	AIF1L	allograft inflammatory factor 1-like	Exemplar sequence	Hs.4944	83543	NP_113614	NM_031426
223074_PM_s_at	223074_s_at	AIF1L	allograft inflammatory factor 1-like	Consensus sequence	Hs.4944	83543	NP_113614	NM_031426
205512_PM_s_at	205512_s_at	AIFM1	apoptosis-inducing factor, mitochondrion-associated, 1	Exemplar sequence	Hs.424932	9131	NP_001124318 /// NP_001124319 /// NP_004199 /// NP_665811 /// NP_665812	NM_001130846 /// NM_001130847 /// NM_004208 /// NM_145812 /// NM_145813
228445_PM_at	228445_at	AIFM2	apoptosis-inducing factor, mitochondrion-associated, 2	Consensus sequence	Hs.655377	84883	NP_116186	NM_032797
224461_PM_s_at	224461_s_at	AIFM2	apoptosis-inducing factor, mitochondrion-associated, 2	Exemplar sequence	Hs.655377	84883	NP_116186	NM_032797
244084_PM_at	244084_at	AIFM3	apoptosis-inducing factor, mitochondrion-associated, 3	Consensus sequence	Hs.723246	150209	NP_001018070 /// NP_001139760 /// NP_653305	NM_001018060 /// NM_001146288 /// NM_144704 /// NR_027464
232810_PM_at	232810_at	AIG1	androgen-induced 1	Consensus sequence	Hs.567501	51390	NP_057192	NM_016108
230520_PM_at	230520_at	AIG1	androgen-induced 1	Consensus sequence	Hs.567501	51390	NP_057192	NM_016108
223136_PM_at	223136_at	AIG1	androgen-induced 1	Exemplar sequence	Hs.567501	51390	NP_057192	NM_016108
212543_PM_at	212543_at	AIM1	absent in melanoma 1	Consensus sequence	Hs.643590	202	NP_001615	NM_001624
220290_PM_at	220290_at	AIM1L	absent in melanoma 1-like	Exemplar sequence	Hs.128738	55057	NP_001034864	NM_001039775
220289_PM_s_at	220289_s_at	AIM1L	absent in melanoma 1-like	Exemplar sequence	Hs.128738	55057	NP_001034864	NM_001039775
206513_PM_at	206513_at	AIM2	absent in melanoma 2	Exemplar sequence	Hs.281898	9447	NP_004824	NM_004833
227605_PM_at	227605_at	AIMP1	aminoacyl tRNA synthetase complex-interacting multifunctional protein 1	Consensus sequence	Hs.591680	9255	NP_001135887 /// NP_001135888 /// NP_004748	NM_001142415 /// NM_001142416 /// NM_004757
235594_PM_at	235594_at	AIMP1	Aminoacyl tRNA synthetase complex-interacting multifunctional protein 1	Consensus sequence	Hs.591680	9255	NP_001135887 /// NP_001135888 /// NP_004748	NM_001142415 /// NM_001142416 /// NM_004757
202541_PM_at	202541_at	AIMP1	aminoacyl tRNA synthetase complex-interacting multifunctional protein 1	Consensus sequence	Hs.591680	9255	NP_001135887 /// NP_001135888 /// NP_004748	NM_001142415 /// NM_001142416 /// NM_004757
202542_PM_s_at	202542_s_at	AIMP1	aminoacyl tRNA synthetase complex-interacting multifunctional protein 1	Exemplar sequence	Hs.591680	9255	NP_001135887 /// NP_001135888 /// NP_004748	NM_001142415 /// NM_001142416 /// NM_004757
209972_PM_s_at	209972_s_at	AIMP2	aminoacyl tRNA synthetase complex-interacting multifunctional protein 2	Exemplar sequence	Hs.301613	7965	NP_006294	NM_006303
209971_PM_x_at	209971_x_at	AIMP2	aminoacyl tRNA synthetase complex-interacting multifunctional protein 2	Consensus sequence	Hs.301613	7965	NP_006294	NM_006303
202138_PM_x_at	202138_x_at	AIMP2	aminoacyl tRNA synthetase complex-interacting multifunctional protein 2	Exemplar sequence	Hs.301613	7965	NP_006294	NM_006303
201781_PM_s_at	201781_s_at	AIP	aryl hydrocarbon receptor interacting protein	Consensus sequence	Hs.412433	9049	NP_003968	NM_003977
201782_PM_s_at	201782_s_at	AIP	aryl hydrocarbon receptor interacting protein	Exemplar sequence	Hs.412433	9049	NP_003968	NM_003977
219977_PM_at	219977_at	AIPL1	aryl hydrocarbon receptor interacting protein-like 1	Exemplar sequence	Hs.279887	23746	NP_001028226 /// NP_001028227 /// NP_055151	NM_001033054 /// NM_001033055 /// NM_014336
235731_PM_at	235731_at	AIPL1	aryl hydrocarbon receptor interacting protein-like 1	Consensus sequence	Hs.279887	23746	NP_001028226 /// NP_001028227 /// NP_055151	NM_001033054 /// NM_001033055 /// NM_014336
208090_PM_s_at	208090_s_at	AIRE	autoimmune regulator	Exemplar sequence	Hs.129829	326	NP_000374 /// NP_000649	NM_000383 /// NM_000658
215790_PM_at	215790_at	AJAP1	adherens junctions associated protein 1	Consensus sequence	Hs.25924	55966	NP_001035943 /// NP_061324	NM_001042478 /// NM_018836
215789_PM_s_at	215789_s_at	AJAP1	adherens junctions associated protein 1	Consensus sequence	Hs.25924	55966	NP_001035943 /// NP_061324	NM_001042478 /// NM_018836
206460_PM_at	206460_at	AJAP1	adherens junctions associated protein 1	Exemplar sequence	Hs.25924	55966	NP_001035943 /// NP_061324	NM_001042478 /// NM_018836
202588_PM_at	202588_at	AK1	adenylate kinase 1	Exemplar sequence	Hs.175473	203	NP_000467	NM_000476
202587_PM_s_at	202587_s_at	AK1	adenylate kinase 1	Exemplar sequence	Hs.175473	203	NP_000467	NM_000476
212172_PM_at	212172_at	AK2	adenylate kinase 2	Consensus sequence	Hs.470907	204	NP_001616 /// NP_037543	NM_001625 /// NM_013411
212174_PM_at	212174_at	AK2	adenylate kinase 2	Consensus sequence	Hs.470907	204	NP_001616 /// NP_037543	NM_001625 /// NM_013411
212175_PM_s_at	212175_s_at	AK2	adenylate kinase 2	Consensus sequence	Hs.470907	204	NP_001616 /// NP_037543	NM_001625 /// NM_013411
208967_PM_s_at	208967_s_at	AK2	adenylate kinase 2	Exemplar sequence	Hs.470907	204	NP_001616 /// NP_037543	NM_001625 /// NM_013411
212173_PM_at	212173_at	AK2	adenylate kinase 2	Consensus sequence	Hs.470907	204	NP_001616 /// NP_037543	NM_001625 /// NM_013411
205996_PM_s_at	205996_s_at	AK2	adenylate kinase 2	Exemplar sequence	Hs.470907	204	NP_001616 /// NP_037543	NM_001625 /// NM_013411
224151_PM_s_at	224151_s_at	AK3	adenylate kinase 3	Exemplar sequence	Hs.493362	50808	NP_057366	NM_016282
224655_PM_at	224655_at	AK3	adenylate kinase 3	Consensus sequence	Hs.493362	50808	NP_057366	NM_016282
225342_PM_at	225342_at	AK3L1	adenylate kinase 3-like 1	Consensus sequence	Hs.592601	205	NP_001005353 /// NP_037542 /// NP_982289	NM_001005353 /// NM_013410 /// NM_203464
230630_PM_at	230630_at	AK3L1	adenylate kinase 3-like 1	Consensus sequence	Hs.10862	205	NP_001005353 /// NP_037542 /// NP_982289	NM_001005353 /// NM_013410 /// NM_203464
204347_PM_at	204347_at	AK3L1	adenylate kinase 3-like 1	Consensus sequence	Hs.10862	205	NP_001005353 /// NP_037542 /// NP_982289	NM_001005353 /// NM_013410 /// NM_203464
204348_PM_s_at	204348_s_at	AK3L1	adenylate kinase 3-like 1	Exemplar sequence	Hs.10862	205	NP_001005353 /// NP_037542 /// NP_982289	NM_001005353 /// NM_013410 /// NM_203464
219308_PM_s_at	219308_s_at	AK5	adenylate kinase 5	Exemplar sequence	Hs.559718	26289	NP_036225 /// NP_777283	NM_012093 /// NM_174858
222862_PM_s_at	222862_s_at	AK5	adenylate kinase 5	Consensus sequence	Hs.559718	26289	NP_036225 /// NP_777283	NM_012093 /// NM_174858
1569699_PM_at	1569699_at	AK7	adenylate kinase 7	Consensus sequence	Hs.667462	122481	NP_689540	NM_152327
1569700_PM_s_at	1569700_s_at	AK7	adenylate kinase 7	Consensus sequence	Hs.667462	122481	NP_689540	NM_152327
1553734_PM_at	1553734_at	AK7	adenylate kinase 7	Consensus sequence	Hs.667462	122481	NP_689540	NM_152327
241326_PM_at	241326_at	AK7	adenylate kinase 7	Consensus sequence	Hs.667462	122481	NP_689540	NM_152327
210625_PM_s_at	210625_s_at	AKAP1	A kinase (PRKA) anchor protein 1	Exemplar sequence	Hs.463506	8165	NP_003479	NM_003488
210626_PM_at	210626_at	AKAP1	A kinase (PRKA) anchor protein 1	Exemplar sequence	Hs.463506	8165	NP_003479	NM_003488
201674_PM_s_at	201674_s_at	AKAP1	A kinase (PRKA) anchor protein 1	Exemplar sequence	Hs.463506	8165	NP_003479	NM_003488
201675_PM_at	201675_at	AKAP1	A kinase (PRKA) anchor protein 1	Exemplar sequence	Hs.463506	8165	NP_003479	NM_003488
236006_PM_s_at	236006_s_at	AKAP10	A kinase (PRKA) anchor protein 10	Consensus sequence	Hs.642676	11216	NP_009133	NM_007202
213396_PM_s_at	213396_s_at	AKAP10	A kinase (PRKA) anchor protein 10	Consensus sequence	Hs.642676	11216	NP_009133	NM_007202
236007_PM_at	236007_at	AKAP10	A kinase (PRKA) anchor protein 10	Consensus sequence	Hs.642676	11216	NP_009133	NM_007202
205045_PM_at	205045_at	AKAP10	A kinase (PRKA) anchor protein 10	Exemplar sequence	Hs.642676	11216	NP_009133	NM_007202
215336_PM_at	215336_at	AKAP11	A kinase (PRKA) anchor protein 11	Consensus sequence	Hs.105105	11215	NP_057332	NM_016248
203156_PM_at	203156_at	AKAP11	A kinase (PRKA) anchor protein 11	Exemplar sequence	Hs.105105	11215	NP_057332	NM_016248
210517_PM_s_at	210517_s_at	AKAP12	A kinase (PRKA) anchor protein 12	Exemplar sequence	Hs.371240	9590	NP_005091 /// NP_653080	NM_005100 /// NM_144497
227529_PM_s_at	227529_s_at	AKAP12	A kinase (PRKA) anchor protein 12	Consensus sequence	Hs.371240	9590	NP_005091 /// NP_653080	NM_005100 /// NM_144497
231067_PM_s_at	231067_s_at	AKAP12	A kinase (PRKA) anchor protein 12	Consensus sequence	Hs.371240	9590	NP_005091 /// NP_653080	NM_005100 /// NM_144497
227530_PM_at	227530_at	AKAP12	A kinase (PRKA) anchor protein 12	Consensus sequence	Hs.371240	9590	NP_005091 /// NP_653080	NM_005100 /// NM_144497
1555395_PM_at	1555395_at	AKAP12	A kinase (PRKA) anchor protein 12	Consensus sequence	Hs.371240	9590	NP_005091 /// NP_653080	NM_005100 /// NM_144497
227039_PM_at	227039_at	AKAP13	A kinase (PRKA) anchor protein 13	Consensus sequence	Hs.459211	11214	NP_006729 /// NP_009131 /// NP_658913	NM_006738 /// NM_007200 /// NM_144767
208325_PM_s_at	208325_s_at	AKAP13	A kinase (PRKA) anchor protein 13	Exemplar sequence	Hs.459211	11214	NP_006729 /// NP_009131 /// NP_658913	NM_006738 /// NM_007200 /// NM_144767
232188_PM_at	232188_at	AKAP13	A kinase (PRKA) anchor protein 13	Consensus sequence	Hs.459211	11214	NP_006729 /// NP_009131 /// NP_658913	NM_006738 /// NM_007200 /// NM_144767
209534_PM_x_at	209534_x_at	AKAP13	A kinase (PRKA) anchor protein 13	Consensus sequence	Hs.459211	11214	NP_006729 /// NP_009131 /// NP_658913	NM_006738 /// NM_007200 /// NM_144767
222023_PM_at	222023_at	AKAP13	A kinase (PRKA) anchor protein 13	Consensus sequence	Hs.710656	11214	NP_006729 /// NP_009131 /// NP_658913	NM_006738 /// NM_007200 /// NM_144767
221718_PM_s_at	221718_s_at	AKAP13	A kinase (PRKA) anchor protein 13	Exemplar sequence	Hs.459211	11214	NP_006729 /// NP_009131 /// NP_658913	NM_006738 /// NM_007200 /// NM_144767
213516_PM_at	213516_at	AKAP13	A kinase (PRKA) anchor protein 13	Consensus sequence	Hs.710656	11214	NP_006729 /// NP_009131 /// NP_658913	NM_006738 /// NM_007200 /// NM_144767
222024_PM_s_at	222024_s_at	AKAP13	A kinase (PRKA) anchor protein 13	Consensus sequence	Hs.710656	11214	NP_006729 /// NP_009131 /// NP_658913	NM_006738 /// NM_007200 /// NM_144767
224884_PM_at	224884_at	AKAP13	A kinase (PRKA) anchor protein 13	Consensus sequence	Hs.459211	11214	NP_006729 /// NP_009131 /// NP_658913	NM_006738 /// NM_007200 /// NM_144767
242698_PM_at	242698_at	AKAP14	A kinase (PRKA) anchor protein 14	Consensus sequence	Hs.592245	158798	NP_001008534 /// NP_001008535 /// NP_848928	NM_001008534 /// NM_001008535 /// NM_178813
237282_PM_s_at	237282_s_at	AKAP14	A kinase (PRKA) anchor protein 14	Consensus sequence	Hs.592245	158798	NP_001008534 /// NP_001008535 /// NP_848928	NM_001008534 /// NM_001008535 /// NM_178813
237281_PM_at	237281_at	AKAP14	A kinase (PRKA) anchor protein 14	Consensus sequence	Hs.592245	158798	NP_001008534 /// NP_001008535 /// NP_848928	NM_001008534 /// NM_001008535 /// NM_178813
1553502_PM_a_at	1553502_a_at	AKAP2 /// PALM2 /// PALM2-AKAP2	A kinase (PRKA) anchor protein 2 /// paralemmin 2 /// PALM2-AKAP2 readthrough	Consensus sequence	Hs.591908	11217 /// 114299 /// 445815	NP_001004065 /// NP_001032370 /// NP_001130034 /// NP_009134 /// NP_443749 /// NP_671492	NM_001004065 /// NM_001037293 /// NM_001136562 /// NM_007203 /// NM_053016 /// NM_147150
202760_PM_s_at	202760_s_at	AKAP2 /// PALM2-AKAP2	A kinase (PRKA) anchor protein 2 /// PALM2-AKAP2 readthrough	Exemplar sequence	Hs.591908	11217 /// 445815	NP_001004065 /// NP_001130034 /// NP_009134 /// NP_671492	NM_001004065 /// NM_001136562 /// NM_007203 /// NM_147150
226694_PM_at	226694_at	AKAP2 /// PALM2-AKAP2	A kinase (PRKA) anchor protein 2 /// PALM2-AKAP2 readthrough	Consensus sequence	Hs.591908	11217 /// 445815	NP_001004065 /// NP_001130034 /// NP_009134 /// NP_671492	NM_001004065 /// NM_001136562 /// NM_007203 /// NM_147150
202759_PM_s_at	202759_s_at	AKAP2 /// PALM2-AKAP2	A kinase (PRKA) anchor protein 2 /// PALM2-AKAP2 readthrough	Consensus sequence	Hs.591908	11217 /// 445815	NP_001004065 /// NP_001130034 /// NP_009134 /// NP_671492	NM_001004065 /// NM_001136562 /// NM_007203 /// NM_147150
207344_PM_at	207344_at	AKAP3	A kinase (PRKA) anchor protein 3	Exemplar sequence	Hs.98397	10566	NP_006413	NM_006422
207019_PM_s_at	207019_s_at	AKAP4	A kinase (PRKA) anchor protein 4	Exemplar sequence	Hs.97633	8852	NP_003877 /// NP_647450	NM_003886 /// NM_139289
207800_PM_at	207800_at	AKAP5	A kinase (PRKA) anchor protein 5	Exemplar sequence	Hs.656683	9495	NP_004848	NM_004857
230846_PM_at	230846_at	AKAP5	A kinase (PRKA) anchor protein 5	Consensus sequence	Hs.656683	9495	NP_004848	NM_004857
217669_PM_s_at	217669_s_at	AKAP6	A kinase (PRKA) anchor protein 6	Consensus sequence	Hs.509083	9472	NP_004265	NM_004274
205359_PM_at	205359_at	AKAP6	A kinase (PRKA) anchor protein 6	Exemplar sequence	Hs.509083	9472	NP_004265	NM_004274
205771_PM_s_at	205771_s_at	AKAP7	A kinase (PRKA) anchor protein 7	Consensus sequence	Hs.486483	9465	NP_004833 /// NP_057461 /// NP_619539	NM_004842 /// NM_016377 /// NM_138633
211172_PM_x_at	211172_x_at	AKAP7	A kinase (PRKA) anchor protein 7	Exemplar sequence	Hs.486483	9465	NP_004833 /// NP_057461 /// NP_619539	NM_004842 /// NM_016377 /// NM_138633
203848_PM_at	203848_at	AKAP8	A kinase (PRKA) anchor protein 8	Consensus sequence	Hs.724653	10270	NP_005849	NM_005858
203847_PM_s_at	203847_s_at	AKAP8	A kinase (PRKA) anchor protein 8	Consensus sequence	Hs.724653	10270	NP_005849	NM_005858
240554_PM_at	240554_at	AKAP8L	A kinase (PRKA) anchor protein 8-like	Consensus sequence	Hs.399800	26993	NP_055186	NM_014371
215741_PM_x_at	215741_x_at	AKAP8L	A kinase (PRKA) anchor protein 8-like	Consensus sequence	Hs.399800	26993	NP_055186	NM_014371
227691_PM_at	227691_at	AKAP8L	A kinase (PRKA) anchor protein 8-like	Consensus sequence	Hs.399800	26993	NP_055186	NM_014371
218064_PM_s_at	218064_s_at	AKAP8L	A kinase (PRKA) anchor protein 8-like	Exemplar sequence	Hs.399800	26993	NP_055186	NM_014371
222160_PM_at	222160_at	AKAP8L	A kinase (PRKA) anchor protein 8-like	Consensus sequence	Hs.399800	26993	NP_055186	NM_014371
215483_PM_at	215483_at	AKAP9	A kinase (PRKA) anchor protein (yotiao) 9	Consensus sequence	Hs.651221	10142	NP_005742 /// NP_671714	NM_005751 /// NM_147185
207870_PM_at	207870_at	AKAP9	A kinase (PRKA) anchor protein (yotiao) 9	Exemplar sequence	Hs.651221	10142	NP_005742 /// NP_671714	NM_005751 /// NM_147185
210962_PM_s_at	210962_s_at	AKAP9	A kinase (PRKA) anchor protein (yotiao) 9	Exemplar sequence	Hs.651221	10142	NP_005742 /// NP_671714	NM_005751 /// NM_147185
1552299_PM_at	1552299_at	AKD1	adenylate kinase domain containing 1	Consensus sequence	Hs.205144	221264	NP_001138600 /// NP_659462 /// XP_002342726 /// XP_002345981 /// XP_002345992 /// XP_002346863 /// XP_002346888	NM_001145128 /// NM_145025 /// XM_002342685 /// XM_002345940 /// XM_002345951 /// XM_002346822 /// XM_002346847
239828_PM_at	239828_at	AKD1	adenylate kinase domain containing 1	Consensus sequence	Hs.205144	221264	NP_001138600 /// NP_659462 /// XP_002342726 /// XP_002345981 /// XP_002345992 /// XP_002346863 /// XP_002346888	NM_001145128 /// NM_145025 /// XM_002342685 /// XM_002345940 /// XM_002345951 /// XM_002346822 /// XM_002346847
1564002_PM_a_at	1564002_a_at	AKD1	adenylate kinase domain containing 1	Consensus sequence	Hs.205144	221264	NP_001138600 /// NP_659462 /// XP_002342726 /// XP_002345981 /// XP_002345992 /// XP_002346863 /// XP_002346888	NM_001145128 /// NM_145025 /// XM_002342685 /// XM_002345940 /// XM_002345951 /// XM_002346822 /// XM_002346847
217893_PM_s_at	217893_s_at	AKIRIN1	akirin 1	Exemplar sequence	Hs.293563	79647	NP_001129747 /// NP_078871	NM_001136275 /// NM_024595
222458_PM_s_at	222458_s_at	AKIRIN1	akirin 1	Consensus sequence	Hs.293563	79647	NP_001129747 /// NP_078871	NM_001136275 /// NM_024595
222459_PM_at	222459_at	AKIRIN1	akirin 1	Consensus sequence	Hs.293563	79647	NP_001129747 /// NP_078871	NM_001136275 /// NM_024595
223145_PM_s_at	223145_s_at	AKIRIN2	akirin 2	Exemplar sequence	Hs.485915	55122	NP_060534	NM_018064
223144_PM_s_at	223144_s_at	AKIRIN2	akirin 2	Consensus sequence	Hs.485915	55122	NP_060534	NM_018064
223143_PM_s_at	223143_s_at	AKIRIN2	akirin 2	Consensus sequence	Hs.485915	55122	NP_060534	NM_018064
237715_PM_at	237715_at	AKNA	AT-hook transcription factor	Consensus sequence	Hs.494895	80709	NP_110394	NM_030767
1558565_PM_at	1558565_at	AKNA	AT-hook transcription factor	Consensus sequence	Hs.494895	80709	NP_110394	NM_030767
225701_PM_at	225701_at	AKNA	AT-hook transcription factor	Consensus sequence	Hs.494895	80709	NP_110394	NM_030767
1563834_PM_a_at	1563834_a_at	AKNAD1	AKNA domain containing 1	Consensus sequence	Hs.372658	254268	NP_689976	NM_152763
1552933_PM_at	1552933_at	AKNAD1	AKNA domain containing 1	Consensus sequence	Hs.372658	254268	NP_689976	NM_152763
1558834_PM_s_at	1558834_s_at	AKNAD1	AKNA domain containing 1	Consensus sequence	Hs.372658	254268	NP_689976	NM_152763
201900_PM_s_at	201900_s_at	AKR1A1	aldo-keto reductase family 1, member A1 (aldehyde reductase)	Exemplar sequence	Hs.474584	10327	NP_006057 /// NP_697021	NM_006066 /// NM_153326
241978_PM_at	241978_at	AKR1A1	Aldo-keto reductase family 1, member A1 (aldehyde reductase)	Consensus sequence	Hs.474584	10327	NP_006057 /// NP_697021	NM_006066 /// NM_153326
201272_PM_at	201272_at	AKR1B1	aldo-keto reductase family 1, member B1 (aldose reductase)	Exemplar sequence	Hs.521212	231	NP_001619	NM_001628
206561_PM_s_at	206561_s_at	AKR1B10	aldo-keto reductase family 1, member B10 (aldose reductase)	Exemplar sequence	Hs.116724	57016	NP_064695	NM_020299
217626_PM_at	217626_at	AKR1C1	aldo-keto reductase family 1, member C1 (dihydrodiol dehydrogenase 1; 20-alpha (3-alpha)-hydroxysteroid dehydrogenase)	Consensus sequence	Hs.460260	1645	NP_001344	NM_001353
216594_PM_x_at	216594_x_at	AKR1C1	aldo-keto reductase family 1, member C1 (dihydrodiol dehydrogenase 1; 20-alpha (3-alpha)-hydroxysteroid dehydrogenase)	Consensus sequence	Hs.460260	1645	NP_001344	NM_001353
244266_PM_at	244266_at	AKR1C1	aldo-keto reductase family 1, member C1 (dihydrodiol dehydrogenase 1; 20-alpha (3-alpha)-hydroxysteroid dehydrogenase)	Consensus sequence	Hs.460260	1645	NP_001344	NM_001353
1562102_PM_at	1562102_at	AKR1C1	Aldo-keto reductase family 1, member C1 (dihydrodiol dehydrogenase 1; 20-alpha (3-alpha)-hydroxysteroid dehydrogenase)	Consensus sequence	Hs.460260	1645	NP_001344	NM_001353
204151_PM_x_at	204151_x_at	AKR1C1	aldo-keto reductase family 1, member C1 (dihydrodiol dehydrogenase 1; 20-alpha (3-alpha)-hydroxysteroid dehydrogenase)	Exemplar sequence	Hs.460260	1645	NP_001344	NM_001353
1555854_PM_at	1555854_at	AKR1C1 /// AKR1C2	aldo-keto reductase family 1, member C1 (dihydrodiol dehydrogenase 1; 20-alpha (3-alpha)-hydroxysteroid dehydrogenase) /// aldo-keto reductase family 1, member C2 (dihydrodiol dehydrogenase 2; bile acid binding protein; 3-alpha hydroxysteroid dehydrogenase, type III)	Consensus sequence	Hs.567256	1645 /// 1646	NP_001128713 /// NP_001344 /// NP_001345 /// NP_995317	NM_001135241 /// NM_001353 /// NM_001354 /// NM_205845
211653_PM_x_at	211653_x_at	AKR1C2	aldo-keto reductase family 1, member C2 (dihydrodiol dehydrogenase 2; bile acid binding protein; 3-alpha hydroxysteroid dehydrogenase, type III)	Exemplar sequence	Hs.567256	1646	NP_001128713 /// NP_001345 /// NP_995317	NM_001135241 /// NM_001354 /// NM_205845
1560098_PM_at	1560098_at	AKR1C2	Aldo-keto reductase family 1, member C2 (dihydrodiol dehydrogenase 2; bile acid binding protein; 3-alpha hydroxysteroid dehydrogenase, type III)	Consensus sequence	Hs.567256	1646	NP_001128713 /// NP_001345 /// NP_995317	NM_001135241 /// NM_001354 /// NM_205845
209699_PM_x_at	209699_x_at	AKR1C2	aldo-keto reductase family 1, member C2 (dihydrodiol dehydrogenase 2; bile acid binding protein; 3-alpha hydroxysteroid dehydrogenase, type III)	Exemplar sequence	Hs.567256	1646	NP_001128713 /// NP_001345 /// NP_995317	NM_001135241 /// NM_001354 /// NM_205845
209160_PM_at	209160_at	AKR1C3	aldo-keto reductase family 1, member C3 (3-alpha hydroxysteroid dehydrogenase, type II)	Exemplar sequence	Hs.78183	8644	NP_003730	NM_003739
210558_PM_at	210558_at	AKR1C4	aldo-keto reductase family 1, member C4 (chlordecone reductase; 3-alpha hydroxysteroid dehydrogenase, type I; dihydrodiol dehydrogenase 4)	Exemplar sequence	Hs.567245	1109	NP_001809	NM_001818
207102_PM_at	207102_at	AKR1D1	aldo-keto reductase family 1, member D1 (delta 4-3-ketosteroid-5-beta-reductase)	Exemplar sequence	Hs.201667	6718	NP_005980	NM_005989
1559982_PM_s_at	1559982_s_at	AKR1E2	aldo-keto reductase family 1, member E2	Consensus sequence	Hs.657944	83592	NP_001035267	NM_001040177
223856_PM_at	223856_at	AKR1E2	aldo-keto reductase family 1, member E2	Exemplar sequence	Hs.657944	83592	NP_001035267	NM_001040177
1555220_PM_a_at	1555220_a_at	AKR1E2	aldo-keto reductase family 1, member E2	Consensus sequence	Hs.657944	83592	NP_001035267	NM_001040177
202139_PM_at	202139_at	AKR7A2	aldo-keto reductase family 7, member A2 (aflatoxin aldehyde reductase)	Exemplar sequence	Hs.571886	8574	NP_003680	NM_003689
214259_PM_s_at	214259_s_at	AKR7A2	aldo-keto reductase family 7, member A2 (aflatoxin aldehyde reductase)	Consensus sequence	Hs.571886	8574	NP_003680	NM_003689
216381_PM_x_at	216381_x_at	AKR7A3	aldo-keto reductase family 7, member A3 (aflatoxin aldehyde reductase)	Consensus sequence	Hs.6980	22977	NP_036199	NM_012067
206469_PM_x_at	206469_x_at	AKR7A3	aldo-keto reductase family 7, member A3 (aflatoxin aldehyde reductase)	Exemplar sequence	Hs.6980	22977	NP_036199	NM_012067
207163_PM_s_at	207163_s_at	AKT1	v-akt murine thymoma viral oncogene homolog 1	Exemplar sequence	Hs.525622	207	NP_001014431 /// NP_001014432 /// NP_005154	NM_001014431 /// NM_001014432 /// NM_005163
1555821_PM_a_at	1555821_a_at	AKT1S1	AKT1 substrate 1 (proline-rich)	Consensus sequence	Hs.515542	84335	NP_001092102 /// NP_001092103 /// NP_115751	NM_001098632 /// NM_001098633 /// NM_032375
224982_PM_at	224982_at	AKT1S1	AKT1 substrate 1 (proline-rich)	Consensus sequence	Hs.515542	84335	NP_001092102 /// NP_001092103 /// NP_115751	NM_001098632 /// NM_001098633 /// NM_032375
226156_PM_at	226156_at	AKT2	v-akt murine thymoma viral oncogene homolog 2	Consensus sequence	Hs.631535	208	NP_001617	NM_001626
236664_PM_at	236664_at	AKT2	v-akt murine thymoma viral oncogene homolog 2	Consensus sequence	Hs.631535	208	NP_001617	NM_001626
203809_PM_s_at	203809_s_at	AKT2	v-akt murine thymoma viral oncogene homolog 2	Consensus sequence	Hs.631535	208	NP_001617	NM_001626
1560689_PM_s_at	1560689_s_at	AKT2	V-akt murine thymoma viral oncogene homolog 2	Consensus sequence	Hs.631535	208	NP_001617	NM_001626
211453_PM_s_at	211453_s_at	AKT2	v-akt murine thymoma viral oncogene homolog 2	Exemplar sequence	Hs.631535	208	NP_001617	NM_001626
225471_PM_s_at	225471_s_at	AKT2	v-akt murine thymoma viral oncogene homolog 2	Consensus sequence	Hs.631535	208	NP_001617	NM_001626
224229_PM_s_at	224229_s_at	AKT3	v-akt murine thymoma viral oncogene homolog 3 (protein kinase B, gamma)	Exemplar sequence	Hs.498292	10000	NP_005456 /// NP_859029	NM_005465 /// NM_181690
212607_PM_at	212607_at	AKT3	v-akt murine thymoma viral oncogene homolog 3 (protein kinase B, gamma)	Consensus sequence	Hs.498292	10000	NP_005456 /// NP_859029	NM_005465 /// NM_181690
222880_PM_at	222880_at	AKT3	v-akt murine thymoma viral oncogene homolog 3 (protein kinase B, gamma)	Exemplar sequence	Hs.498292	10000	NP_005456 /// NP_859029	NM_005465 /// NM_181690
212609_PM_s_at	212609_s_at	AKT3	V-akt murine thymoma viral oncogene homolog 3 (protein kinase B, gamma)	Consensus sequence	Hs.498292	10000	NP_005456 /// NP_859029	NM_005465 /// NM_181690
219393_PM_s_at	219393_s_at	AKT3	v-akt murine thymoma viral oncogene homolog 3 (protein kinase B, gamma)	Exemplar sequence	Hs.498292	10000	NP_005456 /// NP_859029	NM_005465 /// NM_181690
242876_PM_at	242876_at	AKT3	V-akt murine thymoma viral oncogene homolog 3 (protein kinase B, gamma)	Consensus sequence	Hs.498292	10000	NP_005456 /// NP_859029	NM_005465 /// NM_181690
223894_PM_s_at	223894_s_at	AKTIP	AKT interacting protein	Exemplar sequence	Hs.380897	64400	NP_001012398 /// NP_071921	NM_001012398 /// NM_022476
218373_PM_at	218373_at	AKTIP	AKT interacting protein	Exemplar sequence	Hs.380897	64400	NP_001012398 /// NP_071921	NM_001012398 /// NM_022476
218487_PM_at	218487_at	ALAD	aminolevulinate dehydratase	Exemplar sequence	Hs.1227	210	NP_000022	NM_000031
218489_PM_s_at	218489_s_at	ALAD	aminolevulinate dehydratase	Exemplar sequence	Hs.1227	210	NP_000022	NM_000031
205633_PM_s_at	205633_s_at	ALAS1	aminolevulinate, delta-, synthase 1	Exemplar sequence	Hs.476308	211	NP_000679 /// NP_954635	NM_000688 /// NM_199166
211560_PM_s_at	211560_s_at	ALAS2	aminolevulinate, delta-, synthase 2	Exemplar sequence	Hs.522666	212	NP_000023 /// NP_001033056 /// NP_001033057	NM_000032 /// NM_001037967 /// NM_001037968
244205_PM_at	244205_at	ALAS2	aminolevulinate, delta-, synthase 2	Consensus sequence	Hs.522666	212	NP_000023 /// NP_001033056 /// NP_001033057	NM_000032 /// NM_001037967 /// NM_001037968
1565228_PM_s_at	1565228_s_at	ALB	albumin	Consensus sequence	Hs.418167	213	NP_000468	NM_000477
211298_PM_s_at	211298_s_at	ALB	albumin	Exemplar sequence	Hs.418167	213	NP_000468	NM_000477
201952_PM_at	201952_at	ALCAM	activated leukocyte cell adhesion molecule	Consensus sequence	Hs.591293	214	NP_001618	NM_001627
201951_PM_at	201951_at	ALCAM	activated leukocyte cell adhesion molecule	Consensus sequence	Hs.591293	214	NP_001618	NM_001627
227592_PM_at	227592_at	ALDH16A1	aldehyde dehydrogenase 16 family, member A1	Consensus sequence	Hs.719998	126133	NP_001138868 /// NP_699160	NM_001145396 /// NM_153329
217791_PM_s_at	217791_s_at	ALDH18A1	aldehyde dehydrogenase 18 family, member A1	Exemplar sequence	Hs.500645	5832	NP_001017423 /// NP_002851	NM_001017423 /// NM_002860
222416_PM_at	222416_at	ALDH18A1	aldehyde dehydrogenase 18 family, member A1	Exemplar sequence	Hs.500645	5832	NP_001017423 /// NP_002851	NM_001017423 /// NM_002860
212224_PM_at	212224_at	ALDH1A1	aldehyde dehydrogenase 1 family, member A1	Consensus sequence	Hs.76392	216	NP_000680	NM_000689
207015_PM_s_at	207015_s_at	ALDH1A2	aldehyde dehydrogenase 1 family, member A2	Exemplar sequence	Hs.643455	8854	NP_003879 /// NP_733797 /// NP_733798	NM_003888 /// NM_170696 /// NM_170697
207016_PM_s_at	207016_s_at	ALDH1A2	aldehyde dehydrogenase 1 family, member A2	Exemplar sequence	Hs.643455	8854	NP_003879 /// NP_733797 /// NP_733798	NM_003888 /// NM_170696 /// NM_170697
203180_PM_at	203180_at	ALDH1A3	aldehyde dehydrogenase 1 family, member A3	Exemplar sequence	Hs.459538	220	NP_000684	NM_000693
209646_PM_x_at	209646_x_at	ALDH1B1	aldehyde dehydrogenase 1 family, member B1	Exemplar sequence	Hs.436219	219	NP_000683	NM_000692
209645_PM_s_at	209645_s_at	ALDH1B1	aldehyde dehydrogenase 1 family, member B1	Consensus sequence	Hs.436219	219	NP_000683	NM_000692
205208_PM_at	205208_at	ALDH1L1	aldehyde dehydrogenase 1 family, member L1	Exemplar sequence	Hs.434435	10840	NP_036322	NM_012190
215798_PM_at	215798_at	ALDH1L1	aldehyde dehydrogenase 1 family, member L1	Consensus sequence	Hs.434435	10840	NP_036322	NM_012190
1559393_PM_at	1559393_at	ALDH1L2	aldehyde dehydrogenase 1 family, member L2	Consensus sequence	Hs.42572	160428	NP_001029345	NM_001034173 /// NR_027752
231202_PM_at	231202_at	ALDH1L2	aldehyde dehydrogenase 1 family, member L2	Consensus sequence	Hs.42572	160428	NP_001029345	NM_001034173 /// NR_027752
1556841_PM_a_at	1556841_a_at	ALDH1L2	aldehyde dehydrogenase 1 family, member L2	Consensus sequence	Hs.42572	160428	NP_001029345	NM_001034173 /// NR_027752
201425_PM_at	201425_at	ALDH2	aldehyde dehydrogenase 2 family (mitochondrial)	Exemplar sequence	Hs.632733	217	NP_000681	NM_000690
205623_PM_at	205623_at	ALDH3A1	aldehyde dehydrogenase 3 family, member A1	Exemplar sequence	Hs.531682	218	NP_000682 /// NP_001128639 /// NP_001128640	NM_000691 /// NM_001135167 /// NM_001135168
202054_PM_s_at	202054_s_at	ALDH3A2	aldehyde dehydrogenase 3 family, member A2	Exemplar sequence	Hs.499886	224	NP_000373 /// NP_001026976	NM_000382 /// NM_001031806
210544_PM_s_at	210544_s_at	ALDH3A2	aldehyde dehydrogenase 3 family, member A2	Exemplar sequence	Hs.499886	224	NP_000373 /// NP_001026976	NM_000382 /// NM_001031806
202053_PM_s_at	202053_s_at	ALDH3A2	aldehyde dehydrogenase 3 family, member A2	Exemplar sequence	Hs.499886	224	NP_000373 /// NP_001026976	NM_000382 /// NM_001031806
211004_PM_s_at	211004_s_at	ALDH3B1	aldehyde dehydrogenase 3 family, member B1	Exemplar sequence	Hs.523841	221	NP_000685 /// NP_001025181 /// NP_001154945	NM_000694 /// NM_001030010 /// NM_001161473
205640_PM_at	205640_at	ALDH3B1	aldehyde dehydrogenase 3 family, member B1	Exemplar sequence	Hs.523841	221	NP_000685 /// NP_001025181 /// NP_001154945	NM_000694 /// NM_001030010 /// NM_001161473
1565731_PM_at	1565731_at	ALDH3B1	aldehyde dehydrogenase 3 family, member B1	Consensus sequence	Hs.523841	221	NP_000685 /// NP_001025181 /// NP_001154945	NM_000694 /// NM_001030010 /// NM_001161473
204941_PM_s_at	204941_s_at	ALDH3B2	aldehyde dehydrogenase 3 family, member B2	Consensus sequence	Hs.87539	222	NP_000686 /// NP_001026786	NM_000695 /// NM_001031615
204942_PM_s_at	204942_s_at	ALDH3B2	aldehyde dehydrogenase 3 family, member B2	Exemplar sequence	Hs.87539	222	NP_000686 /// NP_001026786	NM_000695 /// NM_001031615
211552_PM_s_at	211552_s_at	ALDH4A1	aldehyde dehydrogenase 4 family, member A1	Exemplar sequence	Hs.77448	8659	NP_001154976 /// NP_003739 /// NP_733844	NM_001161504 /// NM_003748 /// NM_170726
203722_PM_at	203722_at	ALDH4A1	aldehyde dehydrogenase 4 family, member A1	Exemplar sequence	Hs.77448	8659	NP_001154976 /// NP_003739 /// NP_733844	NM_001161504 /// NM_003748 /// NM_170726
203609_PM_s_at	203609_s_at	ALDH5A1	aldehyde dehydrogenase 5 family, member A1	Exemplar sequence	Hs.371723	7915	NP_001071 /// NP_733936	NM_001080 /// NM_170740
203608_PM_at	203608_at	ALDH5A1	aldehyde dehydrogenase 5 family, member A1	Consensus sequence	Hs.371723	7915	NP_001071 /// NP_733936	NM_001080 /// NM_170740
221588_PM_x_at	221588_x_at	ALDH6A1	aldehyde dehydrogenase 6 family, member A1	Consensus sequence	Hs.293970	4329	NP_005580	NM_005589
204290_PM_s_at	204290_s_at	ALDH6A1	aldehyde dehydrogenase 6 family, member A1	Exemplar sequence	Hs.293970	4329	NP_005580	NM_005589
204289_PM_at	204289_at	ALDH6A1	aldehyde dehydrogenase 6 family, member A1	Consensus sequence	Hs.293970	4329	NP_005580	NM_005589
221589_PM_s_at	221589_s_at	ALDH6A1	aldehyde dehydrogenase 6 family, member A1	Consensus sequence	Hs.293970	4329	NP_005580	NM_005589
208950_PM_s_at	208950_s_at	ALDH7A1	aldehyde dehydrogenase 7 family, member A1	Exemplar sequence	Hs.483239	501	NP_001173	NM_001182
213591_PM_at	213591_at	ALDH7A1	aldehyde dehydrogenase 7 family, member A1	Consensus sequence	Hs.483239	501	NP_001173	NM_001182
208951_PM_at	208951_at	ALDH7A1	aldehyde dehydrogenase 7 family, member A1	Exemplar sequence	Hs.483239	501	NP_001173	NM_001182
220148_PM_at	220148_at	ALDH8A1	aldehyde dehydrogenase 8 family, member A1	Exemplar sequence	Hs.486520	64577	NP_072090 /// NP_739577	NM_022568 /// NM_170771
201612_PM_at	201612_at	ALDH9A1	aldehyde dehydrogenase 9 family, member A1	Exemplar sequence	Hs.2533	223	NP_000687	NM_000696
200966_PM_x_at	200966_x_at	ALDOA	aldolase A, fructose-bisphosphate	Exemplar sequence	Hs.513490	226	NP_000025 /// NP_001121089 /// NP_908930 /// NP_908932	NM_000034 /// NM_001127617 /// NM_184041 /// NM_184043
214687_PM_x_at	214687_x_at	ALDOA	aldolase A, fructose-bisphosphate	Consensus sequence	Hs.513490	226	NP_000025 /// NP_001121089 /// NP_908930 /// NP_908932	NM_000034 /// NM_001127617 /// NM_184041 /// NM_184043
238996_PM_x_at	238996_x_at	ALDOA	aldolase A, fructose-bisphosphate	Consensus sequence	Hs.513490	226	NP_000025 /// NP_001121089 /// NP_908930 /// NP_908932	NM_000034 /// NM_001127617 /// NM_184041 /// NM_184043
211617_PM_at	211617_at	ALDOAP2	aldolase A, fructose-bisphosphate pseudogene 2	Exemplar sequence	Hs.652473	228	---	---
217238_PM_s_at	217238_s_at	ALDOB	aldolase B, fructose-bisphosphate	Consensus sequence	Hs.530274	229	NP_000026	NM_000035
216600_PM_x_at	216600_x_at	ALDOB	Aldolase B, fructose-bisphosphate	Consensus sequence	Hs.530274	229	NP_000026	NM_000035
243901_PM_at	243901_at	ALDOB	aldolase B, fructose-bisphosphate	Consensus sequence	Hs.530274	229	NP_000026	NM_000035
241280_PM_at	241280_at	ALDOB	Aldolase B, fructose-bisphosphate	Consensus sequence	Hs.530274	229	NP_000026	NM_000035
214424_PM_s_at	214424_s_at	ALDOB	Aldolase B, fructose-bisphosphate	Consensus sequence	Hs.530274	229	NP_000026	NM_000035
204705_PM_x_at	204705_x_at	ALDOB	aldolase B, fructose-bisphosphate	Exemplar sequence	Hs.530274	229	NP_000026	NM_000035
204704_PM_s_at	204704_s_at	ALDOB	aldolase B, fructose-bisphosphate	Consensus sequence	Hs.530274	229	NP_000026	NM_000035
214423_PM_x_at	214423_x_at	ALDOB	Aldolase B, fructose-bisphosphate	Consensus sequence	Hs.530274	229	NP_000026	NM_000035
211357_PM_s_at	211357_s_at	ALDOB	aldolase B, fructose-bisphosphate	Exemplar sequence	Hs.530274	229	NP_000026	NM_000035
202022_PM_at	202022_at	ALDOC	aldolase C, fructose-bisphosphate	Exemplar sequence	Hs.155247	230	NP_005156	NM_005165
236626_PM_at	236626_at	ALG1	asparagine-linked glycosylation 1, beta-1,4-mannosyltransferase homolog (S. cerevisiae)	Consensus sequence	Hs.592086	56052	NP_061982	NM_019109
223355_PM_at	223355_at	ALG1	asparagine-linked glycosylation 1, beta-1,4-mannosyltransferase homolog (S. cerevisiae)	Exemplar sequence	Hs.592086	56052	NP_061982	NM_019109
1552306_PM_at	1552306_at	ALG10	asparagine-linked glycosylation 10, alpha-1,2-glucosyltransferase homolog (S. pombe)	Consensus sequence	Hs.102971	84920	NP_116223	NM_032834
1552304_PM_at	1552304_at	ALG10	asparagine-linked glycosylation 10, alpha-1,2-glucosyltransferase homolog (S. pombe)	Consensus sequence	Hs.102971	84920	NP_116223	NM_032834
242900_PM_at	242900_at	ALG10B	asparagine-linked glycosylation 10, alpha-1,2-glucosyltransferase homolog B (yeast)	Consensus sequence	Hs.259305	144245	NP_001013642	NM_001013620
238475_PM_at	238475_at	ALG10B	asparagine-linked glycosylation 10, alpha-1,2-glucosyltransferase homolog B (yeast)	Consensus sequence	Hs.259305	144245	NP_001013642	NM_001013620
228941_PM_at	228941_at	ALG10B	asparagine-linked glycosylation 10, alpha-1,2-glucosyltransferase homolog B (yeast)	Consensus sequence	Hs.259305	144245	NP_001013642	NM_001013620
218444_PM_at	218444_at	ALG12	asparagine-linked glycosylation 12, alpha-1,6-mannosyltransferase homolog (S. cerevisiae)	Exemplar sequence	Hs.526711	79087	NP_077010	NM_024105
222808_PM_at	222808_at	ALG13	asparagine-linked glycosylation 13 homolog (S. cerevisiae)	Exemplar sequence	Hs.443061	79868	NP_001034299 /// NP_001093392 /// NP_001161857 /// NP_060936	NM_001039210 /// NM_001099922 /// NM_001168385 /// NM_018466 /// NR_033124 /// NR_033125 /// NR_033127 /// NR_033128 /// NR_033129 /// NR_033131 /// NR_033132 /// NR_033134
219015_PM_s_at	219015_s_at	ALG13	asparagine-linked glycosylation 13 homolog (S. cerevisiae)	Exemplar sequence	Hs.443061	79868	NP_001034299 /// NP_001093392 /// NP_001161857 /// NP_060936	NM_001039210 /// NM_001099922 /// NM_001168385 /// NM_018466 /// NR_033124 /// NR_033125 /// NR_033127 /// NR_033128 /// NR_033129 /// NR_033131 /// NR_033132 /// NR_033134
205583_PM_s_at	205583_s_at	ALG13	asparagine-linked glycosylation 13 homolog (S. cerevisiae)	Exemplar sequence	Hs.443061	79868	NP_001034299 /// NP_001093392 /// NP_001161857 /// NP_060936	NM_001039210 /// NM_001099922 /// NM_001168385 /// NM_018466 /// NR_033124 /// NR_033125 /// NR_033127 /// NR_033128 /// NR_033129 /// NR_033131 /// NR_033132 /// NR_033134
205584_PM_at	205584_at	ALG13	asparagine-linked glycosylation 13 homolog (S. cerevisiae)	Exemplar sequence	Hs.443061	79868	NP_001034299 /// NP_001093392 /// NP_001161857 /// NP_060936	NM_001039210 /// NM_001099922 /// NM_001168385 /// NM_018466 /// NR_033124 /// NR_033125 /// NR_033127 /// NR_033128 /// NR_033129 /// NR_033131 /// NR_033132 /// NR_033134
1553954_PM_at	1553954_at	ALG14	asparagine-linked glycosylation 14 homolog (S. cerevisiae)	Consensus sequence	Hs.408927	199857	NP_659425	NM_144988
228166_PM_at	228166_at	ALG2	Asparagine-linked glycosylation 2, alpha-1,3-mannosyltransferase homolog (S. cerevisiae)	Consensus sequence	Hs.40919	85365	NP_149078	NM_033087 /// NR_024532
225621_PM_at	225621_at	ALG2	asparagine-linked glycosylation 2, alpha-1,3-mannosyltransferase homolog (S. cerevisiae)	Consensus sequence	Hs.40919	85365	NP_149078	NM_033087 /// NR_024532
207396_PM_s_at	207396_s_at	ALG3	asparagine-linked glycosylation 3, alpha-1,3- mannosyltransferase homolog (S. cerevisiae)	Exemplar sequence	Hs.478481	10195	NP_001006942 /// NP_005778	NM_001006941 /// NM_005787 /// NR_024533 /// NR_024534
218203_PM_at	218203_at	ALG5	asparagine-linked glycosylation 5, dolichyl-phosphate beta-glucosyltransferase homolog (S. cerevisiae)	Exemplar sequence	Hs.507769	29880	NP_001135836 /// NP_037470	NM_001142364 /// NM_013338
219649_PM_at	219649_at	ALG6	asparagine-linked glycosylation 6, alpha-1,3-glucosyltransferase homolog (S. cerevisiae)	Exemplar sequence	Hs.258501	29929	NP_037471	NM_013339
203545_PM_at	203545_at	ALG8	asparagine-linked glycosylation 8, alpha-1,3-glucosyltransferase homolog (S. cerevisiae)	Exemplar sequence	Hs.503368	79053	NP_001007028 /// NP_076984	NM_001007027 /// NM_024079
228817_PM_at	228817_at	ALG9	asparagine-linked glycosylation 9, alpha-1,2-mannosyltransferase homolog (S. cerevisiae)	Consensus sequence	Hs.724748	79796	NP_001071158 /// NP_001071159 /// NP_001071160 /// NP_079016	NM_001077690 /// NM_001077691 /// NM_001077692 /// NM_024740
219374_PM_s_at	219374_s_at	ALG9	asparagine-linked glycosylation 9, alpha-1,2-mannosyltransferase homolog (S. cerevisiae)	Exemplar sequence	Hs.724748	79796	NP_001071158 /// NP_001071159 /// NP_001071160 /// NP_079016	NM_001077690 /// NM_001077691 /// NM_001077692 /// NM_024740
208212_PM_s_at	208212_s_at	ALK	anaplastic lymphoma receptor tyrosine kinase	Exemplar sequence	Hs.654469	238	NP_004295	NM_004304
208211_PM_s_at	208211_s_at	ALK	anaplastic lymphoma receptor tyrosine kinase	Exemplar sequence	Hs.654469	238	NP_004295	NM_004304
236721_PM_at	236721_at	ALKBH1	alkB, alkylation repair homolog 1 (E. coli)	Consensus sequence	Hs.94542	8846	NP_006011	NM_006020
205621_PM_at	205621_at	ALKBH1	alkB, alkylation repair homolog 1 (E. coli)	Exemplar sequence	Hs.94542	8846	NP_006011	NM_006020
225625_PM_at	225625_at	ALKBH2	alkB, alkylation repair homolog 2 (E. coli)	Consensus sequence	Hs.374458	121642	NP_001001655 /// NP_001138846 /// NP_001138847	NM_001001655 /// NM_001145374 /// NM_001145375 /// NR_026930 /// NR_026931
226127_PM_at	226127_at	ALKBH3	alkB, alkylation repair homolog 3 (E. coli)	Consensus sequence	Hs.720708	221120	NP_631917	NM_139178
222228_PM_s_at	222228_s_at	ALKBH4	alkB, alkylation repair homolog 4 (E. coli)	Consensus sequence	Hs.658598	54784	NP_060091	NM_017621
234302_PM_s_at	234302_s_at	ALKBH5	alkB, alkylation repair homolog 5 (E. coli)	Consensus sequence	Hs.462392	54890	NP_060228	NM_017758
1553101_PM_a_at	1553101_a_at	ALKBH5	alkB, alkylation repair homolog 5 (E. coli)	Consensus sequence	Hs.462392	54890	NP_060228	NM_017758
228034_PM_x_at	228034_x_at	ALKBH5	alkB, alkylation repair homolog 5 (E. coli)	Consensus sequence	Hs.462392	54890	NP_060228	NM_017758
225969_PM_at	225969_at	ALKBH6	alkB, alkylation repair homolog 6 (E. coli)	Consensus sequence	Hs.71941	84964	NP_116267 /// NP_942567	NM_032878 /// NM_198867
227879_PM_at	227879_at	ALKBH7	AlkB, alkylation repair homolog 7 (E. coli)	Consensus sequence	Hs.111099	84266	NP_115682	NM_032306
227878_PM_s_at	227878_s_at	ALKBH7	alkB, alkylation repair homolog 7 (E. coli)	Consensus sequence	Hs.111099	84266	NP_115682	NM_032306
223318_PM_s_at	223318_s_at	ALKBH7	alkB, alkylation repair homolog 7 (E. coli)	Exemplar sequence	Hs.111099	84266	NP_115682	NM_032306
223317_PM_at	223317_at	ALKBH7	alkB, alkylation repair homolog 7 (E. coli)	Consensus sequence	Hs.111099	84266	NP_115682	NM_032306
235713_PM_at	235713_at	ALKBH8	alkB, alkylation repair homolog 8 (E. coli)	Consensus sequence	Hs.503763	91801	NP_620130	NM_138775
235610_PM_at	235610_at	ALKBH8	alkB, alkylation repair homolog 8 (E. coli)	Consensus sequence	Hs.503763	91801	NP_620130	NM_138775
220365_PM_at	220365_at	ALLC	allantoicase	Exemplar sequence	Hs.97899	55821	NP_060906	NM_018436
214220_PM_s_at	214220_s_at	ALMS1	Alstrom syndrome 1	Consensus sequence	Hs.184720	7840	NP_055935	NM_015120
214707_PM_x_at	214707_x_at	ALMS1	Alstrom syndrome 1	Consensus sequence	Hs.184720	7840	NP_055935	NM_015120
214221_PM_at	214221_at	ALMS1	Alstrom syndrome 1	Consensus sequence	Hs.184720	7840	NP_055935	NM_015120
1552576_PM_at	1552576_at	ALMS1P	Alstrom syndrome 1 pseudogene	Consensus sequence	Hs.278983	200420	---	NR_003683
207206_PM_s_at	207206_s_at	ALOX12	arachidonate 12-lipoxygenase	Exemplar sequence	Hs.654431	239	NP_000688	NM_000697
207381_PM_at	207381_at	ALOX12B	arachidonate 12-lipoxygenase, 12R type	Exemplar sequence	Hs.136574	242	NP_001130	NM_001139
214340_PM_at	214340_at	ALOX12P2	arachidonate 12-lipoxygenase pseudogene 2	Consensus sequence	Hs.378695	245	---	NR_002710
207328_PM_at	207328_at	ALOX15	arachidonate 15-lipoxygenase	Exemplar sequence	Hs.73809	246	NP_001131	NM_001140
1555416_PM_a_at	1555416_a_at	ALOX15B	arachidonate 15-lipoxygenase, type B	Consensus sequence	Hs.111256	247	NP_001034219 /// NP_001034220 /// NP_001132	NM_001039130 /// NM_001039131 /// NM_001141
206714_PM_at	206714_at	ALOX15B	arachidonate 15-lipoxygenase, type B	Exemplar sequence	Hs.111256	247	NP_001034219 /// NP_001034220 /// NP_001132	NM_001039130 /// NM_001039131 /// NM_001141
204446_PM_s_at	204446_s_at	ALOX5	arachidonate 5-lipoxygenase	Exemplar sequence	Hs.89499	240	NP_000689	NM_000698
213952_PM_s_at	213952_s_at	ALOX5	Arachidonate 5-lipoxygenase	Consensus sequence	Hs.89499	240	NP_000689	NM_000698
214366_PM_s_at	214366_s_at	ALOX5	arachidonate 5-lipoxygenase	Consensus sequence	Hs.89499	240	NP_000689	NM_000698
204445_PM_s_at	204445_s_at	ALOX5	arachidonate 5-lipoxygenase	Consensus sequence	Hs.89499	240	NP_000689	NM_000698
204174_PM_at	204174_at	ALOX5AP	arachidonate 5-lipoxygenase-activating protein	Exemplar sequence	Hs.507658	241	NP_001620	NM_001629
222383_PM_s_at	222383_s_at	ALOXE3	arachidonate lipoxygenase 3	Consensus sequence	Hs.232770	59344	NP_001159432 /// NP_067641	NM_001165960 /// NM_021628
207708_PM_at	207708_at	ALOXE3	arachidonate lipoxygenase 3	Exemplar sequence	Hs.232770	59344	NP_001159432 /// NP_067641	NM_001165960 /// NM_021628
211618_PM_s_at	211618_s_at	ALPI	alkaline phosphatase, intestinal	Exemplar sequence	Hs.37009	248	NP_001622	NM_001631
207140_PM_at	207140_at	ALPI	alkaline phosphatase, intestinal	Exemplar sequence	Hs.37009	248	NP_001622	NM_001631
227438_PM_at	227438_at	ALPK1	alpha-kinase 1	Consensus sequence	Hs.652825	80216	NP_001095876 /// NP_079420	NM_001102406 /// NM_025144
243352_PM_at	243352_at	ALPK1	alpha-kinase 1	Consensus sequence	Hs.652825	80216	NP_001095876 /// NP_079420	NM_001102406 /// NM_025144
207133_PM_x_at	207133_x_at	ALPK1	alpha-kinase 1	Exemplar sequence	Hs.652825	80216	NP_001095876 /// NP_079420	NM_001102406 /// NM_025144
228367_PM_at	228367_at	ALPK2	alpha-kinase 2	Consensus sequence	Hs.628152	115701	NP_443179	NM_052947
228342_PM_s_at	228342_s_at	ALPK3	alpha-kinase 3	Consensus sequence	Hs.459183	57538	NP_065829	NM_020778
214846_PM_s_at	214846_s_at	ALPK3	alpha-kinase 3	Consensus sequence	Hs.459183	57538	NP_065829	NM_020778
1557924_PM_s_at	1557924_s_at	ALPL	alkaline phosphatase, liver/bone/kidney	Consensus sequence	Hs.75431	249	NP_000469 /// NP_001120973 /// NP_001170991	NM_000478 /// NM_001127501 /// NM_001177520
215783_PM_s_at	215783_s_at	ALPL	alkaline phosphatase, liver/bone/kidney	Consensus sequence	Hs.75431	249	NP_000469 /// NP_001120973 /// NP_001170991	NM_000478 /// NM_001127501 /// NM_001177520
204664_PM_at	204664_at	ALPP	alkaline phosphatase, placental (Regan isozyme)	Exemplar sequence	Hs.284255	250	NP_001623	NM_001632
211619_PM_s_at	211619_s_at	ALPP /// ALPPL2	alkaline phosphatase, placental (Regan isozyme) /// alkaline phosphatase, placental-like 2	Exemplar sequence	Hs.284255	250 /// 251	NP_001623 /// NP_112603	NM_001632 /// NM_031313
216377_PM_x_at	216377_x_at	ALPPL2	alkaline phosphatase, placental-like 2	Consensus sequence	Hs.333509	251	NP_112603	NM_031313
210431_PM_at	210431_at	ALPPL2	alkaline phosphatase, placental-like 2	Exemplar sequence	Hs.333509	251	NP_112603	NM_031313
232184_PM_at	232184_at	ALS2	amyotrophic lateral sclerosis 2 (juvenile)	Consensus sequence	Hs.471096	57679	NP_001129217 /// NP_065970	NM_001135745 /// NM_020919
226291_PM_at	226291_at	ALS2	amyotrophic lateral sclerosis 2 (juvenile)	Consensus sequence	Hs.471096	57679	NP_001129217 /// NP_065970	NM_001135745 /// NM_020919
1555284_PM_at	1555284_at	ALS2	amyotrophic lateral sclerosis 2 (juvenile)	Consensus sequence	Hs.471096	57679	NP_001129217 /// NP_065970	NM_001135745 /// NM_020919
243276_PM_at	243276_at	ALS2CL	ALS2 C-terminal like	Consensus sequence	Hs.517937	259173	NP_667340 /// NP_877576	NM_147129 /// NM_182775
229887_PM_at	229887_at	ALS2CL	ALS2 C-terminal like	Consensus sequence	Hs.517937	259173	NP_667340 /// NP_877576	NM_147129 /// NM_182775
222333_PM_at	222333_at	ALS2CL	ALS2 C-terminal like	Consensus sequence	Hs.517937	259173	NP_667340 /// NP_877576	NM_147129 /// NM_182775
1556924_PM_at	1556924_at	ALS2CR10	amyotrophic lateral sclerosis 2 (juvenile) chromosome region, candidate 10	Consensus sequence	Hs.664613	65072	---	---
1554831_PM_x_at	1554831_x_at	ALS2CR11	amyotrophic lateral sclerosis 2 (juvenile) chromosome region, candidate 11	Consensus sequence	Hs.335788	151254	NP_001161688 /// NP_001161689 /// NP_001161693 /// NP_689738	NM_001168216 /// NM_001168217 /// NM_001168221 /// NM_152525
1553261_PM_x_at	1553261_x_at	ALS2CR11	amyotrophic lateral sclerosis 2 (juvenile) chromosome region, candidate 11	Consensus sequence	Hs.335788	151254	NP_001161688 /// NP_001161689 /// NP_001161693 /// NP_689738	NM_001168216 /// NM_001168217 /// NM_001168221 /// NM_152525
1553260_PM_s_at	1553260_s_at	ALS2CR11	amyotrophic lateral sclerosis 2 (juvenile) chromosome region, candidate 11	Consensus sequence	Hs.335788	151254	NP_001161688 /// NP_001161689 /// NP_001161693 /// NP_689738	NM_001168216 /// NM_001168217 /// NM_001168221 /// NM_152525
1563673_PM_a_at	1563673_a_at	ALS2CR11	amyotrophic lateral sclerosis 2 (juvenile) chromosome region, candidate 11	Consensus sequence	Hs.335788	151254	NP_001161688 /// NP_001161689 /// NP_001161693 /// NP_689738	NM_001168216 /// NM_001168217 /// NM_001168221 /// NM_152525
1558428_PM_at	1558428_at	ALS2CR11	amyotrophic lateral sclerosis 2 (juvenile) chromosome region, candidate 11	Consensus sequence	Hs.335788	151254	NP_001161688 /// NP_001161689 /// NP_001161693 /// NP_689738	NM_001168216 /// NM_001168217 /// NM_001168221 /// NM_152525
1556757_PM_a_at	1556757_a_at	ALS2CR11	amyotrophic lateral sclerosis 2 (juvenile) chromosome region, candidate 11	Consensus sequence	Hs.335788	151254	NP_001161688 /// NP_001161689 /// NP_001161693 /// NP_689738	NM_001168216 /// NM_001168217 /// NM_001168221 /// NM_152525
242661_PM_x_at	242661_x_at	ALS2CR12	amyotrophic lateral sclerosis 2 (juvenile) chromosome region, candidate 12	Consensus sequence	Hs.107944	130540	NP_001120863 /// NP_631902	NM_001127391 /// NM_139163
239458_PM_at	239458_at	ALS2CR12	amyotrophic lateral sclerosis 2 (juvenile) chromosome region, candidate 12	Consensus sequence	Hs.107944	130540	NP_001120863 /// NP_631902	NM_001127391 /// NM_139163
1553956_PM_at	1553956_at	ALS2CR4	amyotrophic lateral sclerosis 2 (juvenile) chromosome region, candidate 4	Consensus sequence	Hs.12319	65062	NP_001037850 /// NP_689601	NM_001044385 /// NM_152388
228255_PM_at	228255_at	ALS2CR4	amyotrophic lateral sclerosis 2 (juvenile) chromosome region, candidate 4	Consensus sequence	Hs.12319	65062	NP_001037850 /// NP_689601	NM_001044385 /// NM_152388
1555391_PM_a_at	1555391_a_at	ALS2CR8	amyotrophic lateral sclerosis 2 (juvenile) chromosome region, candidate 8	Consensus sequence	Hs.444982	79800	NP_001098056 /// NP_079020	NM_001104586 /// NM_024744
219834_PM_at	219834_at	ALS2CR8	amyotrophic lateral sclerosis 2 (juvenile) chromosome region, candidate 8	Exemplar sequence	Hs.444982	79800	NP_001098056 /// NP_079020	NM_001104586 /// NM_024744
206837_PM_at	206837_at	ALX1	ALX homeobox 1	Exemplar sequence	Hs.41683	8092	NP_008913	NM_006982
207690_PM_at	207690_at	ALX3	ALX homeobox 3	Exemplar sequence	Hs.669953	257	NP_006483	NM_006492
208330_PM_at	208330_at	ALX4	ALX homeobox 4	Exemplar sequence	Hs.436055	60529	NP_068745	NM_021926
1553471_PM_at	1553471_at	AMAC1	acyl-malonyl condensing enzyme 1	Consensus sequence	Hs.514814	146861	NP_689675	NM_152462
1553340_PM_s_at	1553340_s_at	AMAC1 /// AMAC1L2	acyl-malonyl condensing enzyme 1 /// acyl-malonyl condensing enzyme 1-like 2	Consensus sequence	Hs.458397	146861 /// 83650	NP_473369 /// NP_689675	NM_054028 /// NM_152462
236365_PM_at	236365_at	AMACR	alpha-methylacyl-CoA racemase	Consensus sequence	Hs.508343	23600	NP_001161067 /// NP_001161068 /// NP_001161069 /// NP_001161070 /// NP_055139 /// NP_976316	NM_001167595 /// NM_001167596 /// NM_001167597 /// NM_001167598 /// NM_014324 /// NM_203382
217113_PM_at	217113_at	AMACR	alpha-methylacyl-CoA racemase	Consensus sequence	Hs.508343	23600	NP_001161067 /// NP_001161068 /// NP_001161069 /// NP_001161070 /// NP_055139 /// NP_976316	NM_001167595 /// NM_001167596 /// NM_001167597 /// NM_001167598 /// NM_014324 /// NM_203382
217111_PM_at	217111_at	AMACR	alpha-methylacyl-CoA racemase	Consensus sequence	Hs.508343	23600	NP_001161067 /// NP_001161068 /// NP_001161069 /// NP_001161070 /// NP_055139 /// NP_976316	NM_001167595 /// NM_001167596 /// NM_001167597 /// NM_001167598 /// NM_014324 /// NM_203382
209425_PM_at	209425_at	AMACR /// C1QTNF3	alpha-methylacyl-CoA racemase /// C1q and tumor necrosis factor related protein 3	Consensus sequence	Hs.171929	114899 /// 23600	NP_001161067 /// NP_001161068 /// NP_001161069 /// NP_001161070 /// NP_055139 /// NP_112207 /// NP_852100 /// NP_976316	NM_001167595 /// NM_001167596 /// NM_001167597 /// NM_001167598 /// NM_014324 /// NM_030945 /// NM_181435 /// NM_203382
209424_PM_s_at	209424_s_at	AMACR /// C1QTNF3	alpha-methylacyl-CoA racemase /// C1q and tumor necrosis factor related protein 3	Consensus sequence	Hs.171929	114899 /// 23600	NP_001161067 /// NP_001161068 /// NP_001161069 /// NP_001161070 /// NP_055139 /// NP_112207 /// NP_852100 /// NP_976316	NM_001167595 /// NM_001167596 /// NM_001167597 /// NM_001167598 /// NM_014324 /// NM_030945 /// NM_181435 /// NM_203382
209426_PM_s_at	209426_s_at	AMACR /// C1QTNF3	alpha-methylacyl-CoA racemase /// C1q and tumor necrosis factor related protein 3	Exemplar sequence	Hs.171929	114899 /// 23600	NP_001161067 /// NP_001161068 /// NP_001161069 /// NP_001161070 /// NP_055139 /// NP_112207 /// NP_852100 /// NP_976316	NM_001167595 /// NM_001167596 /// NM_001167597 /// NM_001167598 /// NM_014324 /// NM_030945 /// NM_181435 /// NM_203382
221114_PM_at	221114_at	AMBN	ameloblastin (enamel matrix protein)	Exemplar sequence	Hs.272396	258	NP_057603	NM_016519
205477_PM_s_at	205477_s_at	AMBP	alpha-1-microglobulin/bikunin precursor	Exemplar sequence	Hs.436911	259	NP_001624	NM_001633
214425_PM_at	214425_at	AMBP	Alpha-1-microglobulin/bikunin precursor	Consensus sequence	Hs.436911	259	NP_001624	NM_001633
234237_PM_s_at	234237_s_at	AMBRA1	autophagy/beclin-1 regulator 1	Consensus sequence	Hs.654644	55626	NP_060219	NM_017749
219141_PM_s_at	219141_s_at	AMBRA1	autophagy/beclin-1 regulator 1	Exemplar sequence	Hs.654644	55626	NP_060219	NM_017749
52731_PM_at	52731_at	AMBRA1	autophagy/beclin-1 regulator 1	Consensus sequence	Hs.654644	55626	NP_060219	NM_017749
234236_PM_at	234236_at	AMBRA1	autophagy/beclin-1 regulator 1	Consensus sequence	Hs.654644	55626	NP_060219	NM_017749
201197_PM_at	201197_at	AMD1	adenosylmethionine decarboxylase 1	Exemplar sequence	Hs.159118	262	NP_001028231 /// NP_001625	NM_001033059 /// NM_001634
201196_PM_s_at	201196_s_at	AMD1	adenosylmethionine decarboxylase 1	Exemplar sequence	Hs.159118	262	NP_001028231 /// NP_001625	NM_001033059 /// NM_001634
229596_PM_at	229596_at	AMDHD1	amidohydrolase domain containing 1	Consensus sequence	Hs.424907	144193	NP_689648	NM_152435
219082_PM_at	219082_at	AMDHD2	amidohydrolase domain containing 2	Exemplar sequence	Hs.720184	51005	NP_001139287 /// NP_057028	NM_001145815 /// NM_015944
208410_PM_x_at	208410_x_at	AMELX	amelogenin, X-linked	Exemplar sequence	Hs.654436	265	NP_001133 /// NP_872621 /// NP_872622	NM_001142 /// NM_182680 /// NM_182681
208220_PM_x_at	208220_x_at	AMELY	amelogenin, Y-linked	Exemplar sequence	Hs.1238	266	NP_001134	NM_001143
202203_PM_s_at	202203_s_at	AMFR	autocrine motility factor receptor	Exemplar sequence	Hs.295137	267	NP_001135	NM_001144
202204_PM_s_at	202204_s_at	AMFR	autocrine motility factor receptor	Exemplar sequence	Hs.295137	267	NP_001135	NM_001144
206516_PM_at	206516_at	AMH	anti-Mullerian hormone	Exemplar sequence	Hs.112432	268	NP_000470	NM_000479
206892_PM_at	206892_at	AMHR2	anti-Mullerian hormone receptor, type II	Exemplar sequence	Hs.659889	269	NP_001158162 /// NP_001158163 /// NP_065434	NM_001164690 /// NM_001164691 /// NM_020547
228094_PM_at	228094_at	AMICA1	adhesion molecule, interacts with CXADR antigen 1	Consensus sequence	Hs.16291	120425	NP_001091996 /// NP_694938	NM_001098526 /// NM_153206
226718_PM_at	226718_at	AMIGO1	adhesion molecule with Ig-like domain 1	Consensus sequence	Hs.724004	57463	NP_065754	NM_020703
222108_PM_at	222108_at	AMIGO2	adhesion molecule with Ig-like domain 2	Consensus sequence	Hs.121520	347902	NP_001137140 /// NP_862830	NM_001143668 /// NM_181847
229717_PM_at	229717_at	AMIGO3	adhesion molecule with Ig-like domain 3	Consensus sequence	Hs.567903	386724	NP_942015	NM_198722
236760_PM_at	236760_at	AMMECR1	Alport syndrome, mental retardation, midface hypoplasia and elliptocytosis chromosomal region gene 1	Consensus sequence	Hs.656243	9949	NP_001020751 /// NP_001165160 /// NP_056180	NM_001025580 /// NM_001171689 /// NM_015365
1553219_PM_a_at	1553219_a_at	AMMECR1	Alport syndrome, mental retardation, midface hypoplasia and elliptocytosis chromosomal region gene 1	Consensus sequence	Hs.656243	9949	NP_001020751 /// NP_001165160 /// NP_056180	NM_001025580 /// NM_001171689 /// NM_015365
226421_PM_at	226421_at	AMMECR1	Alport syndrome, mental retardation, midface hypoplasia and elliptocytosis chromosomal region gene 1	Consensus sequence	Hs.656243	9949	NP_001020751 /// NP_001165160 /// NP_056180	NM_001025580 /// NM_001171689 /// NM_015365
204976_PM_s_at	204976_s_at	AMMECR1	Alport syndrome, mental retardation, midface hypoplasia and elliptocytosis chromosomal region gene 1	Consensus sequence	Hs.656243	9949	NP_001020751 /// NP_001165160 /// NP_056180	NM_001025580 /// NM_001171689 /// NM_015365
223297_PM_at	223297_at	AMMECR1L	AMME chromosomal region gene 1-like	Exemplar sequence	Hs.546449	83607	NP_113633	NM_031445
223587_PM_s_at	223587_s_at	AMN	amnionless homolog (mouse)	Consensus sequence	Hs.534494	81693	NP_112205	NM_030943
220989_PM_s_at	220989_s_at	AMN	amnionless homolog (mouse)	Exemplar sequence	Hs.534494	81693	NP_112205	NM_030943
226258_PM_at	226258_at	AMN1	antagonist of mitotic exit network 1 homolog (S. cerevisiae)	Consensus sequence	Hs.591146	196394	NP_001106873	NM_001113402 /// NR_004854
209521_PM_s_at	209521_s_at	AMOT	angiomotin	Exemplar sequence	Hs.528051	154796	NP_001106962 /// NP_573572	NM_001113490 /// NM_133265
225459_PM_at	225459_at	AMOTL1	angiomotin like 1	Consensus sequence	Hs.503594	154810	NP_570899	NM_130847
235277_PM_at	235277_at	AMOTL1	angiomotin like 1	Consensus sequence	Hs.503594	154810	NP_570899	NM_130847
228840_PM_at	228840_at	AMOTL1	angiomotin like 1	Consensus sequence	Hs.503594	154810	NP_570899	NM_130847
225450_PM_at	225450_at	AMOTL1	angiomotin like 1	Consensus sequence	Hs.503594	154810	NP_570899	NM_130847
203002_PM_at	203002_at	AMOTL2	angiomotin like 2	Exemplar sequence	Hs.426312	51421	NP_057285	NM_016201
206121_PM_at	206121_at	AMPD1	adenosine monophosphate deaminase 1	Exemplar sequence	Hs.89570	270	NP_000027 /// NP_001166097	NM_000036 /// NM_001172626
212360_PM_at	212360_at	AMPD2	adenosine monophosphate deaminase 2	Consensus sequence	Hs.82927	271	NP_004028 /// NP_631895 /// NP_981949	NM_004037 /// NM_139156 /// NM_203404
209491_PM_s_at	209491_s_at	AMPD3	adenosine monophosphate deaminase 3	Consensus sequence	Hs.501890	272	NP_000471 /// NP_001020560 /// NP_001020561 /// NP_001165901 /// NP_001165902	NM_000480 /// NM_001025389 /// NM_001025390 /// NM_001172430 /// NM_001172431
207992_PM_s_at	207992_s_at	AMPD3	adenosine monophosphate deaminase 3	Exemplar sequence	Hs.501890	272	NP_000471 /// NP_001020560 /// NP_001020561 /// NP_001165901 /// NP_001165902	NM_000480 /// NM_001025389 /// NM_001025390 /// NM_001172430 /// NM_001172431
205257_PM_s_at	205257_s_at	AMPH	amphiphysin	Exemplar sequence	Hs.592182	273	NP_001626 /// NP_647477	NM_001635 /// NM_139316
204294_PM_at	204294_at	AMT	aminomethyltransferase	Exemplar sequence	Hs.102	275	NP_000472 /// NP_001158182 /// NP_001158183 /// NP_001158184	NM_000481 /// NM_001164710 /// NM_001164711 /// NM_001164712 /// NR_028435
208498_PM_s_at	208498_s_at	AMY1A /// AMY1B /// AMY1C /// AMY2A	amylase, alpha 1A (salivary) /// amylase, alpha 1B (salivary) /// amylase, alpha 1C (salivary) /// amylase, alpha 2A (pancreatic)	Exemplar sequence	Hs.654437	276 /// 277 /// 278 /// 279	NP_000690 /// NP_001008219 /// NP_001008220 /// NP_001008222 /// NP_004029	NM_000699 /// NM_001008218 /// NM_001008219 /// NM_001008221 /// NM_004038
228023_PM_x_at	228023_x_at	AMY2B /// RNPC3	amylase, alpha 2B (pancreatic) /// RNA-binding region (RNP1, RRM) containing 3	Consensus sequence	Hs.632423	280 /// 55599	NP_060089 /// NP_066188	NM_017619 /// NM_020978
1561179_PM_s_at	1561179_s_at	AMZ1	archaelysin family metallopeptidase 1	Consensus sequence	Hs.42221	155185	NP_597720	NM_133463
1562261_PM_at	1562261_at	AMZ1	archaelysin family metallopeptidase 1	Consensus sequence	Hs.42221	155185	NP_597720	NM_133463
218167_PM_at	218167_at	AMZ2	archaelysin family metallopeptidase 2	Exemplar sequence	Hs.293560	51321	NP_001028741 /// NP_001028742 /// NP_001028743 /// NP_001028744 /// NP_001028746 /// NP_057711	NM_001033569 /// NM_001033570 /// NM_001033571 /// NM_001033572 /// NM_001033574 /// NM_016627
223443_PM_s_at	223443_s_at	AMZ2P1	archaelysin family metallopeptidase 2 pseudogene 1	Exemplar sequence	Hs.396447	201283	---	NR_026903
218575_PM_at	218575_at	ANAPC1	anaphase promoting complex subunit 1	Exemplar sequence	Hs.436527	64682	NP_073153	NM_022662
229267_PM_at	229267_at	ANAPC1	anaphase promoting complex subunit 1	Consensus sequence	Hs.436527	64682	NP_073153	NM_022662
231973_PM_s_at	231973_s_at	ANAPC1	anaphase promoting complex subunit 1	Consensus sequence	Hs.436527	64682	NP_073153	NM_022662
207845_PM_s_at	207845_s_at	ANAPC10	anaphase promoting complex subunit 10	Exemplar sequence	Hs.480876	10393	NP_055700	NM_014885
241959_PM_at	241959_at	ANAPC10	anaphase promoting complex subunit 10	Consensus sequence	Hs.480876	10393	NP_055700	NM_014885
224010_PM_at	224010_at	ANAPC11	anaphase promoting complex subunit 11	Exemplar sequence	Hs.534456	51529	NP_001002244 /// NP_001002245 /// NP_001002246 /// NP_001002247 /// NP_001002248 /// NP_001002249 /// NP_057560	NM_001002244 /// NM_001002245 /// NM_001002246 /// NM_001002247 /// NM_001002248 /// NM_001002249 /// NM_016476
226414_PM_s_at	226414_s_at	ANAPC11	anaphase promoting complex subunit 11	Consensus sequence	Hs.534456	51529	NP_001002244 /// NP_001002245 /// NP_001002246 /// NP_001002247 /// NP_001002248 /// NP_001002249 /// NP_057560	NM_001002244 /// NM_001002245 /// NM_001002246 /// NM_001002247 /// NM_001002248 /// NM_001002249 /// NM_016476
209001_PM_s_at	209001_s_at	ANAPC13	anaphase promoting complex subunit 13	Exemplar sequence	Hs.106909	25847	NP_056206	NM_015391 /// NR_024400 /// NR_024401
215282_PM_at	215282_at	ANAPC13	anaphase promoting complex subunit 13	Consensus sequence	Hs.106909	25847	NP_056206	NM_015391 /// NR_024400 /// NR_024401
224665_PM_at	224665_at	ANAPC16	anaphase promoting complex subunit 16	Consensus sequence	Hs.426296	119504	NP_775744	NM_173473
229145_PM_at	229145_at	ANAPC16	anaphase promoting complex subunit 16	Consensus sequence	Hs.426296	119504	NP_775744	NM_173473
224664_PM_at	224664_at	ANAPC16	anaphase promoting complex subunit 16	Consensus sequence	Hs.426296	119504	NP_775744	NM_173473
224667_PM_x_at	224667_x_at	ANAPC16	anaphase promoting complex subunit 16	Consensus sequence	Hs.426296	119504	NP_775744	NM_173473
218555_PM_at	218555_at	ANAPC2	anaphase promoting complex subunit 2	Exemplar sequence	Hs.533262	29882	NP_037498	NM_013366
232524_PM_x_at	232524_x_at	ANAPC4	anaphase promoting complex subunit 4	Consensus sequence	Hs.152173	29945	NP_037499	NM_013367
226917_PM_s_at	226917_s_at	ANAPC4	anaphase promoting complex subunit 4	Consensus sequence	Hs.152173	29945	NP_037499	NM_013367
208722_PM_s_at	208722_s_at	ANAPC5	anaphase promoting complex subunit 5	Exemplar sequence	Hs.7101	51433	NP_001131031 /// NP_057321	NM_001137559 /// NM_016237
211036_PM_x_at	211036_x_at	ANAPC5	anaphase promoting complex subunit 5	Exemplar sequence	Hs.7101	51433	NP_001131031 /// NP_057321	NM_001137559 /// NM_016237
208721_PM_s_at	208721_s_at	ANAPC5	anaphase promoting complex subunit 5	Consensus sequence	Hs.7101	51433	NP_001131031 /// NP_057321	NM_001137559 /// NM_016237
239651_PM_at	239651_at	ANAPC5	anaphase promoting complex subunit 5	Consensus sequence	Hs.7101	51433	NP_001131031 /// NP_057321	NM_001137559 /// NM_016237
200098_PM_s_at	200098_s_at	ANAPC5	anaphase promoting complex subunit 5	Consensus sequence	Hs.7101	51433	NP_001131031 /// NP_057321	NM_001137559 /// NM_016237
225521_PM_at	225521_at	ANAPC7	anaphase promoting complex subunit 7	Consensus sequence	Hs.719935	51434	NP_001131136 /// NP_057322	NM_001137664 /// NM_016238
225554_PM_s_at	225554_s_at	ANAPC7	anaphase promoting complex subunit 7	Consensus sequence	Hs.719935	51434	NP_001131136 /// NP_057322	NM_001137664 /// NM_016238
205141_PM_at	205141_at	ANG	angiogenin, ribonuclease, RNase A family, 5	Exemplar sequence	Hs.283749	283	NP_001091046 /// NP_001136	NM_001097577 /// NM_001145
36865_PM_at	36865_at	ANGEL1	angel homolog 1 (Drosophila)	Consensus sequence	Hs.497448	23357	NP_056120	NM_015305
213099_PM_at	213099_at	ANGEL1	angel homolog 1 (Drosophila)	Consensus sequence	Hs.497448	23357	NP_056120	NM_015305
244685_PM_at	244685_at	ANGEL1	Angel homolog 1 (Drosophila)	Consensus sequence	Hs.497448	23357	NP_056120	NM_015305
221826_PM_at	221826_at	ANGEL2	angel homolog 2 (Drosophila)	Consensus sequence	Hs.157078	90806	NP_653168	NM_144567
221825_PM_at	221825_at	ANGEL2	angel homolog 2 (Drosophila)	Consensus sequence	Hs.157078	90806	NP_653168	NM_144567
217630_PM_at	217630_at	ANGEL2	angel homolog 2 (Drosophila)	Consensus sequence	Hs.157078	90806	NP_653168	NM_144567
205609_PM_at	205609_at	ANGPT1	angiopoietin 1	Exemplar sequence	Hs.369675	284	NP_001137	NM_001146
205608_PM_s_at	205608_s_at	ANGPT1	angiopoietin 1	Exemplar sequence	Hs.369675	284	NP_001137	NM_001146
1552939_PM_at	1552939_at	ANGPT1	angiopoietin 1	Consensus sequence	Hs.369675	284	NP_001137	NM_001146
237261_PM_at	237261_at	ANGPT2	angiopoietin 2	Consensus sequence	Hs.583870	285	NP_001112359 /// NP_001112360 /// NP_001138	NM_001118887 /// NM_001118888 /// NM_001147
236034_PM_at	236034_at	ANGPT2	angiopoietin 2	Consensus sequence	Hs.583870	285	NP_001112359 /// NP_001112360 /// NP_001138	NM_001118887 /// NM_001118888 /// NM_001147
205572_PM_at	205572_at	ANGPT2	angiopoietin 2	Exemplar sequence	Hs.583870	285	NP_001112359 /// NP_001112360 /// NP_001138	NM_001118887 /// NM_001118888 /// NM_001147
211148_PM_s_at	211148_s_at	ANGPT2	angiopoietin 2	Exemplar sequence	Hs.583870	285	NP_001112359 /// NP_001112360 /// NP_001138	NM_001118887 /// NM_001118888 /// NM_001147
221134_PM_at	221134_at	ANGPT4	angiopoietin 4	Exemplar sequence	Hs.278973	51378	NP_057069	NM_015985
239183_PM_at	239183_at	ANGPTL1	angiopoietin-like 1	Consensus sequence	Hs.591474	9068	NP_004664	NM_004673
224339_PM_s_at	224339_s_at	ANGPTL1	angiopoietin-like 1	Exemplar sequence	Hs.591474	9068	NP_004664	NM_004673
231773_PM_at	231773_at	ANGPTL1	angiopoietin-like 1	Consensus sequence	Hs.591474	9068	NP_004664	NM_004673
213001_PM_at	213001_at	ANGPTL2	angiopoietin-like 2	Consensus sequence	Hs.653262	23452	NP_036230	NM_012098
219514_PM_at	219514_at	ANGPTL2	angiopoietin-like 2	Exemplar sequence	Hs.653262	23452	NP_036230	NM_012098
213004_PM_at	213004_at	ANGPTL2	angiopoietin-like 2	Consensus sequence	Hs.653262	23452	NP_036230	NM_012098
243799_PM_x_at	243799_x_at	ANGPTL3	angiopoietin-like 3	Consensus sequence	Hs.209153	27329	NP_055310	NM_014495
231684_PM_at	231684_at	ANGPTL3	Angiopoietin-like 3	Consensus sequence	Hs.209153	27329	NP_055310	NM_014495
219803_PM_at	219803_at	ANGPTL3	angiopoietin-like 3	Exemplar sequence	Hs.209153	27329	NP_055310	NM_014495
223333_PM_s_at	223333_s_at	ANGPTL4	angiopoietin-like 4	Exemplar sequence	Hs.9613	51129	NP_001034756 /// NP_647475	NM_001039667 /// NM_139314
221009_PM_s_at	221009_s_at	ANGPTL4	angiopoietin-like 4	Exemplar sequence	Hs.9613	51129	NP_001034756 /// NP_647475	NM_001039667 /// NM_139314
223967_PM_at	223967_at	ANGPTL6	angiopoietin-like 6	Exemplar sequence	Hs.712850	83854	NP_114123	NM_031917
206423_PM_at	206423_at	ANGPTL7	angiopoietin-like 7	Exemplar sequence	Hs.146559	10218	NP_066969	NM_021146
208353_PM_x_at	208353_x_at	ANK1	ankyrin 1, erythrocytic	Exemplar sequence	Hs.654438	286	NP_000028 /// NP_001135917 /// NP_001135918 /// NP_065208 /// NP_065209 /// NP_065210 /// NP_065211 /// NP_065213	NM_000037 /// NM_001142445 /// NM_001142446 /// NM_020475 /// NM_020476 /// NM_020477 /// NM_020478 /// NM_020480
208352_PM_x_at	208352_x_at	ANK1	ankyrin 1, erythrocytic	Exemplar sequence	Hs.654438	286	NP_000028 /// NP_001135917 /// NP_001135918 /// NP_065208 /// NP_065209 /// NP_065210 /// NP_065211 /// NP_065213	NM_000037 /// NM_001142445 /// NM_001142446 /// NM_020475 /// NM_020476 /// NM_020477 /// NM_020478 /// NM_020480
205389_PM_s_at	205389_s_at	ANK1	ankyrin 1, erythrocytic	Consensus sequence	Hs.654438	286	NP_000028 /// NP_001135917 /// NP_001135918 /// NP_065208 /// NP_065209 /// NP_065210 /// NP_065211 /// NP_065213	NM_000037 /// NM_001142445 /// NM_001142446 /// NM_020475 /// NM_020476 /// NM_020477 /// NM_020478 /// NM_020480
240363_PM_at	240363_at	ANK1	ankyrin 1, erythrocytic	Consensus sequence	Hs.654438	286	NP_000028 /// NP_001135917 /// NP_001135918 /// NP_065208 /// NP_065209 /// NP_065210 /// NP_065211 /// NP_065213	NM_000037 /// NM_001142445 /// NM_001142446 /// NM_020475 /// NM_020476 /// NM_020477 /// NM_020478 /// NM_020480
205390_PM_s_at	205390_s_at	ANK1	ankyrin 1, erythrocytic	Exemplar sequence	Hs.654438	286	NP_000028 /// NP_001135917 /// NP_001135918 /// NP_065208 /// NP_065209 /// NP_065210 /// NP_065211 /// NP_065213	NM_000037 /// NM_001142445 /// NM_001142446 /// NM_020475 /// NM_020476 /// NM_020477 /// NM_020478 /// NM_020480
205391_PM_x_at	205391_x_at	ANK1	ankyrin 1, erythrocytic	Exemplar sequence	Hs.654438	286	NP_000028 /// NP_001135917 /// NP_001135918 /// NP_065208 /// NP_065209 /// NP_065210 /// NP_065211 /// NP_065213	NM_000037 /// NM_001142445 /// NM_001142446 /// NM_020475 /// NM_020476 /// NM_020477 /// NM_020478 /// NM_020480
207087_PM_x_at	207087_x_at	ANK1	ankyrin 1, erythrocytic	Exemplar sequence	Hs.654438	286	NP_000028 /// NP_001135917 /// NP_001135918 /// NP_065208 /// NP_065209 /// NP_065210 /// NP_065211 /// NP_065213	NM_000037 /// NM_001142445 /// NM_001142446 /// NM_020475 /// NM_020476 /// NM_020477 /// NM_020478 /// NM_020480
232606_PM_at	232606_at	ANK2	Ankyrin 2, neuronal	Consensus sequence	Hs.620557	287	NP_001120965 /// NP_001139 /// NP_066187	NM_001127493 /// NM_001148 /// NM_020977
202920_PM_at	202920_at	ANK2	ankyrin 2, neuronal	Consensus sequence	Hs.620557	287	NP_001120965 /// NP_001139 /// NP_066187	NM_001127493 /// NM_001148 /// NM_020977
202921_PM_s_at	202921_s_at	ANK2	ankyrin 2, neuronal	Exemplar sequence	Hs.620557	287	NP_001120965 /// NP_001139 /// NP_066187	NM_001127493 /// NM_001148 /// NM_020977
216195_PM_at	216195_at	ANK2	Ankyrin 2, neuronal	Consensus sequence	Hs.620557	287	NP_001120965 /// NP_001139 /// NP_066187	NM_001127493 /// NM_001148 /// NM_020977
209442_PM_x_at	209442_x_at	ANK3	ankyrin 3, node of Ranvier (ankyrin G)	Exemplar sequence	Hs.499725	288	NP_001140 /// NP_066267	NM_001149 /// NM_020987
207950_PM_s_at	207950_s_at	ANK3	ankyrin 3, node of Ranvier (ankyrin G)	Exemplar sequence	Hs.499725	288	NP_001140 /// NP_066267	NM_001149 /// NM_020987
206385_PM_s_at	206385_s_at	ANK3	ankyrin 3, node of Ranvier (ankyrin G)	Exemplar sequence	Hs.499725	288	NP_001140 /// NP_066267	NM_001149 /// NM_020987
1552438_PM_a_at	1552438_a_at	ANKAR	ankyrin and armadillo repeat containing	Consensus sequence	Hs.655700	150709	NP_653309	NM_144708
1556653_PM_at	1556653_at	ANKAR	ankyrin and armadillo repeat containing	Consensus sequence	Hs.60772	150709	NP_653309	NM_144708
229497_PM_at	229497_at	ANKDD1A	ankyrin repeat and death domain containing 1A	Consensus sequence	Hs.207157	348094	NP_874362	NM_182703
237316_PM_at	237316_at	ANKDD1A	ankyrin repeat and death domain containing 1A	Consensus sequence	Hs.207157	348094	NP_874362	NM_182703
1553211_PM_at	1553211_at	ANKFN1	ankyrin-repeat and fibronectin type III domain containing 1	Consensus sequence	Hs.673040	162282	NP_694960	NM_153228
1559640_PM_at	1559640_at	ANKFN1	Ankyrin-repeat and fibronectin type III domain containing 1	Consensus sequence	Hs.673040	162282	NP_694960	NM_153228
224900_PM_at	224900_at	ANKFY1	ankyrin repeat and FYVE domain containing 1	Consensus sequence	Hs.696087	51479	NP_057460 /// NP_065791	NM_016376 /// NM_020740
239073_PM_at	239073_at	ANKFY1	ankyrin repeat and FYVE domain containing 1	Consensus sequence	Hs.696087	51479	NP_057460 /// NP_065791	NM_016376 /// NM_020740
1562495_PM_at	1562495_at	ANKFY1	Ankyrin repeat and FYVE domain containing 1	Consensus sequence	Hs.696087	51479	NP_057460 /// NP_065791	NM_016376 /// NM_020740
219868_PM_s_at	219868_s_at	ANKFY1	ankyrin repeat and FYVE domain containing 1	Exemplar sequence	Hs.696087	51479	NP_057460 /// NP_065791	NM_016376 /// NM_020740
1560369_PM_at	1560369_at	ANKH	Ankylosis, progressive homolog (mouse)	Consensus sequence	Hs.156727	56172	NP_473368	NM_054027
223092_PM_at	223092_at	ANKH	ankylosis, progressive homolog (mouse)	Consensus sequence	Hs.156727	56172	NP_473368	NM_054027
223093_PM_at	223093_at	ANKH	ankylosis, progressive homolog (mouse)	Consensus sequence	Hs.156727	56172	NP_473368	NM_054027
223094_PM_s_at	223094_s_at	ANKH	ankylosis, progressive homolog (mouse)	Exemplar sequence	Hs.156727	56172	NP_473368	NM_054027
229176_PM_at	229176_at	ANKH	ankylosis, progressive homolog (mouse)	Consensus sequence	Hs.156727	56172	NP_473368	NM_054027
1560370_PM_x_at	1560370_x_at	ANKH	Ankylosis, progressive homolog (mouse)	Consensus sequence	Hs.156727	56172	NP_473368	NM_054027
220076_PM_at	220076_at	ANKH	ankylosis, progressive homolog (mouse)	Exemplar sequence	Hs.156727	56172	NP_473368	NM_054027
219081_PM_at	219081_at	ANKHD1	ankyrin repeat and KH domain containing 1	Exemplar sequence	Hs.594084	54882	NP_060217 /// NP_060448 /// NP_078944	NM_017747 /// NM_017978 /// NM_024668
229457_PM_at	229457_at	ANKHD1	ankyrin repeat and KH domain containing 1	Consensus sequence	Hs.594084	54882	NP_060217 /// NP_060448 /// NP_078944	NM_017747 /// NM_017978 /// NM_024668
233292_PM_s_at	233292_s_at	ANKHD1 /// ANKHD1-EIF4EBP3	ankyrin repeat and KH domain containing 1 /// ANKHD1-EIF4EBP3 readthrough	Consensus sequence	Hs.594084	404734 /// 54882	NP_060217 /// NP_060448 /// NP_065741 /// NP_078944	NM_017747 /// NM_017978 /// NM_020690 /// NM_024668
208773_PM_s_at	208773_s_at	ANKHD1 /// ANKHD1-EIF4EBP3	ankyrin repeat and KH domain containing 1 /// ANKHD1-EIF4EBP3 readthrough	Exemplar sequence	Hs.594084	404734 /// 54882	NP_060217 /// NP_060448 /// NP_065741 /// NP_078944	NM_017747 /// NM_017978 /// NM_020690 /// NM_024668
208772_PM_at	208772_at	ANKHD1 /// ANKHD1-EIF4EBP3	ankyrin repeat and KH domain containing 1 /// ANKHD1-EIF4EBP3 readthrough	Consensus sequence	Hs.594084	404734 /// 54882	NP_060217 /// NP_060448 /// NP_065741 /// NP_078944	NM_017747 /// NM_017978 /// NM_020690 /// NM_024668
214919_PM_s_at	214919_s_at	ANKHD1-EIF4EBP3 /// EIF4EBP3	ANKHD1-EIF4EBP3 readthrough /// eukaryotic translation initiation factor 4E binding protein 3	Consensus sequence	---	404734 /// 8637	NP_003723 /// NP_065741	NM_003732 /// NM_020690
243181_PM_at	243181_at	ANKIB1	ankyrin repeat and IBR domain containing 1	Consensus sequence	Hs.83293	54467	NP_061877	NM_019004
224687_PM_at	224687_at	ANKIB1	ankyrin repeat and IBR domain containing 1	Consensus sequence	Hs.83293	54467	NP_061877	NM_019004
224682_PM_at	224682_at	ANKIB1	ankyrin repeat and IBR domain containing 1	Consensus sequence	Hs.83293	54467	NP_061877	NM_019004
1553138_PM_a_at	1553138_a_at	ANKLE1	ankyrin repeat and LEM domain containing 1	Consensus sequence	Hs.721610	126549	NP_689576	NM_152363
213962_PM_s_at	213962_s_at	ANKLE2	Ankyrin repeat and LEM domain containing 2	Consensus sequence	Hs.654628	23141	NP_055929	NM_015114
212200_PM_at	212200_at	ANKLE2	ankyrin repeat and LEM domain containing 2	Consensus sequence	Hs.654628	23141	NP_055929	NM_015114
212201_PM_at	212201_at	ANKLE2	ankyrin repeat and LEM domain containing 2	Consensus sequence	Hs.654628	23141	NP_055929	NM_015114
220280_PM_s_at	220280_s_at	ANKMY1	ankyrin repeat and MYND domain containing 1	Exemplar sequence	Hs.656615	51281	NP_057636 /// NP_060314	NM_016552 /// NM_017844
210486_PM_at	210486_at	ANKMY1	ankyrin repeat and MYND domain containing 1	Exemplar sequence	Hs.656615	51281	NP_057636 /// NP_060314	NM_016552 /// NM_017844
1554610_PM_at	1554610_at	ANKMY1	ankyrin repeat and MYND domain containing 1	Consensus sequence	Hs.656615	51281	NP_057636 /// NP_060314	NM_016552 /// NM_017844
212798_PM_s_at	212798_s_at	ANKMY2	ankyrin repeat and MYND domain containing 2	Consensus sequence	Hs.157378	57037	NP_064715	NM_020319
218769_PM_s_at	218769_s_at	ANKRA2	ankyrin repeat, family A (RFXANK-like), 2	Exemplar sequence	Hs.239154	57763	NP_075526	NM_023039
206029_PM_at	206029_at	ANKRD1	ankyrin repeat domain 1 (cardiac muscle)	Exemplar sequence	Hs.448589	27063	NP_055206	NM_014391
226663_PM_at	226663_at	ANKRD10	ankyrin repeat domain 10	Consensus sequence	Hs.525163	55608	NP_060134	NM_017664
223251_PM_s_at	223251_s_at	ANKRD10	ankyrin repeat domain 10	Exemplar sequence	Hs.525163	55608	NP_060134	NM_017664
218093_PM_s_at	218093_s_at	ANKRD10	ankyrin repeat domain 10	Exemplar sequence	Hs.525163	55608	NP_060134	NM_017664
241414_PM_at	241414_at	ANKRD10	ankyrin repeat domain 10	Consensus sequence	Hs.525163	55608	NP_060134	NM_017664
239116_PM_at	239116_at	ANKRD10	Ankyrin repeat domain 10	Consensus sequence	Hs.525163	55608	NP_060134	NM_017664
227260_PM_at	227260_at	ANKRD10	Ankyrin repeat domain 10	Consensus sequence	Hs.525163	55608	NP_060134	NM_017664
227661_PM_at	227661_at	ANKRD11	Ankyrin repeat domain 11	Consensus sequence	Hs.335003	29123	NP_037407	NM_013275
228356_PM_at	228356_at	ANKRD11	ankyrin repeat domain 11	Consensus sequence	Hs.335003	29123	NP_037407	NM_013275
234701_PM_at	234701_at	ANKRD11	ankyrin repeat domain 11	Consensus sequence	Hs.335003	29123	NP_037407	NM_013275
231999_PM_at	231999_at	ANKRD11	ankyrin repeat domain 11	Consensus sequence	Hs.335003	29123	NP_037407	NM_013275
219437_PM_s_at	219437_s_at	ANKRD11	ankyrin repeat domain 11	Exemplar sequence	Hs.335003	29123	NP_037407	NM_013275
226012_PM_at	226012_at	ANKRD11	ankyrin repeat domain 11	Consensus sequence	Hs.335003	29123	NP_037407	NM_013275
238538_PM_at	238538_at	ANKRD11	ankyrin repeat domain 11	Consensus sequence	Hs.335003	29123	NP_037407	NM_013275
212289_PM_at	212289_at	ANKRD12	ankyrin repeat domain 12	Consensus sequence	Hs.464585	23253	NP_001077094 /// NP_056023	NM_001083625 /// NM_015208
216563_PM_at	216563_at	ANKRD12	Ankyrin repeat domain 12	Consensus sequence	Hs.464585	23253	NP_001077094 /// NP_056023	NM_001083625 /// NM_015208
216550_PM_x_at	216550_x_at	ANKRD12	ankyrin repeat domain 12	Consensus sequence	Hs.464585	23253	NP_001077094 /// NP_056023	NM_001083625 /// NM_015208
212286_PM_at	212286_at	ANKRD12	ankyrin repeat domain 12	Consensus sequence	Hs.464585	23253	NP_001077094 /// NP_056023	NM_001083625 /// NM_015208
224810_PM_s_at	224810_s_at	ANKRD13A	ankyrin repeat domain 13A	Consensus sequence	Hs.528703	88455	NP_149112	NM_033121
238851_PM_at	238851_at	ANKRD13A	ankyrin repeat domain 13A	Consensus sequence	Hs.528703	88455	NP_149112	NM_033121
227720_PM_at	227720_at	ANKRD13B	ankyrin repeat domain 13B	Consensus sequence	Hs.662164	124930	NP_689558	NM_152345
1554471_PM_a_at	1554471_a_at	ANKRD13C	ankyrin repeat domain 13C	Consensus sequence	Hs.723935	81573	NP_110443	NM_030816
227375_PM_at	227375_at	ANKRD13C	ankyrin repeat domain 13C	Consensus sequence	Hs.723935	81573	NP_110443	NM_030816
223418_PM_x_at	223418_x_at	ANKRD13C	ankyrin repeat domain 13C	Exemplar sequence	Hs.723935	81573	NP_110443	NM_030816
1556361_PM_s_at	1556361_s_at	ANKRD13C	ankyrin repeat domain 13C	Consensus sequence	Hs.723935	81573	NP_110443	NM_030816
238597_PM_at	238597_at	ANKRD13C	ankyrin repeat domain 13C	Consensus sequence	Hs.723935	81573	NP_110443	NM_030816
244756_PM_at	244756_at	ANKRD13D	ankyrin repeat domain 13 family, member D	Consensus sequence	Hs.438673	338692	NP_997237	NM_207354 /// NR_030767
226205_PM_at	226205_at	ANKRD13D	ankyrin repeat domain 13 family, member D	Consensus sequence	Hs.438673	338692	NP_997237	NM_207354 /// NR_030767
238642_PM_at	238642_at	ANKRD13D	ankyrin repeat domain 13 family, member D	Consensus sequence	Hs.438673	338692	NP_997237	NM_207354 /// NR_030767
229058_PM_at	229058_at	ANKRD16	ankyrin repeat domain 16	Consensus sequence	Hs.289828	54522	NP_001009941 /// NP_001009942 /// NP_001009943 /// NP_061919	NM_001009941 /// NM_001009942 /// NM_001009943 /// NM_019046
231423_PM_s_at	231423_s_at	ANKRD16	ankyrin repeat domain 16	Consensus sequence	Hs.289828	54522	NP_001009941 /// NP_001009942 /// NP_001009943 /// NP_061919	NM_001009941 /// NM_001009942 /// NM_001009943 /// NM_019046
212211_PM_at	212211_at	ANKRD17	ankyrin repeat domain 17	Consensus sequence	Hs.724400	26057	NP_115593 /// NP_942592	NM_032217 /// NM_198889
225852_PM_at	225852_at	ANKRD17	ankyrin repeat domain 17	Consensus sequence	Hs.724400	26057	NP_115593 /// NP_942592	NM_032217 /// NM_198889
1559406_PM_at	1559406_at	ANKRD18A	ankyrin repeat domain 18A	Consensus sequence	Hs.644630	253650	NP_671728 /// XP_001714022 /// XP_001717672 /// XP_001726157	NM_147195 /// XM_001713970 /// XM_001717620 /// XM_001726105
242045_PM_at	242045_at	ANKRD18A	Ankyrin repeat domain 18A	Consensus sequence	Hs.679081	253650	NP_671728 /// XP_001714022 /// XP_001717672 /// XP_001726157	NM_147195 /// XM_001713970 /// XM_001717620 /// XM_001726105
233592_PM_at	233592_at	ANKRD18A /// ANKRD18B	ankyrin repeat domain 18A /// ankyrin repeat domain 18B	Consensus sequence	Hs.493710	253650 /// 441459	NP_671728 /// XP_001714022 /// XP_001716377 /// XP_001717249 /// XP_001717672 /// XP_001718386 /// XP_001726157	NM_147195 /// XM_001713970 /// XM_001716325 /// XM_001717197 /// XM_001717620 /// XM_001718334 /// XM_001726105
244297_PM_at	244297_at	ANKRD18A /// LOC100288689 /// LOC100289137 /// LOC100290097	ankyrin repeat domain 18A /// similar to hCG2010820 /// similar to hCG2010820 /// similar to hCG2010820	Consensus sequence	Hs.722216	100288689 /// 100289137 /// 100290097 /// 253650	NP_671728 /// XP_001714022 /// XP_001717672 /// XP_001726157	NM_147195 /// XM_001713970 /// XM_001717620 /// XM_001726105 /// XR_078395 /// XR_078397 /// XR_079061 /// XR_079247 /// XR_079249
232926_PM_x_at	232926_x_at	ANKRD19	ankyrin repeat domain 19 pseudogene	Consensus sequence	Hs.643597	138649	---	NR_026868
221232_PM_s_at	221232_s_at	ANKRD2	ankyrin repeat domain 2 (stretch responsive muscle)	Exemplar sequence	Hs.73708	26287	NP_001123453 /// NP_065082	NM_001129981 /// NM_020349
224012_PM_at	224012_at	ANKRD20A1 /// ANKRD20A2 /// ANKRD20A3	ankyrin repeat domain 20 family, member A1 /// ankyrin repeat domain 20 family, member A2 /// ankyrin repeat domain 20 family, member A3	Exemplar sequence	Hs.632663	441425 /// 441430 /// 84210	NP_001012419 /// NP_001012421 /// NP_115626	NM_001012419 /// NM_001012421 /// NM_032250
1569607_PM_s_at	1569607_s_at	ANKRD20A1 /// ANKRD20A2 /// ANKRD20A3 /// ANKRD20A4 /// ANKRD20A5 /// C21orf81 /// LOC100132733 /// LOC644339	ankyrin repeat domain 20 family, member A1 /// ankyrin repeat domain 20 family, member A2 /// ankyrin repeat domain 20 family, member A3 /// ankyrin repeat domain 20 family, member A4 /// ankyrin repeat domain 20 family, member A5 /// ankyrin repeat domain 20 family, member A3 pseudogene /// similar to FLJ00310 protein /// similar to ANKRD20A2 protein	Consensus sequence	Hs.633153	100132733 /// 391267 /// 440482 /// 441425 /// 441430 /// 644339 /// 728747 /// 84210	NP_001012419 /// NP_001012421 /// NP_001092275 /// NP_115626 /// XP_001715394 /// XP_002345143 /// XP_002346697 /// XP_002347882	NM_001012419 /// NM_001012421 /// NM_001098805 /// NM_032250 /// NR_027270 /// XM_001715342 /// XM_002345102 /// XM_002346656 /// XM_002347841 /// XR_016677 /// XR_038304 /// XR_079251
1570255_PM_s_at	1570255_s_at	ANKRD20A1 /// ANKRD20A2 /// ANKRD20A3 /// ANKRD20A4 /// ANKRD20B /// LOC375010	ankyrin repeat domain 20 family, member A1 /// ankyrin repeat domain 20 family, member A2 /// ankyrin repeat domain 20 family, member A3 /// ankyrin repeat domain 20 family, member A4 /// ankyrin repeat domain 20B /// ankyrin repeat domain 20 family, member A pseudogene	Consensus sequence	Hs.632663	375010 /// 441425 /// 441430 /// 728747 /// 729171 /// 84210	NP_001012419 /// NP_001012421 /// NP_001092275 /// NP_115626	NM_001012419 /// NM_001012421 /// NM_001098805 /// NM_032250 /// NR_003366 /// XR_041271 /// XR_079090
238439_PM_at	238439_at	ANKRD22	ankyrin repeat domain 22	Consensus sequence	Hs.217484	118932	NP_653191	NM_144590
239196_PM_at	239196_at	ANKRD22	ankyrin repeat domain 22	Consensus sequence	Hs.217484	118932	NP_653191	NM_144590
229052_PM_at	229052_at	ANKRD23 /// ANKRD39	ankyrin repeat domain 23 /// ankyrin repeat domain 39	Consensus sequence	Hs.643430	200539 /// 51239	NP_057550 /// NP_659431	NM_016466 /// NM_144994
1553366_PM_s_at	1553366_s_at	ANKRD23 /// ANKRD39	ankyrin repeat domain 23 /// ankyrin repeat domain 39	Consensus sequence	Hs.643430	200539 /// 51239	NP_057550 /// NP_659431	NM_016466 /// NM_144994
233895_PM_at	233895_at	ANKRD24	ankyrin repeat domain 24	Consensus sequence	Hs.197872	170961	NP_597732	NM_133475
1558400_PM_x_at	1558400_x_at	ANKRD24	ankyrin repeat domain 24	Consensus sequence	Hs.197872	170961	NP_597732	NM_133475
1558398_PM_at	1558398_at	ANKRD24	ankyrin repeat domain 24	Consensus sequence	Hs.197872	170961	NP_597732	NM_133475
205706_PM_s_at	205706_s_at	ANKRD26	ankyrin repeat domain 26	Exemplar sequence	Hs.361041	22852	NP_055730	NM_014915
205705_PM_at	205705_at	ANKRD26	ankyrin repeat domain 26	Consensus sequence	Hs.361041	22852	NP_055730	NM_014915
221522_PM_at	221522_at	ANKRD27	ankyrin repeat domain 27 (VPS9 domain)	Exemplar sequence	Hs.59236	84079	NP_115515	NM_032139
226025_PM_at	226025_at	ANKRD28	ankyrin repeat domain 28	Consensus sequence	Hs.335239	23243	NP_056014	NM_015199
213035_PM_at	213035_at	ANKRD28	ankyrin repeat domain 28	Consensus sequence	Hs.335239	23243	NP_056014	NM_015199
1561079_PM_at	1561079_at	ANKRD28	ankyrin repeat domain 28	Consensus sequence	Hs.335239	23243	NP_056014	NM_015199
238332_PM_at	238332_at	ANKRD29	ankyrin repeat domain 29	Consensus sequence	Hs.374774	147463	NP_775776	NM_173505
229308_PM_at	229308_at	ANKRD29	ankyrin repeat domain 29	Consensus sequence	Hs.374774	147463	NP_775776	NM_173505
223864_PM_at	223864_at	ANKRD30A	ankyrin repeat domain 30A	Exemplar sequence	Hs.373787	91074	NP_443723	NM_052997
1562292_PM_at	1562292_at	ANKRD30B	ankyrin repeat domain 30B	Consensus sequence	Hs.567889	374860	NP_001138501	NM_001145029
1562294_PM_x_at	1562294_x_at	ANKRD30B	ankyrin repeat domain 30B	Consensus sequence	Hs.567889	374860	NP_001138501	NM_001145029
1564000_PM_at	1564000_at	ANKRD31	ankyrin repeat domain 31	Consensus sequence	Hs.482533	256006	NP_001157915 /// XP_001714521 /// XP_932764 /// XP_942490	NM_001164443 /// XM_001714469 /// XM_927671 /// XM_937397
223542_PM_at	223542_at	ANKRD32	ankyrin repeat domain 32	Exemplar sequence	Hs.657315	84250	NP_115666	NM_032290
1558076_PM_at	1558076_at	ANKRD32	ankyrin repeat domain 32	Consensus sequence	Hs.657315	84250	NP_115666	NM_032290
242209_PM_at	242209_at	ANKRD33	ankyrin repeat domain 33	Consensus sequence	Hs.433492	341405	NP_001123487 /// NP_872414	NM_001130015 /// NM_182608
231963_PM_at	231963_at	ANKRD33B	ankyrin repeat domain 33B	Consensus sequence	Hs.26039	651746	NP_001157912 /// XP_001130634 /// XP_001723826 /// XP_946054	NM_001164440 /// XM_001130634 /// XM_001723774 /// XM_940961
232735_PM_at	232735_at	ANKRD34A	ankyrin repeat domain 34A	Consensus sequence	Hs.620591	284615	NP_001034977	NM_001039888
216073_PM_at	216073_at	ANKRD34C	ankyrin repeat domain 34C	Consensus sequence	Hs.531231	390616	NP_001139813 /// XP_002343368 /// XP_002344905 /// XP_002347592	NM_001146341 /// XM_002343327 /// XM_002344864 /// XM_002347551
231118_PM_at	231118_at	ANKRD35	ankyrin repeat domain 35	Consensus sequence	Hs.710624	148741	NP_653299	NM_144698
214723_PM_x_at	214723_x_at	ANKRD36	ankyrin repeat domain 36	Consensus sequence	Hs.541894	375248	NP_001157787 /// XP_002342272 /// XP_002345594 /// XP_002348322	NM_001164315 /// XM_002342231 /// XM_002345553 /// XM_002348281
220940_PM_at	220940_at	ANKRD36B	ankyrin repeat domain 36B	Exemplar sequence	Hs.532921	57730	NP_079466	NM_025190
227337_PM_at	227337_at	ANKRD37	ankyrin repeat domain 37	Consensus sequence	Hs.508154	353322	NP_859077	NM_181726
242548_PM_x_at	242548_x_at	ANKRD37	ankyrin repeat domain 37	Consensus sequence	Hs.508154	353322	NP_859077	NM_181726
223532_PM_at	223532_at	ANKRD39	ankyrin repeat domain 39	Exemplar sequence	Hs.709507	51239	NP_057550	NM_016466
241032_PM_at	241032_at	ANKRD40	Ankyrin repeat domain 40	Consensus sequence	Hs.463426	91369	NP_443087	NM_052855
227064_PM_at	227064_at	ANKRD40	ankyrin repeat domain 40	Consensus sequence	Hs.463426	91369	NP_443087	NM_052855
211717_PM_at	211717_at	ANKRD40	ankyrin repeat domain 40	Exemplar sequence	Hs.463426	91369	NP_443087	NM_052855
243151_PM_at	243151_at	ANKRD42	Ankyrin repeat domain 42	Consensus sequence	Hs.503438	338699	NP_872409	NM_182603
230238_PM_at	230238_at	ANKRD43	ankyrin repeat domain 43	Consensus sequence	Hs.13308	134548	NP_787069	NM_175873
235778_PM_s_at	235778_s_at	ANKRD44	ankyrin repeat domain 44	Consensus sequence	Hs.654819	91526	NP_710181	NM_153697
228471_PM_at	228471_at	ANKRD44	ankyrin repeat domain 44	Consensus sequence	Hs.654819	91526	NP_710181	NM_153697
235777_PM_at	235777_at	ANKRD44	ankyrin repeat domain 44	Consensus sequence	Hs.654819	91526	NP_710181	NM_153697
233361_PM_at	233361_at	ANKRD44	ankyrin repeat domain 44	Consensus sequence	Hs.654819	91526	NP_710181	NM_153697
236421_PM_at	236421_at	ANKRD45	ankyrin repeat domain 45	Consensus sequence	Hs.130054	339416	NP_940895	NM_198493
212731_PM_at	212731_at	ANKRD46	ankyrin repeat domain 46	Consensus sequence	Hs.530199	157567	NP_940683	NM_198401
219069_PM_at	219069_at	ANKRD49	ankyrin repeat domain 49	Exemplar sequence	Hs.29052	54851	NP_060174	NM_017704
220144_PM_s_at	220144_s_at	ANKRD5	ankyrin repeat domain 5	Exemplar sequence	Hs.70903	63926	NP_071379 /// NP_942093	NM_022096 /// NM_198798
222951_PM_s_at	222951_s_at	ANKRD5	ankyrin repeat domain 5	Consensus sequence	Hs.70903	63926	NP_071379 /// NP_942093	NM_022096 /// NM_198798
225731_PM_at	225731_at	ANKRD50	ankyrin repeat domain 50	Consensus sequence	Hs.480694	57182	NP_001161354 /// NP_065070	NM_001167882 /// NM_020337
225735_PM_at	225735_at	ANKRD50	ankyrin repeat domain 50	Consensus sequence	Hs.480694	57182	NP_001161354 /// NP_065070	NM_001167882 /// NM_020337
236189_PM_at	236189_at	ANKRD50	ankyrin repeat domain 50	Consensus sequence	Hs.480694	57182	NP_001161354 /// NP_065070	NM_001167882 /// NM_020337
228257_PM_at	228257_at	ANKRD52	ankyrin repeat domain 52	Consensus sequence	Hs.524506	283373	NP_775866	NM_173595
215759_PM_at	215759_at	ANKRD53	ankyrin repeat domain 53	Consensus sequence	Hs.512744	79998	NP_001108588 /// NP_079209	NM_001115116 /// NM_024933
244453_PM_at	244453_at	ANKRD53	ankyrin repeat domain 53	Consensus sequence	Hs.512744	79998	NP_001108588 /// NP_079209	NM_001115116 /// NM_024933
231847_PM_at	231847_at	ANKRD54	ankyrin repeat domain 54	Consensus sequence	Hs.135259	129138	NP_620152	NM_138797
220112_PM_at	220112_at	ANKRD55	ankyrin repeat domain 55	Exemplar sequence	Hs.436214	79722	NP_001035024 /// NP_078945	NM_001039935 /// NM_024669
240456_PM_at	240456_at	ANKRD55	Ankyrin repeat domain 55	Consensus sequence	Hs.436214	79722	NP_001035024 /// NP_078945	NM_001039935 /// NM_024669
227034_PM_at	227034_at	ANKRD57	ankyrin repeat domain 57	Consensus sequence	Hs.355455	65124	NP_075392	NM_023016
219496_PM_at	219496_at	ANKRD57	ankyrin repeat domain 57	Exemplar sequence	Hs.355455	65124	NP_075392	NM_023016
204672_PM_s_at	204672_s_at	ANKRD6	ankyrin repeat domain 6	Exemplar sequence	Hs.702213	22881	NP_055757	NM_014942
204671_PM_s_at	204671_s_at	ANKRD6	ankyrin repeat domain 6	Consensus sequence	Hs.702213	22881	NP_055757	NM_014942
234511_PM_at	234511_at	ANKRD60	ankyrin repeat domain 60	Consensus sequence	---	140731	XP_001134442 /// XP_001134462 /// XP_001717391	XM_001134442 /// XM_001134462 /// XM_001717339
206112_PM_at	206112_at	ANKRD7	ankyrin repeat domain 7	Exemplar sequence	---	56311	NP_001071176 /// NP_062618	NM_001077708 /// NM_019644
244245_PM_at	244245_at	ANKRD9	Ankyrin repeat domain 9	Consensus sequence	Hs.432945	122416	NP_689539	NM_152326
230972_PM_at	230972_at	ANKRD9	ankyrin repeat domain 9	Consensus sequence	Hs.432945	122416	NP_689539	NM_152326
212747_PM_at	212747_at	ANKS1A	ankyrin repeat and sterile alpha motif domain containing 1A	Consensus sequence	Hs.656492	23294	NP_056060	NM_015245
227440_PM_at	227440_at	ANKS1B	ankyrin repeat and sterile alpha motif domain containing 1B	Consensus sequence	Hs.506458	56899	NP_064525 /// NP_690001 /// NP_858056	NM_020140 /// NM_152788 /// NM_181670
227439_PM_at	227439_at	ANKS1B	ankyrin repeat and sterile alpha motif domain containing 1B	Consensus sequence	Hs.506458	56899	NP_064525 /// NP_690001 /// NP_858056	NM_020140 /// NM_152788 /// NM_181670
219989_PM_s_at	219989_s_at	ANKS1B	ankyrin repeat and sterile alpha motif domain containing 1B	Exemplar sequence	Hs.506458	56899	NP_064525 /// NP_690001 /// NP_858056	NM_020140 /// NM_152788 /// NM_181670
227441_PM_s_at	227441_s_at	ANKS1B	ankyrin repeat and sterile alpha motif domain containing 1B	Consensus sequence	Hs.506458	56899	NP_064525 /// NP_690001 /// NP_858056	NM_020140 /// NM_152788 /// NM_181670
240292_PM_x_at	240292_x_at	ANKS1B	ankyrin repeat and sterile alpha motif domain containing 1B	Consensus sequence	Hs.506458	56899	NP_064525 /// NP_690001 /// NP_858056	NM_020140 /// NM_152788 /// NM_181670
227303_PM_at	227303_at	ANKS3	ankyrin repeat and sterile alpha motif domain containing 3	Consensus sequence	Hs.654859	124401	NP_597707	NM_133450
239087_PM_at	239087_at	ANKS4B	ankyrin repeat and sterile alpha motif domain containing 4B	Consensus sequence	Hs.115959	257629	NP_665872	NM_145865
1554923_PM_at	1554923_at	ANKS6	ankyrin repeat and sterile alpha motif domain containing 6	Consensus sequence	Hs.406890	203286	NP_775822	NM_173551
235903_PM_at	235903_at	ANKS6	ankyrin repeat and sterile alpha motif domain containing 6	Consensus sequence	Hs.406890	203286	NP_775822	NM_173551
238626_PM_at	238626_at	ANKS6	ankyrin repeat and sterile alpha motif domain containing 6	Consensus sequence	Hs.406890	203286	NP_775822	NM_173551
226586_PM_at	226586_at	ANKS6	ankyrin repeat and sterile alpha motif domain containing 6	Consensus sequence	Hs.406890	203286	NP_775822	NM_173551
218274_PM_s_at	218274_s_at	ANKZF1	ankyrin repeat and zinc finger domain containing 1	Exemplar sequence	Hs.437647	55139	NP_001035869 /// NP_060559	NM_001042410 /// NM_018089
1552619_PM_a_at	1552619_a_at	ANLN	anillin, actin binding protein	Consensus sequence	Hs.62180	54443	NP_061155	NM_018685
222608_PM_s_at	222608_s_at	ANLN	anillin, actin binding protein	Consensus sequence	Hs.62180	54443	NP_061155	NM_018685
1555269_PM_a_at	1555269_a_at	ANO1	anoctamin 1, calcium activated chloride channel	Consensus sequence	Hs.503074	55107	NP_060513	NM_018043 /// NR_030691
218804_PM_at	218804_at	ANO1	anoctamin 1, calcium activated chloride channel	Exemplar sequence	Hs.503074	55107	NP_060513	NM_018043 /// NR_030691
218910_PM_at	218910_at	ANO10	anoctamin 10	Exemplar sequence	Hs.656657	55129	NP_060545	NM_018075
220111_PM_s_at	220111_s_at	ANO2	anoctamin 2	Exemplar sequence	Hs.148970	57101	NP_065106	NM_020373
234718_PM_at	234718_at	ANO2	anoctamin 2	Consensus sequence	Hs.148970	57101	NP_065106	NM_020373
215241_PM_at	215241_at	ANO3	anoctamin 3	Consensus sequence	Hs.91791	63982	NP_113606	NM_031418
236420_PM_s_at	236420_s_at	ANO4	anoctamin 4	Consensus sequence	Hs.58785	121601	NP_849148	NM_178826
239883_PM_s_at	239883_s_at	ANO4	Anoctamin 4	Consensus sequence	Hs.58785	121601	NP_849148	NM_178826
229749_PM_at	229749_at	ANO4	anoctamin 4	Consensus sequence	Hs.58785	121601	NP_849148	NM_178826
229313_PM_at	229313_at	ANO5	anoctamin 5	Consensus sequence	Hs.154329	203859	NP_001136121 /// NP_998764	NM_001142649 /// NM_213599
240947_PM_at	240947_at	ANO6	anoctamin 6	Consensus sequence	Hs.505339	196527	NP_001020527 /// NP_001136150 /// NP_001136151 /// NP_001136152	NM_001025356 /// NM_001142678 /// NM_001142679 /// NM_001142680
224906_PM_at	224906_at	ANO6	anoctamin 6	Consensus sequence	Hs.505339	196527	NP_001020527 /// NP_001136150 /// NP_001136151 /// NP_001136152	NM_001025356 /// NM_001142678 /// NM_001142679 /// NM_001142680
241918_PM_at	241918_at	ANO7	anoctamin 7	Consensus sequence	Hs.163909	50636	NP_001001666 /// NP_001001891	NM_001001666 /// NM_001001891
1563549_PM_a_at	1563549_a_at	ANO8	anoctamin 8	Consensus sequence	Hs.590990	57719	NP_066010	NM_020959
227393_PM_at	227393_at	ANO9	anoctamin 9	Consensus sequence	Hs.501622	338440	NP_001012302	NM_001012302
201043_PM_s_at	201043_s_at	ANP32A	acidic (leucine-rich) nuclear phosphoprotein 32 family, member A	Exemplar sequence	Hs.458747	8125	NP_006296	NM_006305
201051_PM_at	201051_at	ANP32A	acidic (leucine-rich) nuclear phosphoprotein 32 family, member A	Consensus sequence	Hs.458747	8125	NP_006296	NM_006305
201038_PM_s_at	201038_s_at	ANP32A	acidic (leucine-rich) nuclear phosphoprotein 32 family, member A	Consensus sequence	Hs.458747	8125	NP_006296	NM_006305
208571_PM_at	208571_at	ANP32A /// ANP32D	acidic (leucine-rich) nuclear phosphoprotein 32 family, member A /// acidic (leucine-rich) nuclear phosphoprotein 32 family, member D	Exemplar sequence	Hs.532658	23519 /// 8125	NP_006296 /// NP_036536	NM_006305 /// NM_012404
201306_PM_s_at	201306_s_at	ANP32B	acidic (leucine-rich) nuclear phosphoprotein 32 family, member B	Exemplar sequence	Hs.494604	10541	NP_006392	NM_006401
201305_PM_x_at	201305_x_at	ANP32B	acidic (leucine-rich) nuclear phosphoprotein 32 family, member B	Consensus sequence	Hs.494604	10541	NP_006392	NM_006401
208538_PM_at	208538_at	ANP32C	acidic (leucine-rich) nuclear phosphoprotein 32 family, member C	Exemplar sequence	Hs.661161	23520	NP_036535	NM_012403
208103_PM_s_at	208103_s_at	ANP32E	acidic (leucine-rich) nuclear phosphoprotein 32 family, member E	Exemplar sequence	Hs.656466	81611	NP_001129950 /// NP_001129951 /// NP_112182	NM_001136478 /// NM_001136479 /// NM_030920
221505_PM_at	221505_at	ANP32E	acidic (leucine-rich) nuclear phosphoprotein 32 family, member E	Consensus sequence	Hs.656466	81611	NP_001129950 /// NP_001129951 /// NP_112182	NM_001136478 /// NM_001136479 /// NM_030920
234576_PM_at	234576_at	ANPEP	Alanyl (membrane) aminopeptidase	Consensus sequence	Hs.1239	290	NP_001141	NM_001150
234458_PM_at	234458_at	ANPEP	Alanyl (membrane) aminopeptidase	Consensus sequence	Hs.1239	290	NP_001141	NM_001150
202888_PM_s_at	202888_s_at	ANPEP	alanyl (membrane) aminopeptidase	Exemplar sequence	Hs.1239	290	NP_001141	NM_001150
227660_PM_at	227660_at	ANTXR1	anthrax toxin receptor 1	Consensus sequence	Hs.165859	84168	NP_060623 /// NP_115584 /// NP_444262	NM_018153 /// NM_032208 /// NM_053034
234430_PM_at	234430_at	ANTXR1	Anthrax toxin receptor 1	Consensus sequence	Hs.165859	84168	NP_060623 /// NP_115584 /// NP_444262	NM_018153 /// NM_032208 /// NM_053034
224694_PM_at	224694_at	ANTXR1	anthrax toxin receptor 1	Consensus sequence	Hs.165859	84168	NP_060623 /// NP_115584 /// NP_444262	NM_018153 /// NM_032208 /// NM_053034
220092_PM_s_at	220092_s_at	ANTXR1	anthrax toxin receptor 1	Exemplar sequence	Hs.165859	84168	NP_060623 /// NP_115584 /// NP_444262	NM_018153 /// NM_032208 /// NM_053034
220093_PM_at	220093_at	ANTXR1	anthrax toxin receptor 1	Exemplar sequence	Hs.165859	84168	NP_060623 /// NP_115584 /// NP_444262	NM_018153 /// NM_032208 /// NM_053034
234832_PM_at	234832_at	ANTXR1	Anthrax toxin receptor 1	Consensus sequence	Hs.165859	84168	NP_060623 /// NP_115584 /// NP_444262	NM_018153 /// NM_032208 /// NM_053034
228573_PM_at	228573_at	ANTXR2	anthrax toxin receptor 2	Consensus sequence	Hs.162963	118429	NP_001139266 /// NP_477520	NM_001145794 /// NM_058172
238050_PM_at	238050_at	ANTXR2	anthrax toxin receptor 2	Consensus sequence	Hs.162963	118429	NP_001139266 /// NP_477520	NM_001145794 /// NM_058172
225524_PM_at	225524_at	ANTXR2	anthrax toxin receptor 2	Consensus sequence	Hs.162963	118429	NP_001139266 /// NP_477520	NM_001145794 /// NM_058172
1555536_PM_at	1555536_at	ANTXR2	anthrax toxin receptor 2	Consensus sequence	Hs.162963	118429	NP_001139266 /// NP_477520	NM_001145794 /// NM_058172
244206_PM_at	244206_at	ANUBL1	AN1, ubiquitin-like, homolog (Xenopus laevis)	Consensus sequence	Hs.89029	93550	NP_001121796 /// NP_777550	NM_001128324 /// NM_174890
223624_PM_at	223624_at	ANUBL1	AN1, ubiquitin-like, homolog (Xenopus laevis)	Exemplar sequence	Hs.89029	93550	NP_001121796 /// NP_777550	NM_001128324 /// NM_174890
201012_PM_at	201012_at	ANXA1	annexin A1	Exemplar sequence	Hs.494173	301	NP_000691	NM_000700
233011_PM_at	233011_at	ANXA1	Annexin A1	Consensus sequence	Hs.494173	301	NP_000691	NM_000700
210143_PM_at	210143_at	ANXA10	annexin A10	Exemplar sequence	Hs.188401	11199	NP_009124	NM_007193
206200_PM_s_at	206200_s_at	ANXA11	annexin A11	Exemplar sequence	Hs.530291	311	NP_001148 /// NP_665875 /// NP_665876	NM_001157 /// NM_145868 /// NM_145869
228727_PM_at	228727_at	ANXA11	annexin A11	Consensus sequence	Hs.530291	311	NP_001148 /// NP_665875 /// NP_665876	NM_001157 /// NM_145868 /// NM_145869
214783_PM_s_at	214783_s_at	ANXA11	annexin A11	Consensus sequence	Hs.530291	311	NP_001148 /// NP_665875 /// NP_665876	NM_001157 /// NM_145868 /// NM_145869
208323_PM_s_at	208323_s_at	ANXA13	annexin A13	Exemplar sequence	Hs.181107	312	NP_001003954 /// NP_004297	NM_001003954 /// NM_004306
210427_PM_x_at	210427_x_at	ANXA2	annexin A2	Exemplar sequence	Hs.511605	302	NP_001002857 /// NP_001002858 /// NP_001129487 /// NP_004030	NM_001002857 /// NM_001002858 /// NM_001136015 /// NM_004039
213503_PM_x_at	213503_x_at	ANXA2	annexin A2	Consensus sequence	Hs.511605	302	NP_001002857 /// NP_001002858 /// NP_001129487 /// NP_004030	NM_001002857 /// NM_001002858 /// NM_001136015 /// NM_004039
1568126_PM_at	1568126_at	ANXA2	annexin A2	Consensus sequence	Hs.511605	302	NP_001002857 /// NP_001002858 /// NP_001129487 /// NP_004030	NM_001002857 /// NM_001002858 /// NM_001136015 /// NM_004039
201590_PM_x_at	201590_x_at	ANXA2	annexin A2	Exemplar sequence	Hs.511605	302	NP_001002857 /// NP_001002858 /// NP_001129487 /// NP_004030	NM_001002857 /// NM_001002858 /// NM_001136015 /// NM_004039
210876_PM_at	210876_at	ANXA2P1	annexin A2 pseudogene 1	Exemplar sequence	Hs.546235	303	---	NR_001562
208816_PM_x_at	208816_x_at	ANXA2P2	annexin A2 pseudogene 2	Exemplar sequence	Hs.534301	304	---	NR_003573
211241_PM_at	211241_at	ANXA2P3	annexin A2 pseudogene 3	Exemplar sequence	Hs.591361	305	---	NR_001446
209369_PM_at	209369_at	ANXA3	annexin A3	Exemplar sequence	Hs.480042	306	NP_005130	NM_005139
201301_PM_s_at	201301_s_at	ANXA4	annexin A4	Exemplar sequence	Hs.422986	307	NP_001144	NM_001153
201302_PM_at	201302_at	ANXA4	annexin A4	Exemplar sequence	Hs.422986	307	NP_001144	NM_001153
200782_PM_at	200782_at	ANXA5	annexin A5	Exemplar sequence	Hs.480653	308	NP_001145	NM_001154
244250_PM_at	244250_at	ANXA6	annexin A6	Consensus sequence	Hs.412117	309	NP_001146 /// NP_004024	NM_001155 /// NM_004033
200982_PM_s_at	200982_s_at	ANXA6	annexin A6	Exemplar sequence	Hs.412117	309	NP_001146 /// NP_004024	NM_001155 /// NM_004033
201366_PM_at	201366_at	ANXA7	annexin A7	Exemplar sequence	Hs.631827	310	NP_001147 /// NP_004025	NM_001156 /// NM_004034
209860_PM_s_at	209860_s_at	ANXA7	annexin A7	Exemplar sequence	Hs.631827	310	NP_001147 /// NP_004025	NM_001156 /// NM_004034
203074_PM_at	203074_at	ANXA8 /// ANXA8L1 /// ANXA8L2	annexin A8 /// annexin A8-like 1 /// annexin A8-like 2	Exemplar sequence	Hs.723897	244 /// 653145 /// 728113	NP_001035173 /// NP_001092315 /// NP_001621	NM_001040084 /// NM_001098845 /// NM_001630
1557094_PM_at	1557094_at	ANXA8 /// ANXA8L1 /// ANXA8L2 /// LOC653110	annexin A8 /// annexin A8-like 1 /// annexin A8-like 2 /// hypothetical LOC653110	Consensus sequence	Hs.723897	244 /// 653110 /// 653145 /// 728113	NP_001035173 /// NP_001092315 /// NP_001621	NM_001040084 /// NM_001098845 /// NM_001630 /// XR_015244 /// XR_041080
210085_PM_s_at	210085_s_at	ANXA9	annexin A9	Exemplar sequence	Hs.3346	8416	NP_003559	NM_003568
211712_PM_s_at	211712_s_at	ANXA9	annexin A9	Exemplar sequence	Hs.3346	8416	NP_003559	NM_003568
205639_PM_at	205639_at	AOAH	acyloxyacyl hydrolase (neutrophil)	Exemplar sequence	Hs.488007	313	NP_001170977 /// NP_001170978 /// NP_001628	NM_001177506 /// NM_001177507 /// NM_001637
207064_PM_s_at	207064_s_at	AOC2	amine oxidase, copper containing 2 (retina-specific)	Exemplar sequence	Hs.143102	314	NP_001149 /// NP_033720	NM_001158 /// NM_009590
204894_PM_s_at	204894_s_at	AOC3	amine oxidase, copper containing 3 (vascular adhesion protein 1)	Exemplar sequence	Hs.198241	8639	NP_003725	NM_003734
205082_PM_s_at	205082_s_at	AOX1	aldehyde oxidase 1	Exemplar sequence	Hs.406238	316	NP_001150	NM_001159
205083_PM_at	205083_at	AOX1	aldehyde oxidase 1	Exemplar sequence	Hs.406238	316	NP_001150	NM_001159
242753_PM_x_at	242753_x_at	AP1AR	adaptor-related protein complex 1 associated regulatory protein	Consensus sequence	Hs.435991	55435	NP_001121898 /// NP_061039	NM_001128426 /// NM_018569
219023_PM_at	219023_at	AP1AR	adaptor-related protein complex 1 associated regulatory protein	Exemplar sequence	Hs.435991	55435	NP_001121898 /// NP_061039	NM_001128426 /// NM_018569
231010_PM_at	231010_at	AP1AR	Adaptor-related protein complex 1 associated regulatory protein	Consensus sequence	Hs.435991	55435	NP_001121898 /// NP_061039	NM_001128426 /// NM_018569
205423_PM_at	205423_at	AP1B1	adaptor-related protein complex 1, beta 1 subunit	Exemplar sequence	Hs.368794	162	NP_001118 /// NP_001159491 /// NP_663782	NM_001127 /// NM_001166019 /// NM_145730
225754_PM_at	225754_at	AP1G1	adaptor-related protein complex 1, gamma 1 subunit	Consensus sequence	Hs.461253	164	NP_001025178 /// NP_001119	NM_001030007 /// NM_001128
203350_PM_at	203350_at	AP1G1	adaptor-related protein complex 1, gamma 1 subunit	Exemplar sequence	Hs.461253	164	NP_001025178 /// NP_001119	NM_001030007 /// NM_001128
225771_PM_at	225771_at	AP1G1	adaptor-related protein complex 1, gamma 1 subunit	Consensus sequence	Hs.461253	164	NP_001025178 /// NP_001119	NM_001030007 /// NM_001128
201613_PM_s_at	201613_s_at	AP1G2	adaptor-related protein complex 1, gamma 2 subunit	Exemplar sequence	Hs.343244	8906	NP_003908	NM_003917
223024_PM_at	223024_at	AP1M1	adaptor-related protein complex 1, mu 1 subunit	Consensus sequence	Hs.71040	8907	NP_001123996 /// NP_115882	NM_001130524 /// NM_032493
223025_PM_s_at	223025_s_at	AP1M1	adaptor-related protein complex 1, mu 1 subunit	Exemplar sequence	Hs.71040	8907	NP_001123996 /// NP_115882	NM_001130524 /// NM_032493
218261_PM_at	218261_at	AP1M2	adaptor-related protein complex 1, mu 2 subunit	Exemplar sequence	Hs.18894	10053	NP_005489	NM_005498
65517_PM_at	65517_at	AP1M2	adaptor-related protein complex 1, mu 2 subunit	Consensus sequence	Hs.18894	10053	NP_005489	NM_005498
209635_PM_at	209635_at	AP1S1	adaptor-related protein complex 1, sigma 1 subunit	Exemplar sequence	Hs.608391	1174	NP_001274	NM_001283
205195_PM_at	205195_at	AP1S1	adaptor-related protein complex 1, sigma 1 subunit	Exemplar sequence	Hs.608391	1174	NP_001274	NM_001283
205196_PM_s_at	205196_s_at	AP1S1	adaptor-related protein complex 1, sigma 1 subunit	Exemplar sequence	Hs.608391	1174	NP_001274	NM_001283
230413_PM_s_at	230413_s_at	AP1S2	Adaptor-related protein complex 1, sigma 2 subunit	Consensus sequence	Hs.653504	8905	NP_003907	NM_003916
203300_PM_x_at	203300_x_at	AP1S2	adaptor-related protein complex 1, sigma 2 subunit	Exemplar sequence	Hs.653504	8905	NP_003907	NM_003916
230264_PM_s_at	230264_s_at	AP1S2	adaptor-related protein complex 1, sigma 2 subunit	Consensus sequence	Hs.653504	8905	NP_003907	NM_003916
203299_PM_s_at	203299_s_at	AP1S2	adaptor-related protein complex 1, sigma 2 subunit	Exemplar sequence	Hs.653504	8905	NP_003907	NM_003916
228415_PM_at	228415_at	AP1S2	adaptor-related protein complex 1, sigma 2 subunit	Consensus sequence	Hs.653504	8905	NP_003907	NM_003916
1555734_PM_x_at	1555734_x_at	AP1S3	adaptor-related protein complex 1, sigma 3 subunit	Consensus sequence	Hs.632555	130340	NP_001034658	NM_001039569
1555731_PM_a_at	1555731_a_at	AP1S3	adaptor-related protein complex 1, sigma 3 subunit	Consensus sequence	Hs.632555	130340	NP_001034658	NM_001039569
1555421_PM_at	1555421_at	AP1S3	adaptor-related protein complex 1, sigma 3 subunit	Consensus sequence	Hs.632555	130340	NP_001034658	NM_001039569
1555733_PM_s_at	1555733_s_at	AP1S3	adaptor-related protein complex 1, sigma 3 subunit	Consensus sequence	Hs.632555	130340	NP_001034658	NM_001039569
237159_PM_x_at	237159_x_at	AP1S3	adaptor-related protein complex 1, sigma 3 subunit	Consensus sequence	Hs.632555	130340	NP_001034658	NM_001039569
223237_PM_x_at	223237_x_at	AP2A1	adaptor-related protein complex 2, alpha 1 subunit	Exemplar sequence	Hs.467125	160	NP_055018 /// NP_570603	NM_014203 /// NM_130787
1558792_PM_x_at	1558792_x_at	AP2A1	Adaptor-related protein complex 2, alpha 1 subunit	Consensus sequence	Hs.467125	160	NP_055018 /// NP_570603	NM_014203 /// NM_130787
234068_PM_s_at	234068_s_at	AP2A1	adaptor-related protein complex 2, alpha 1 subunit	Consensus sequence	Hs.467125	160	NP_055018 /// NP_570603	NM_014203 /// NM_130787
229617_PM_x_at	229617_x_at	AP2A1	adaptor-related protein complex 2, alpha 1 subunit	Consensus sequence	Hs.467125	160	NP_055018 /// NP_570603	NM_014203 /// NM_130787
212161_PM_at	212161_at	AP2A2	adaptor-related protein complex 2, alpha 2 subunit	Consensus sequence	Hs.19121	161	NP_036437	NM_012305
212159_PM_x_at	212159_x_at	AP2A2	adaptor-related protein complex 2, alpha 2 subunit	Consensus sequence	Hs.19121	161	NP_036437	NM_012305
215764_PM_x_at	215764_x_at	AP2A2	adaptor-related protein complex 2, alpha 2 subunit	Consensus sequence	Hs.19121	161	NP_036437	NM_012305
211779_PM_x_at	211779_x_at	AP2A2	adaptor-related protein complex 2, alpha 2 subunit	Exemplar sequence	Hs.19121	161	NP_036437	NM_012305
200615_PM_s_at	200615_s_at	AP2B1	adaptor-related protein complex 2, beta 1 subunit	Consensus sequence	Hs.514819	163	NP_001025177 /// NP_001273	NM_001030006 /// NM_001282
200612_PM_s_at	200612_s_at	AP2B1	adaptor-related protein complex 2, beta 1 subunit	Exemplar sequence	Hs.514819	163	NP_001025177 /// NP_001273	NM_001030006 /// NM_001282
200613_PM_at	200613_at	AP2M1	adaptor-related protein complex 2, mu 1 subunit	Exemplar sequence	Hs.518460	1173	NP_001020376 /// NP_004059	NM_001025205 /// NM_004068
208074_PM_s_at	208074_s_at	AP2S1	adaptor-related protein complex 2, sigma 1 subunit	Exemplar sequence	Hs.119591	1175	NP_004060 /// NP_067586	NM_004069 /// NM_021575
202120_PM_x_at	202120_x_at	AP2S1	adaptor-related protein complex 2, sigma 1 subunit	Exemplar sequence	Hs.119591	1175	NP_004060 /// NP_067586	NM_004069 /// NM_021575
211047_PM_x_at	211047_x_at	AP2S1	adaptor-related protein complex 2, sigma 1 subunit	Exemplar sequence	Hs.119591	1175	NP_004060 /// NP_067586	NM_004069 /// NM_021575
203141_PM_s_at	203141_s_at	AP3B1	adaptor-related protein complex 3, beta 1 subunit	Consensus sequence	Hs.532091	8546	NP_003655	NM_003664
203142_PM_s_at	203142_s_at	AP3B1	adaptor-related protein complex 3, beta 1 subunit	Exemplar sequence	Hs.532091	8546	NP_003655	NM_003664
205678_PM_at	205678_at	AP3B2	adaptor-related protein complex 3, beta 2 subunit	Exemplar sequence	Hs.199593	8120	NP_004635	NM_004644
1570032_PM_at	1570032_at	AP3B2	adaptor-related protein complex 3, beta 2 subunit	Consensus sequence	Hs.199593	8120	NP_004635	NM_004644
210974_PM_s_at	210974_s_at	AP3D1	adaptor-related protein complex 3, delta 1 subunit	Exemplar sequence	Hs.512815	8943	NP_001070991 /// NP_003929	NM_001077523 /// NM_003938
206592_PM_s_at	206592_s_at	AP3D1	adaptor-related protein complex 3, delta 1 subunit	Exemplar sequence	Hs.512815	8943	NP_001070991 /// NP_003929	NM_001077523 /// NM_003938
208710_PM_s_at	208710_s_at	AP3D1	adaptor-related protein complex 3, delta 1 subunit	Consensus sequence	Hs.512815	8943	NP_001070991 /// NP_003929	NM_001077523 /// NM_003938
222516_PM_at	222516_at	AP3M1	adaptor-related protein complex 3, mu 1 subunit	Consensus sequence	Hs.500104	26985	NP_036227 /// NP_996895	NM_012095 /// NM_207012
222517_PM_at	222517_at	AP3M1	adaptor-related protein complex 3, mu 1 subunit	Consensus sequence	Hs.500104	26985	NP_036227 /// NP_996895	NM_012095 /// NM_207012
1569053_PM_at	1569053_at	AP3M2	adaptor-related protein complex 3, mu 2 subunit	Consensus sequence	Hs.654529	10947	NP_001127768 /// NP_006794	NM_001134296 /// NM_006803
203410_PM_at	203410_at	AP3M2	adaptor-related protein complex 3, mu 2 subunit	Exemplar sequence	Hs.654529	10947	NP_001127768 /// NP_006794	NM_001134296 /// NM_006803
202442_PM_at	202442_at	AP3S1	adaptor-related protein complex 3, sigma 1 subunit	Exemplar sequence	Hs.406191	1176	NP_001275	NM_001284
213215_PM_at	213215_at	AP3S2	adaptor-related protein complex 3, sigma 2 subunit	Consensus sequence	Hs.632161	10239	NP_005820	NM_005829 /// NR_023361
202398_PM_at	202398_at	AP3S2	adaptor-related protein complex 3, sigma 2 subunit	Exemplar sequence	Hs.632161	10239	NP_005820	NM_005829 /// NR_023361
202399_PM_s_at	202399_s_at	AP3S2	adaptor-related protein complex 3, sigma 2 subunit	Exemplar sequence	Hs.632161	10239	NP_005820	NM_005829 /// NR_023361
231962_PM_at	231962_at	AP4B1	adaptor-related protein complex 4, beta 1 subunit	Consensus sequence	Hs.515048	10717	NP_006585	NM_006594
236221_PM_at	236221_at	AP4B1	Adaptor-related protein complex 4, beta 1 subunit	Consensus sequence	Hs.515048	10717	NP_006585	NM_006594
231714_PM_s_at	231714_s_at	AP4B1	adaptor-related protein complex 4, beta 1 subunit	Consensus sequence	Hs.515048	10717	NP_006585	NM_006594
228164_PM_at	228164_at	AP4E1	adaptor-related protein complex 4, epsilon 1 subunit	Consensus sequence	Hs.413366	23431	NP_031373	NM_007347
241174_PM_at	241174_at	AP4E1	Adaptor-related protein complex 4, epsilon 1 subunit	Consensus sequence	Hs.413366	23431	NP_031373	NM_007347
220229_PM_s_at	220229_s_at	AP4E1	adaptor-related protein complex 4, epsilon 1 subunit	Exemplar sequence	Hs.413366	23431	NP_031373	NM_007347
220228_PM_at	220228_at	AP4E1	adaptor-related protein complex 4, epsilon 1 subunit	Consensus sequence	Hs.413366	23431	NP_031373	NM_007347
209837_PM_at	209837_at	AP4M1	adaptor-related protein complex 4, mu 1 subunit	Exemplar sequence	Hs.632317	9179	NP_004713	NM_004722
235647_PM_at	235647_at	AP4S1	Adaptor-related protein complex 4, sigma 1 subunit	Consensus sequence	Hs.293411	11154	NP_001121598 /// NP_009008	NM_001128126 /// NM_007077
210278_PM_s_at	210278_s_at	AP4S1	adaptor-related protein complex 4, sigma 1 subunit	Exemplar sequence	Hs.293411	11154	NP_001121598 /// NP_009008	NM_001128126 /// NM_007077
210952_PM_at	210952_at	AP4S1	adaptor-related protein complex 4, sigma 1 subunit	Exemplar sequence	Hs.293411	11154	NP_001121598 /// NP_009008	NM_001128126 /// NM_007077
210277_PM_at	210277_at	AP4S1	adaptor-related protein complex 4, sigma 1 subunit	Exemplar sequence	Hs.293411	11154	NP_001121598 /// NP_009008	NM_001128126 /// NM_007077
211553_PM_x_at	211553_x_at	APAF1	apoptotic peptidase activating factor 1	Exemplar sequence	Hs.724521	317	NP_001151 /// NP_037361 /// NP_863651 /// NP_863658 /// NP_863659	NM_001160 /// NM_013229 /// NM_181861 /// NM_181868 /// NM_181869
211554_PM_s_at	211554_s_at	APAF1	apoptotic peptidase activating factor 1	Exemplar sequence	Hs.724521	317	NP_001151 /// NP_037361 /// NP_863651 /// NP_863658 /// NP_863659	NM_001160 /// NM_013229 /// NM_181861 /// NM_181868 /// NM_181869
204859_PM_s_at	204859_s_at	APAF1	apoptotic peptidase activating factor 1	Exemplar sequence	Hs.724521	317	NP_001151 /// NP_037361 /// NP_863651 /// NP_863658 /// NP_863659	NM_001160 /// NM_013229 /// NM_181861 /// NM_181868 /// NM_181869
206679_PM_at	206679_at	APBA1	amyloid beta (A4) precursor protein-binding, family A, member 1	Exemplar sequence	Hs.171939	320	NP_001154	NM_001163
228101_PM_at	228101_at	APBA1	amyloid beta (A4) precursor protein-binding, family A, member 1	Consensus sequence	Hs.171939	320	NP_001154	NM_001163
209871_PM_s_at	209871_s_at	APBA2	amyloid beta (A4) precursor protein-binding, family A, member 2	Exemplar sequence	Hs.618112	321	NP_001123886 /// NP_005494	NM_001130414 /// NM_005503
209870_PM_s_at	209870_s_at	APBA2	amyloid beta (A4) precursor protein-binding, family A, member 2	Consensus sequence	Hs.721380	321	NP_001123886 /// NP_005494	NM_001130414 /// NM_005503
215148_PM_s_at	215148_s_at	APBA3	amyloid beta (A4) precursor protein-binding, family A, member 3	Consensus sequence	Hs.465607	9546	NP_004877	NM_004886
205146_PM_x_at	205146_x_at	APBA3	amyloid beta (A4) precursor protein-binding, family A, member 3	Exemplar sequence	Hs.465607	9546	NP_004877	NM_004886
202652_PM_at	202652_at	APBB1	amyloid beta (A4) precursor protein-binding, family B, member 1 (Fe65)	Exemplar sequence	Hs.372840	322	NP_001155 /// NP_663722	NM_001164 /// NM_145689
230925_PM_at	230925_at	APBB1IP	amyloid beta (A4) precursor protein-binding, family B, member 1 interacting protein	Consensus sequence	Hs.310421	54518	NP_061916	NM_019043
1554571_PM_at	1554571_at	APBB1IP	amyloid beta (A4) precursor protein-binding, family B, member 1 interacting protein	Consensus sequence	Hs.310421	54518	NP_061916	NM_019043
219994_PM_at	219994_at	APBB1IP	amyloid beta (A4) precursor protein-binding, family B, member 1 interacting protein	Exemplar sequence	Hs.310421	54518	NP_061916	NM_019043
216750_PM_at	216750_at	APBB2	amyloid beta (A4) precursor protein-binding, family B, member 2	Consensus sequence	Hs.479602	323	NP_001159522 /// NP_001159523 /// NP_001159524 /// NP_001159525 /// NP_001159526 /// NP_004298 /// NP_775098	NM_001166050 /// NM_001166051 /// NM_001166052 /// NM_001166053 /// NM_001166054 /// NM_004307 /// NM_173075
40148_PM_at	40148_at	APBB2	amyloid beta (A4) precursor protein-binding, family B, member 2	Consensus sequence	Hs.479602	323	NP_001159522 /// NP_001159523 /// NP_001159524 /// NP_001159525 /// NP_001159526 /// NP_004298 /// NP_775098	NM_001166050 /// NM_001166051 /// NM_001166052 /// NM_001166053 /// NM_001166054 /// NM_004307 /// NM_173075
216747_PM_at	216747_at	APBB2	amyloid beta (A4) precursor protein-binding, family B, member 2	Consensus sequence	Hs.479602	323	NP_001159522 /// NP_001159523 /// NP_001159524 /// NP_001159525 /// NP_001159526 /// NP_004298 /// NP_775098	NM_001166050 /// NM_001166051 /// NM_001166052 /// NM_001166053 /// NM_001166054 /// NM_004307 /// NM_173075
212972_PM_x_at	212972_x_at	APBB2	amyloid beta (A4) precursor protein-binding, family B, member 2	Consensus sequence	Hs.479602	323	NP_001159522 /// NP_001159523 /// NP_001159524 /// NP_001159525 /// NP_001159526 /// NP_004298 /// NP_775098	NM_001166050 /// NM_001166051 /// NM_001166052 /// NM_001166053 /// NM_001166054 /// NM_004307 /// NM_173075
212970_PM_at	212970_at	APBB2	amyloid beta (A4) precursor protein-binding, family B, member 2	Consensus sequence	Hs.479602	323	NP_001159522 /// NP_001159523 /// NP_001159524 /// NP_001159525 /// NP_001159526 /// NP_004298 /// NP_775098	NM_001166050 /// NM_001166051 /// NM_001166052 /// NM_001166053 /// NM_001166054 /// NM_004307 /// NM_173075
213419_PM_at	213419_at	APBB2	amyloid beta (A4) precursor protein-binding, family B, member 2	Consensus sequence	Hs.479602	323	NP_001159522 /// NP_001159523 /// NP_001159524 /// NP_001159525 /// NP_001159526 /// NP_004298 /// NP_775098	NM_001166050 /// NM_001166051 /// NM_001166052 /// NM_001166053 /// NM_001166054 /// NM_004307 /// NM_173075
212985_PM_at	212985_at	APBB2	amyloid beta (A4) precursor protein-binding, family B, member 2	Consensus sequence	Hs.479602	323	NP_001159522 /// NP_001159523 /// NP_001159524 /// NP_001159525 /// NP_001159526 /// NP_004298 /// NP_775098	NM_001166050 /// NM_001166051 /// NM_001166052 /// NM_001166053 /// NM_001166054 /// NM_004307 /// NM_173075
204650_PM_s_at	204650_s_at	APBB3	amyloid beta (A4) precursor protein-binding, family B, member 3	Exemplar sequence	Hs.529449	10307	NP_006042 /// NP_573418 /// NP_573419 /// NP_573420	NM_006051 /// NM_133172 /// NM_133173 /// NM_133174
216933_PM_x_at	216933_x_at	APC	adenomatous polyposis coli	Consensus sequence	Hs.158932	324	NP_000029 /// NP_001120982 /// NP_001120983	NM_000038 /// NM_001127510 /// NM_001127511
215310_PM_at	215310_at	APC	adenomatous polyposis coli	Consensus sequence	Hs.158932	324	NP_000029 /// NP_001120982 /// NP_001120983	NM_000038 /// NM_001127510 /// NM_001127511
203527_PM_s_at	203527_s_at	APC	adenomatous polyposis coli	Exemplar sequence	Hs.158932	324	NP_000029 /// NP_001120982 /// NP_001120983	NM_000038 /// NM_001127510 /// NM_001127511
203525_PM_s_at	203525_s_at	APC	adenomatous polyposis coli	Consensus sequence	Hs.158932	324	NP_000029 /// NP_001120982 /// NP_001120983	NM_000038 /// NM_001127510 /// NM_001127511
203526_PM_s_at	203526_s_at	APC	adenomatous polyposis coli	Exemplar sequence	Hs.158932	324	NP_000029 /// NP_001120982 /// NP_001120983	NM_000038 /// NM_001127510 /// NM_001127511
217174_PM_s_at	217174_s_at	APC2	adenomatosis polyposis coli 2	Consensus sequence	Hs.446376	10297	NP_005874	NM_005883
205320_PM_at	205320_at	APC2	adenomatosis polyposis coli 2	Exemplar sequence	Hs.446376	10297	NP_005874	NM_005883
225016_PM_at	225016_at	APCDD1	adenomatosis polyposis coli down-regulated 1	Consensus sequence	Hs.293274	147495	NP_694545	NM_153000
235548_PM_at	235548_at	APCDD1L	adenomatosis polyposis coli down-regulated 1-like	Consensus sequence	Hs.119286	164284	NP_699191	NM_153360
206350_PM_at	206350_at	APCS	amyloid P component, serum	Exemplar sequence	Hs.507080	325	NP_001630	NM_001639
242015_PM_x_at	242015_x_at	APEH	N-acylaminoacyl-peptide hydrolase	Consensus sequence	Hs.517969	327	NP_001631	NM_001640
201284_PM_s_at	201284_s_at	APEH	N-acylaminoacyl-peptide hydrolase	Exemplar sequence	Hs.517969	327	NP_001631	NM_001640
210027_PM_s_at	210027_s_at	APEX1	APEX nuclease (multifunctional DNA repair enzyme) 1	Exemplar sequence	Hs.73722	328	NP_001632 /// NP_542379 /// NP_542380	NM_001641 /// NM_080648 /// NM_080649
204408_PM_at	204408_at	APEX2	APEX nuclease (apurinic/apyrimidinic endonuclease) 2	Exemplar sequence	Hs.659558	27301	NP_055296	NM_014481
238813_PM_at	238813_at	APEX2	APEX nuclease (apurinic/apyrimidinic endonuclease) 2	Consensus sequence	Hs.659558	27301	NP_055296	NM_014481
237327_PM_at	237327_at	APH1A	anterior pharynx defective 1 homolog A (C. elegans)	Consensus sequence	Hs.108408	51107	NP_001071096 /// NP_057106	NM_001077628 /// NM_016022
1554417_PM_s_at	1554417_s_at	APH1A	anterior pharynx defective 1 homolog A (C. elegans)	Consensus sequence	Hs.108408	51107	NP_001071096 /// NP_057106	NM_001077628 /// NM_016022
218389_PM_s_at	218389_s_at	APH1A	anterior pharynx defective 1 homolog A (C. elegans)	Exemplar sequence	Hs.108408	51107	NP_001071096 /// NP_057106	NM_001077628 /// NM_016022
221036_PM_s_at	221036_s_at	APH1B	anterior pharynx defective 1 homolog B (C. elegans)	Exemplar sequence	Hs.511703	83464	NP_001139118 /// NP_112591	NM_001145646 /// NM_031301
226358_PM_at	226358_at	APH1B	anterior pharynx defective 1 homolog B (C. elegans)	Consensus sequence	Hs.511703	83464	NP_001139118 /// NP_112591	NM_001145646 /// NM_031301
201686_PM_x_at	201686_x_at	API5	apoptosis inhibitor 5	Exemplar sequence	Hs.435771	8539	NP_001136402 /// NP_001136403 /// NP_006586	NM_001142930 /// NM_001142931 /// NM_006595 /// NR_024625
233078_PM_at	233078_at	API5	apoptosis inhibitor 5	Consensus sequence	Hs.435771	8539	NP_001136402 /// NP_001136403 /// NP_006586	NM_001142930 /// NM_001142931 /// NM_006595 /// NR_024625
201687_PM_s_at	201687_s_at	API5	apoptosis inhibitor 5	Exemplar sequence	Hs.435771	8539	NP_001136402 /// NP_001136403 /// NP_006586	NM_001142930 /// NM_001142931 /// NM_006595 /// NR_024625
214959_PM_s_at	214959_s_at	API5	apoptosis inhibitor 5	Consensus sequence	Hs.435771	8539	NP_001136402 /// NP_001136403 /// NP_006586	NM_001142930 /// NM_001142931 /// NM_006595 /// NR_024625
214960_PM_at	214960_at	API5	apoptosis inhibitor 5	Consensus sequence	Hs.435771	8539	NP_001136402 /// NP_001136403 /// NP_006586	NM_001142930 /// NM_001142931 /// NM_006595 /// NR_024625
232630_PM_at	232630_at	APIP	APAF1 interacting protein	Consensus sequence	Hs.447794	51074	NP_057041	NM_015957
218698_PM_at	218698_at	APIP	APAF1 interacting protein	Exemplar sequence	Hs.447794	51074	NP_057041	NM_015957
213454_PM_at	213454_at	APITD1	apoptosis-inducing, TAF9-like domain 1	Consensus sequence	---	378708	NP_940946 /// NP_954988 /// NP_954992	NM_198544 /// NM_199294 /// NM_199295
241379_PM_at	241379_at	APLF	aprataxin and PNKP like factor	Consensus sequence	Hs.720369	200558	NP_775816	NM_173545
1555100_PM_at	1555100_at	APLF	aprataxin and PNKP like factor	Consensus sequence	Hs.720369	200558	NP_775816	NM_173545
222856_PM_at	222856_at	APLN	apelin	Consensus sequence	Hs.303084	8862	NP_059109	NM_017413
244166_PM_at	244166_at	APLN	Apelin	Consensus sequence	Hs.303084	8862	NP_059109	NM_017413
213592_PM_at	213592_at	APLNR	apelin receptor	Consensus sequence	Hs.724387	187	NP_005152	NM_005161 /// NR_027991
209462_PM_at	209462_at	APLP1	amyloid beta (A4) precursor-like protein 1	Exemplar sequence	Hs.74565	333	NP_001019978 /// NP_005157	NM_001024807 /// NM_005166
214875_PM_x_at	214875_x_at	APLP2	amyloid beta (A4) precursor-like protein 2	Consensus sequence	Hs.370247	334	NP_001135748 /// NP_001135749 /// NP_001135750 /// NP_001633	NM_001142276 /// NM_001142277 /// NM_001142278 /// NM_001642 /// NR_024515 /// NR_024516
208702_PM_x_at	208702_x_at	APLP2	amyloid beta (A4) precursor-like protein 2	Consensus sequence	Hs.370247	334	NP_001135748 /// NP_001135749 /// NP_001135750 /// NP_001633	NM_001142276 /// NM_001142277 /// NM_001142278 /// NM_001642 /// NR_024515 /// NR_024516
228520_PM_s_at	228520_s_at	APLP2	Amyloid beta (A4) precursor-like protein 2	Consensus sequence	Hs.370247	334	NP_001135748 /// NP_001135749 /// NP_001135750 /// NP_001633	NM_001142276 /// NM_001142277 /// NM_001142278 /// NM_001642 /// NR_024515 /// NR_024516
208703_PM_s_at	208703_s_at	APLP2	amyloid beta (A4) precursor-like protein 2	Consensus sequence	Hs.370247	334	NP_001135748 /// NP_001135749 /// NP_001135750 /// NP_001633	NM_001142276 /// NM_001142277 /// NM_001142278 /// NM_001642 /// NR_024515 /// NR_024516
208248_PM_x_at	208248_x_at	APLP2	amyloid beta (A4) precursor-like protein 2	Exemplar sequence	Hs.370247	334	NP_001135748 /// NP_001135749 /// NP_001135750 /// NP_001633	NM_001142276 /// NM_001142277 /// NM_001142278 /// NM_001642 /// NR_024515 /// NR_024516
208704_PM_x_at	208704_x_at	APLP2	amyloid beta (A4) precursor-like protein 2	Exemplar sequence	Hs.370247	334	NP_001135748 /// NP_001135749 /// NP_001135750 /// NP_001633	NM_001142276 /// NM_001142277 /// NM_001142278 /// NM_001642 /// NR_024515 /// NR_024516
208701_PM_at	208701_at	APLP2	Amyloid beta (A4) precursor-like protein 2	Consensus sequence	Hs.370247	334	NP_001135748 /// NP_001135749 /// NP_001135750 /// NP_001633	NM_001142276 /// NM_001142277 /// NM_001142278 /// NM_001642 /// NR_024515 /// NR_024516
211404_PM_s_at	211404_s_at	APLP2	amyloid beta (A4) precursor-like protein 2	Exemplar sequence	Hs.370247	334	NP_001135748 /// NP_001135749 /// NP_001135750 /// NP_001633	NM_001142276 /// NM_001142277 /// NM_001142278 /// NM_001642 /// NR_024515 /// NR_024516
204450_PM_x_at	204450_x_at	APOA1	apolipoprotein A-I	Exemplar sequence	Hs.93194	335	NP_000030	NM_000039
217073_PM_x_at	217073_x_at	APOA1	apolipoprotein A-I	Consensus sequence	Hs.93194	335	NP_000030	NM_000039
225427_PM_s_at	225427_s_at	APOA1BP	apolipoprotein A-I binding protein	Consensus sequence	Hs.528320	128240	NP_658985	NM_144772
219466_PM_s_at	219466_s_at	APOA2	apolipoprotein A-II	Exemplar sequence	Hs.237658	336	NP_001634	NM_001643
219465_PM_at	219465_at	APOA2	apolipoprotein A-II	Exemplar sequence	Hs.237658	336	NP_001634	NM_001643
206894_PM_at	206894_at	APOA4	apolipoprotein A-IV	Exemplar sequence	Hs.1247	337	NP_000473	NM_000482
224244_PM_s_at	224244_s_at	APOA5	apolipoprotein A-V	Exemplar sequence	Hs.283923	116519	NP_001160070 /// NP_443200	NM_001166598 /// NM_052968
224243_PM_at	224243_at	APOA5	apolipoprotein A-V	Exemplar sequence	Hs.283923	116519	NP_001160070 /// NP_443200	NM_001166598 /// NM_052968
205108_PM_s_at	205108_s_at	APOB	apolipoprotein B (including Ag(x) antigen)	Exemplar sequence	Hs.120759	338	NP_000375	NM_000384
223579_PM_s_at	223579_s_at	APOB	apolipoprotein B (including Ag(x) antigen)	Exemplar sequence	Hs.120759	338	NP_000375	NM_000384
220023_PM_at	220023_at	APOB48R	apolipoprotein B48 receptor	Exemplar sequence	Hs.200333	55911	NP_061160	NM_018690
207158_PM_at	207158_at	APOBEC1	apolipoprotein B mRNA editing enzyme, catalytic polypeptide 1	Exemplar sequence	Hs.560	339	NP_001635	NM_001644
206160_PM_at	206160_at	APOBEC2	apolipoprotein B mRNA editing enzyme, catalytic polypeptide-like 2	Exemplar sequence	Hs.555915	10930	NP_006780	NM_006789
210873_PM_x_at	210873_x_at	APOBEC3A	apolipoprotein B mRNA editing enzyme, catalytic polypeptide-like 3A	Exemplar sequence	Hs.348983	200315	NP_663745	NM_145699
206632_PM_s_at	206632_s_at	APOBEC3B	apolipoprotein B mRNA editing enzyme, catalytic polypeptide-like 3B	Exemplar sequence	Hs.226307	9582	NP_004891	NM_004900
209584_PM_x_at	209584_x_at	APOBEC3C	apolipoprotein B mRNA editing enzyme, catalytic polypeptide-like 3C	Exemplar sequence	Hs.441124	27350	NP_055323	NM_014508
1553831_PM_at	1553831_at	APOBEC3D	apolipoprotein B mRNA editing enzyme, catalytic polypeptide-like 3D	Consensus sequence	Hs.658626	140564	NP_689639	NM_152426
214994_PM_at	214994_at	APOBEC3F	apolipoprotein B mRNA editing enzyme, catalytic polypeptide-like 3F	Consensus sequence	Hs.659809	200316	NP_001006667 /// NP_660341	NM_001006666 /// NM_145298
243912_PM_x_at	243912_x_at	APOBEC3F	apolipoprotein B mRNA editing enzyme, catalytic polypeptide-like 3F	Consensus sequence	Hs.659809	200316	NP_001006667 /// NP_660341	NM_001006666 /// NM_145298
214995_PM_s_at	214995_s_at	APOBEC3F /// APOBEC3G	apolipoprotein B mRNA editing enzyme, catalytic polypeptide-like 3F /// apolipoprotein B mRNA editing enzyme, catalytic polypeptide-like 3G	Consensus sequence	Hs.659809	200316 /// 60489	NP_001006667 /// NP_068594 /// NP_660341	NM_001006666 /// NM_021822 /// NM_145298
215579_PM_at	215579_at	APOBEC3G	apolipoprotein B mRNA editing enzyme, catalytic polypeptide-like 3G	Consensus sequence	Hs.660143	60489	NP_068594	NM_021822
204205_PM_at	204205_at	APOBEC3G	apolipoprotein B mRNA editing enzyme, catalytic polypeptide-like 3G	Exemplar sequence	Hs.660143	60489	NP_068594	NM_021822
1554545_PM_at	1554545_at	APOBEC4	apolipoprotein B mRNA editing enzyme, catalytic polypeptide-like 4 (putative)	Consensus sequence	Hs.97335	403314	NP_982279	NM_203454
213553_PM_x_at	213553_x_at	APOC1	apolipoprotein C-I	Consensus sequence	Hs.110675	341	NP_001636	NM_001645
204416_PM_x_at	204416_x_at	APOC1	apolipoprotein C-I	Exemplar sequence	Hs.110675	341	NP_001636	NM_001645
231561_PM_s_at	231561_s_at	APOC2	Apolipoprotein C-II	Consensus sequence	Hs.75615	344	NP_000474	NM_000483
231562_PM_at	231562_at	APOC2	Apolipoprotein C-II	Consensus sequence	Hs.75615	344	NP_000474	NM_000483
204561_PM_x_at	204561_x_at	APOC2	apolipoprotein C-II	Exemplar sequence	Hs.75615	344	NP_000474	NM_000483
205820_PM_s_at	205820_s_at	APOC3	apolipoprotein C-III	Exemplar sequence	Hs.73849	345	NP_000031	NM_000040
231587_PM_at	231587_at	APOC3	Apolipoprotein C-III	Consensus sequence	Hs.73849	345	NP_000031	NM_000040
206738_PM_at	206738_at	APOC4	apolipoprotein C-IV	Exemplar sequence	Hs.655423	346	NP_001637	NM_001646
201525_PM_at	201525_at	APOD	apolipoprotein D	Exemplar sequence	Hs.522555	347	NP_001638	NM_001647
203381_PM_s_at	203381_s_at	APOE	apolipoprotein E	Consensus sequence	Hs.654439	348	NP_000032	NM_000041
212884_PM_x_at	212884_x_at	APOE	apolipoprotein E	Consensus sequence	Hs.654439	348	NP_000032	NM_000041
203382_PM_s_at	203382_s_at	APOE	apolipoprotein E	Exemplar sequence	Hs.654439	348	NP_000032	NM_000041
207262_PM_at	207262_at	APOF	apolipoprotein F	Exemplar sequence	Hs.534302	319	NP_001629	NM_001638
205216_PM_s_at	205216_s_at	APOH	apolipoprotein H (beta-2-glycoprotein I)	Exemplar sequence	Hs.445358	350	NP_000033	NM_000042
231359_PM_at	231359_at	APOH	Apolipoprotein H (beta-2-glycoprotein I)	Consensus sequence	Hs.445358	350	NP_000033	NM_000042
209546_PM_s_at	209546_s_at	APOL1	apolipoprotein L, 1	Exemplar sequence	Hs.114309	8542	NP_001130012 /// NP_001130013 /// NP_003652 /// NP_663318	NM_001136540 /// NM_001136541 /// NM_003661 /// NM_145343
221013_PM_s_at	221013_s_at	APOL2	apolipoprotein L, 2	Exemplar sequence	Hs.474740	23780	NP_112092 /// NP_663612	NM_030882 /// NM_145637
221653_PM_x_at	221653_x_at	APOL2	apolipoprotein L, 2	Exemplar sequence	Hs.474740	23780	NP_112092 /// NP_663612	NM_030882 /// NM_145637
221087_PM_s_at	221087_s_at	APOL3	apolipoprotein L, 3	Exemplar sequence	Hs.474737	80833	NP_055164 /// NP_085147 /// NP_663614 /// NP_663615 /// NP_663616 /// NP_663617	NM_014349 /// NM_030644 /// NM_145639 /// NM_145640 /// NM_145641 /// NM_145642 /// NR_027833 /// NR_027834 /// NR_027835
224491_PM_at	224491_at	APOL4	apolipoprotein L, 4	Exemplar sequence	Hs.115099	80832	NP_085146 /// NP_663693	NM_030643 /// NM_145660
223801_PM_s_at	223801_s_at	APOL4	apolipoprotein L, 4	Exemplar sequence	Hs.115099	80832	NP_085146 /// NP_663693	NM_030643 /// NM_145660
1555600_PM_s_at	1555600_s_at	APOL4	apolipoprotein L, 4	Consensus sequence	Hs.115099	80832	NP_085146 /// NP_663693	NM_030643 /// NM_145660
220478_PM_at	220478_at	APOL5	apolipoprotein L, 5	Exemplar sequence	Hs.326561	80831	NP_085145	NM_030642
241869_PM_at	241869_at	APOL6	apolipoprotein L, 6	Consensus sequence	Hs.257352	80830	NP_085144	NM_030641
1557236_PM_at	1557236_at	APOL6	apolipoprotein L, 6	Consensus sequence	Hs.257352	80830	NP_085144	NM_030641
1557116_PM_at	1557116_at	APOL6	apolipoprotein L, 6	Consensus sequence	Hs.257352	80830	NP_085144	NM_030641
219716_PM_at	219716_at	APOL6	apolipoprotein L, 6	Exemplar sequence	Hs.257352	80830	NP_085144	NM_030641
221031_PM_s_at	221031_s_at	APOLD1	apolipoprotein L domain containing 1	Exemplar sequence	Hs.23388	81575	NP_001123887 /// NP_110444	NM_001130415 /// NM_030817
205682_PM_x_at	205682_x_at	APOM	apolipoprotein M	Exemplar sequence	Hs.534468	55937	NP_061974	NM_019101
214910_PM_s_at	214910_s_at	APOM	apolipoprotein M	Consensus sequence	Hs.534468	55937	NP_061974	NM_019101
221620_PM_s_at	221620_s_at	APOO	apolipoprotein O	Exemplar sequence	Hs.495851	79135	NP_077027	NM_024122 /// NR_026545
213282_PM_at	213282_at	APOOL	Apolipoprotein O-like	Consensus sequence	Hs.512181	139322	NP_940852	NM_198450
244187_PM_at	244187_at	APOOL	Apolipoprotein O-like	Consensus sequence	Hs.706885	139322	NP_940852	NM_198450
213289_PM_at	213289_at	APOOL	Apolipoprotein O-like	Consensus sequence	Hs.512181	139322	NP_940852	NM_198450
222269_PM_at	222269_at	APOOL	apolipoprotein O-like	Consensus sequence	Hs.512181	139322	NP_940852	NM_198450
235433_PM_at	235433_at	APOOL	apolipoprotein O-like	Consensus sequence	Hs.512181	139322	NP_940852	NM_198450
200602_PM_at	200602_at	APP	amyloid beta (A4) precursor protein	Exemplar sequence	Hs.434980	351	NP_000475 /// NP_001129488 /// NP_001129601 /// NP_001129602 /// NP_001129603 /// NP_958816 /// NP_958817	NM_000484 /// NM_001136016 /// NM_001136129 /// NM_001136130 /// NM_001136131 /// NM_201413 /// NM_201414
214953_PM_s_at	214953_s_at	APP	amyloid beta (A4) precursor protein	Consensus sequence	Hs.434980	351	NP_000475 /// NP_001129488 /// NP_001129601 /// NP_001129602 /// NP_001129603 /// NP_958816 /// NP_958817	NM_000484 /// NM_001136016 /// NM_001136129 /// NM_001136130 /// NM_001136131 /// NM_201413 /// NM_201414
211277_PM_x_at	211277_x_at	APP	amyloid beta (A4) precursor protein	Exemplar sequence	Hs.434980	351	NP_000475 /// NP_001129488 /// NP_001129601 /// NP_001129602 /// NP_001129603 /// NP_958816 /// NP_958817	NM_000484 /// NM_001136016 /// NM_001136129 /// NM_001136130 /// NM_001136131 /// NM_201413 /// NM_201414
202629_PM_at	202629_at	APPBP2	amyloid beta precursor protein (cytoplasmic tail) binding protein 2	Consensus sequence	Hs.84084	10513	NP_006371	NM_006380
215402_PM_at	215402_at	APPBP2	amyloid beta precursor protein (cytoplasmic tail) binding protein 2	Consensus sequence	Hs.84084	10513	NP_006371	NM_006380
202631_PM_s_at	202631_s_at	APPBP2	amyloid beta precursor protein (cytoplasmic tail) binding protein 2	Exemplar sequence	Hs.84084	10513	NP_006371	NM_006380
202630_PM_at	202630_at	APPBP2	amyloid beta precursor protein (cytoplasmic tail) binding protein 2	Consensus sequence	Hs.84084	10513	NP_006371	NM_006380
222538_PM_s_at	222538_s_at	APPL1	adaptor protein, phosphotyrosine interaction, PH domain and leucine zipper containing 1	Consensus sequence	Hs.476415	26060	NP_036228	NM_012096
218158_PM_s_at	218158_s_at	APPL1	adaptor protein, phosphotyrosine interaction, PH domain and leucine zipper containing 1	Exemplar sequence	Hs.476415	26060	NP_036228	NM_012096
218218_PM_at	218218_at	APPL2	adaptor protein, phosphotyrosine interaction, PH domain and leucine zipper containing 2	Exemplar sequence	Hs.506603	55198	NP_060641	NM_018171
213892_PM_s_at	213892_s_at	APRT	adenine phosphoribosyltransferase	Consensus sequence	Hs.28914	353	NP_000476 /// NP_001025189	NM_000485 /// NM_001030018
203219_PM_s_at	203219_s_at	APRT	adenine phosphoribosyltransferase	Exemplar sequence	Hs.28914	353	NP_000476 /// NP_001025189	NM_000485 /// NM_001030018
218527_PM_at	218527_at	APTX	aprataxin	Exemplar sequence	Hs.20158	54840	NP_060162 /// NP_778239 /// NP_778241 /// NP_778242 /// NP_778243	NM_017692 /// NM_175069 /// NM_175071 /// NM_175072 /// NM_175073
222658_PM_s_at	222658_s_at	APTX	aprataxin	Exemplar sequence	Hs.20158	54840	NP_060162 /// NP_778239 /// NP_778241 /// NP_778242 /// NP_778243	NM_017692 /// NM_175069 /// NM_175071 /// NM_175072 /// NM_175073
209047_PM_at	209047_at	AQP1	aquaporin 1 (Colton blood group)	Consensus sequence	Hs.76152	358	NP_932766	NM_198098
207542_PM_s_at	207542_s_at	AQP1	aquaporin 1 (Colton blood group)	Exemplar sequence	Hs.76152	358	NP_932766	NM_198098
1555338_PM_s_at	1555338_s_at	AQP10	aquaporin 10	Consensus sequence	Hs.259048	89872	NP_536354	NM_080429
229526_PM_at	229526_at	AQP11	aquaporin 11	Consensus sequence	Hs.503345	282679	NP_766627	NM_173039
1554344_PM_s_at	1554344_s_at	AQP12A /// AQP12B	aquaporin 12A /// aquaporin 12B	Consensus sequence	Hs.437167	375318 /// 653437	NP_001095937 /// NP_945349	NM_001102467 /// NM_198998
1559575_PM_a_at	1559575_a_at	AQP12A /// AQP12B	aquaporin 12A /// aquaporin 12B	Consensus sequence	Hs.534650	375318 /// 653437	NP_001095937 /// NP_945349	NM_001102467 /// NM_198998
236630_PM_at	236630_at	AQP2	aquaporin 2 (collecting duct)	Consensus sequence	Hs.130730	359	NP_000477	NM_000486
240285_PM_at	240285_at	AQP2	aquaporin 2 (collecting duct)	Consensus sequence	Hs.130730	359	NP_000477	NM_000486
206672_PM_at	206672_at	AQP2	aquaporin 2 (collecting duct)	Exemplar sequence	Hs.130730	359	NP_000477	NM_000486
39248_PM_at	39248_at	AQP3	aquaporin 3 (Gill blood group)	Consensus sequence	Hs.234642	360	NP_004916	NM_004925
39249_PM_at	39249_at	AQP3	aquaporin 3 (Gill blood group)	Consensus sequence	Hs.234642	360	NP_004916	NM_004925
203747_PM_at	203747_at	AQP3	aquaporin 3 (Gill blood group)	Exemplar sequence	Hs.234642	360	NP_004916	NM_004925
210068_PM_s_at	210068_s_at	AQP4	aquaporin 4	Exemplar sequence	Hs.315369	361	NP_001641 /// NP_004019	NM_001650 /// NM_004028
210906_PM_x_at	210906_x_at	AQP4	aquaporin 4	Exemplar sequence	Hs.315369	361	NP_001641 /// NP_004019	NM_001650 /// NM_004028
210067_PM_at	210067_at	AQP4	aquaporin 4	Exemplar sequence	Hs.315369	361	NP_001641 /// NP_004019	NM_001650 /// NM_004028
226228_PM_at	226228_at	AQP4	aquaporin 4	Consensus sequence	Hs.315369	361	NP_001641 /// NP_004019	NM_001650 /// NM_004028
210066_PM_s_at	210066_s_at	AQP4	aquaporin 4	Exemplar sequence	Hs.315369	361	NP_001641 /// NP_004019	NM_001650 /// NM_004028
213611_PM_at	213611_at	AQP5	aquaporin 5	Consensus sequence	Hs.298023	362	NP_001642	NM_001651
208435_PM_s_at	208435_s_at	AQP6	aquaporin 6, kidney specific	Exemplar sequence	Hs.54505	363	NP_001643	NM_001652
216219_PM_at	216219_at	AQP6	aquaporin 6, kidney specific	Consensus sequence	Hs.54505	363	NP_001643	NM_001652
206955_PM_at	206955_at	AQP7	aquaporin 7	Exemplar sequence	Hs.455323	364	NP_001161	NM_001170
206784_PM_at	206784_at	AQP8	aquaporin 8	Exemplar sequence	Hs.176658	343	NP_001160	NM_001169
205568_PM_at	205568_at	AQP9	aquaporin 9	Exemplar sequence	Hs.104624	366	NP_066190	NM_020980
235382_PM_at	235382_at	AQPEP	laeverin	Consensus sequence	Hs.98288	206338	NP_776161	NM_173800
239895_PM_at	239895_at	AQR	Aquarius homolog (mouse)	Consensus sequence	Hs.510958	9716	NP_055506	NM_014691
212584_PM_at	212584_at	AQR	aquarius homolog (mouse)	Consensus sequence	Hs.510958	9716	NP_055506	NM_014691
212583_PM_at	212583_at	AQR	aquarius homolog (mouse)	Consensus sequence	Hs.510958	9716	NP_055506	NM_014691
226192_PM_at	226192_at	AR	androgen receptor	Consensus sequence	Hs.496240	367	NP_000035 /// NP_001011645	NM_000044 /// NM_001011645
226197_PM_at	226197_at	AR	androgen receptor	Consensus sequence	Hs.496240	367	NP_000035 /// NP_001011645	NM_000044 /// NM_001011645
211110_PM_s_at	211110_s_at	AR	androgen receptor	Exemplar sequence	Hs.496240	367	NP_000035 /// NP_001011645	NM_000044 /// NM_001011645
211621_PM_at	211621_at	AR	androgen receptor	Exemplar sequence	Hs.496240	367	NP_000035 /// NP_001011645	NM_000044 /// NM_001011645
201895_PM_at	201895_at	ARAF	v-raf murine sarcoma 3611 viral oncogene homolog	Exemplar sequence	Hs.446641	369	NP_001645	NM_001654
230652_PM_at	230652_at	ARAF	v-raf murine sarcoma 3611 viral oncogene homolog	Consensus sequence	Hs.446641	369	NP_001645	NM_001654
212516_PM_at	212516_at	ARAP1	ArfGAP with RhoGAP domain, ankyrin repeat and PH domain 1	Consensus sequence	Hs.503165	116985	NP_001035207 /// NP_001128662 /// NP_056057	NM_001040118 /// NM_001135190 /// NM_015242
34206_PM_at	34206_at	ARAP1	ArfGAP with RhoGAP domain, ankyrin repeat and PH domain 1	Consensus sequence	Hs.503165	116985	NP_001035207 /// NP_001128662 /// NP_056057	NM_001040118 /// NM_001135190 /// NM_015242
242039_PM_at	242039_at	ARAP1	ArfGAP with RhoGAP domain, ankyrin repeat and PH domain 1	Consensus sequence	Hs.503165	116985	NP_001035207 /// NP_001128662 /// NP_056057	NM_001040118 /// NM_001135190 /// NM_015242
213618_PM_at	213618_at	ARAP2	ArfGAP with RhoGAP domain, ankyrin repeat and PH domain 2	Consensus sequence	Hs.479451	116984	NP_056045	NM_015230
242402_PM_x_at	242402_x_at	ARAP2	ArfGAP with RhoGAP domain, ankyrin repeat and PH domain 2	Consensus sequence	Hs.479451	116984	NP_056045	NM_015230
214102_PM_at	214102_at	ARAP2	ArfGAP with RhoGAP domain, ankyrin repeat and PH domain 2	Consensus sequence	Hs.479451	116984	NP_056045	NM_015230
1561407_PM_at	1561407_at	ARAP2	ArfGAP with RhoGAP domain, ankyrin repeat and PH domain 2	Consensus sequence	Hs.479451	116984	NP_056045	NM_015230
218950_PM_at	218950_at	ARAP3	ArfGAP with RhoGAP domain, ankyrin repeat and PH domain 3	Exemplar sequence	Hs.25277	64411	NP_071926	NM_022481
235806_PM_at	235806_at	ARAP3	ArfGAP with RhoGAP domain, ankyrin repeat and PH domain 3	Consensus sequence	Hs.25277	64411	NP_071926	NM_022481
210090_PM_at	210090_at	ARC	activity-regulated cytoskeleton-associated protein	Exemplar sequence	Hs.40888	23237	NP_056008	NM_015193
201176_PM_s_at	201176_s_at	ARCN1	archain 1	Exemplar sequence	Hs.33642	372	NP_001135753 /// NP_001646	NM_001142281 /// NM_001655
205239_PM_at	205239_at	AREG	amphiregulin	Exemplar sequence	Hs.270833	374	NP_001648	NM_001657
215564_PM_at	215564_at	AREG	Amphiregulin	Consensus sequence	Hs.270833	374	NP_001648	NM_001657
1557285_PM_at	1557285_at	AREGB	Amphiregulin B	Consensus sequence	Hs.645475	727738	XP_001125684	XM_001125684
208750_PM_s_at	208750_s_at	ARF1	ADP-ribosylation factor 1	Consensus sequence	Hs.286221	375	NP_001019397 /// NP_001019398 /// NP_001019399 /// NP_001649	NM_001024226 /// NM_001024227 /// NM_001024228 /// NM_001658
244504_PM_x_at	244504_x_at	ARF1	ADP-ribosylation factor 1	Consensus sequence	Hs.286221	375	NP_001019397 /// NP_001019398 /// NP_001019399 /// NP_001649	NM_001024226 /// NM_001024227 /// NM_001024228 /// NM_001658
200065_PM_s_at	200065_s_at	ARF1	ADP-ribosylation factor 1	Exemplar sequence	Hs.286221	375	NP_001019397 /// NP_001019398 /// NP_001019399 /// NP_001649	NM_001024226 /// NM_001024227 /// NM_001024228 /// NM_001658
232175_PM_at	232175_at	ARF1	ADP-ribosylation factor 1	Consensus sequence	Hs.286221	375	NP_001019397 /// NP_001019398 /// NP_001019399 /// NP_001649	NM_001024226 /// NM_001024227 /// NM_001024228 /// NM_001658
1565651_PM_at	1565651_at	ARF1	ADP-ribosylation factor 1	Consensus sequence	Hs.286221	375	NP_001019397 /// NP_001019398 /// NP_001019399 /// NP_001649	NM_001024226 /// NM_001024227 /// NM_001024228 /// NM_001658
211622_PM_s_at	211622_s_at	ARF3	ADP-ribosylation factor 3	Exemplar sequence	Hs.119177	377	NP_001650	NM_001659
200011_PM_s_at	200011_s_at	ARF3	ADP-ribosylation factor 3	Exemplar sequence	Hs.119177	377	NP_001650	NM_001659
200734_PM_s_at	200734_s_at	ARF3	ADP-ribosylation factor 3	Consensus sequence	Hs.119177	377	NP_001650	NM_001659
201097_PM_s_at	201097_s_at	ARF4	ADP-ribosylation factor 4	Exemplar sequence	Hs.652183	378	NP_001651	NM_001660
201096_PM_s_at	201096_s_at	ARF4	ADP-ribosylation factor 4	Consensus sequence	Hs.652183	378	NP_001651	NM_001660
201526_PM_at	201526_at	ARF5	ADP-ribosylation factor 5	Exemplar sequence	Hs.653202	381	NP_001653	NM_001662
224788_PM_at	224788_at	ARF6	ADP-ribosylation factor 6	Consensus sequence	Hs.525330	382	NP_001654	NM_001663
203312_PM_x_at	203312_x_at	ARF6	ADP-ribosylation factor 6	Exemplar sequence	Hs.525330	382	NP_001654	NM_001663
203311_PM_s_at	203311_s_at	ARF6	ADP-ribosylation factor 6	Exemplar sequence	Hs.525330	382	NP_001654	NM_001663
234001_PM_s_at	234001_s_at	ARFGAP1	ADP-ribosylation factor GTPase activating protein 1	Consensus sequence	Hs.724461	55738	NP_060679 /// NP_783202	NM_018209 /// NM_175609
217888_PM_s_at	217888_s_at	ARFGAP1	ADP-ribosylation factor GTPase activating protein 1	Exemplar sequence	Hs.724461	55738	NP_060679 /// NP_783202	NM_018209 /// NM_175609
211975_PM_at	211975_at	ARFGAP2	ADP-ribosylation factor GTPase activating protein 2	Consensus sequence	Hs.436204	84364	NP_115765	NM_032389
202211_PM_at	202211_at	ARFGAP3	ADP-ribosylation factor GTPase activating protein 3	Exemplar sequence	Hs.685225	26286	NP_001135765 /// NP_055385	NM_001142293 /// NM_014570
216266_PM_s_at	216266_s_at	ARFGEF1	ADP-ribosylation factor guanine nucleotide-exchange factor 1(brefeldin A-inhibited)	Consensus sequence	Hs.656902	10565	NP_006412	NM_006421
202955_PM_s_at	202955_s_at	ARFGEF1	ADP-ribosylation factor guanine nucleotide-exchange factor 1(brefeldin A-inhibited)	Exemplar sequence	Hs.656902	10565	NP_006412	NM_006421
202956_PM_at	202956_at	ARFGEF1	ADP-ribosylation factor guanine nucleotide-exchange factor 1(brefeldin A-inhibited)	Exemplar sequence	Hs.656902	10565	NP_006412	NM_006421
218098_PM_at	218098_at	ARFGEF2	ADP-ribosylation factor guanine nucleotide-exchange factor 2 (brefeldin A-inhibited)	Consensus sequence	Hs.62578	10564	NP_006411	NM_006420
222518_PM_at	222518_at	ARFGEF2	ADP-ribosylation factor guanine nucleotide-exchange factor 2 (brefeldin A-inhibited)	Consensus sequence	Hs.62578	10564	NP_006411	NM_006420
215927_PM_at	215927_at	ARFGEF2	ADP-ribosylation factor guanine nucleotide-exchange factor 2 (brefeldin A-inhibited)	Consensus sequence	Hs.62578	10564	NP_006411	NM_006420
215931_PM_s_at	215931_s_at	ARFGEF2	ADP-ribosylation factor guanine nucleotide-exchange factor 2 (brefeldin A-inhibited)	Consensus sequence	Hs.62578	10564	NP_006411	NM_006420
218230_PM_at	218230_at	ARFIP1	ADP-ribosylation factor interacting protein 1	Consensus sequence	Hs.416089	27236	NP_001020764 /// NP_001020766 /// NP_055262	NM_001025593 /// NM_001025595 /// NM_014447
214483_PM_s_at	214483_s_at	ARFIP1	ADP-ribosylation factor interacting protein 1	Consensus sequence	Hs.416089	27236	NP_001020764 /// NP_001020766 /// NP_055262	NM_001025593 /// NM_001025595 /// NM_014447
202109_PM_at	202109_at	ARFIP2	ADP-ribosylation factor interacting protein 2	Exemplar sequence	Hs.75139	23647	NP_036534	NM_012402
215984_PM_s_at	215984_s_at	ARFRP1	ADP-ribosylation factor related protein 1	Consensus sequence	Hs.389277	10139	NP_001128230 /// NP_003215	NM_001134758 /// NM_003224
203174_PM_s_at	203174_s_at	ARFRP1	ADP-ribosylation factor related protein 1	Exemplar sequence	Hs.389277	10139	NP_001128230 /// NP_003215	NM_001134758 /// NM_003224
231665_PM_at	231665_at	ARG1	Arginase, liver	Consensus sequence	Hs.440934	383	NP_000036	NM_000045
231663_PM_s_at	231663_s_at	ARG1	Arginase, liver	Consensus sequence	Hs.440934	383	NP_000036	NM_000045
231662_PM_at	231662_at	ARG1	Arginase, liver	Consensus sequence	Hs.440934	383	NP_000036	NM_000045
206177_PM_s_at	206177_s_at	ARG1	arginase, liver	Exemplar sequence	Hs.440934	383	NP_000036	NM_000045
203946_PM_s_at	203946_s_at	ARG2	arginase, type II	Exemplar sequence	Hs.723133	384	NP_001163	NM_001172
203945_PM_at	203945_at	ARG2	arginase, type II	Exemplar sequence	Hs.723133	384	NP_001163	NM_001172
227448_PM_at	227448_at	ARGLU1	arginine and glutamate rich 1	Consensus sequence	Hs.724380	55082	NP_060481	NM_018011
228477_PM_at	228477_at	ARGLU1	arginine and glutamate rich 1	Consensus sequence	Hs.724380	55082	NP_060481	NM_018011
218067_PM_s_at	218067_s_at	ARGLU1	arginine and glutamate rich 1	Exemplar sequence	Hs.724380	55082	NP_060481	NM_018011
222508_PM_s_at	222508_s_at	ARGLU1	arginine and glutamate rich 1	Consensus sequence	Hs.724380	55082	NP_060481	NM_018011
202117_PM_at	202117_at	ARHGAP1	Rho GTPase activating protein 1	Consensus sequence	Hs.138860	392	NP_004299	NM_004308
216689_PM_x_at	216689_x_at	ARHGAP1	Rho GTPase activating protein 1	Consensus sequence	Hs.138860	392	NP_004299	NM_004308
217153_PM_at	217153_at	ARHGAP1	Rho GTPase activating protein 1	Consensus sequence	Hs.138860	392	NP_004299	NM_004308
241419_PM_at	241419_at	ARHGAP1	Rho GTPase activating protein 1	Consensus sequence	Hs.138860	392	NP_004299	NM_004308
219431_PM_at	219431_at	ARHGAP10	Rho GTPase activating protein 10	Exemplar sequence	Hs.368631	79658	NP_078881	NM_024605
204492_PM_at	204492_at	ARHGAP11A	Rho GTPase activating protein 11A	Exemplar sequence	Hs.591130	9824	NP_055598 /// NP_955389	NM_014783 /// NM_199357
207606_PM_s_at	207606_s_at	ARHGAP12	Rho GTPase activating protein 12	Exemplar sequence	Hs.499264	94134	NP_060757	NM_018287
218870_PM_at	218870_at	ARHGAP15	Rho GTPase activating protein 15	Exemplar sequence	Hs.171011	55843	NP_060930	NM_018460
218076_PM_s_at	218076_s_at	ARHGAP17	Rho GTPase activating protein 17	Exemplar sequence	Hs.373793	55114	NP_001006635 /// NP_060524	NM_001006634 /// NM_018054
225171_PM_at	225171_at	ARHGAP18	Rho GTPase activating protein 18	Consensus sequence	Hs.486458	93663	NP_277050	NM_033515
225166_PM_at	225166_at	ARHGAP18	Rho GTPase activating protein 18	Consensus sequence	Hs.486458	93663	NP_277050	NM_033515
225173_PM_at	225173_at	ARHGAP18	Rho GTPase activating protein 18	Consensus sequence	Hs.486458	93663	NP_277050	NM_033515
37577_PM_at	37577_at	ARHGAP19	Rho GTPase activating protein 19	Consensus sequence	Hs.80305	84986	NP_116289	NM_032900
212738_PM_at	212738_at	ARHGAP19	Rho GTPase activating protein 19	Consensus sequence	Hs.80305	84986	NP_116289	NM_032900
1555020_PM_a_at	1555020_a_at	ARHGAP20	Rho GTPase activating protein 20	Consensus sequence	Hs.6136	57569	NP_065860	NM_020809
228368_PM_at	228368_at	ARHGAP20	Rho GTPase activating protein 20	Consensus sequence	Hs.6136	57569	NP_065860	NM_020809
224764_PM_at	224764_at	ARHGAP21	Rho GTPase activating protein 21	Consensus sequence	Hs.524195	57584	NP_065875	NM_020824
241701_PM_at	241701_at	ARHGAP21	Rho GTPase activating protein 21	Consensus sequence	Hs.524195	57584	NP_065875	NM_020824
1560765_PM_a_at	1560765_a_at	ARHGAP22	Rho GTPase activating protein 22	Consensus sequence	Hs.655672	58504	NP_067049	NM_021226
1560821_PM_at	1560821_at	ARHGAP22	Rho GTPase activating protein 22	Consensus sequence	Hs.655672	58504	NP_067049	NM_021226
206298_PM_at	206298_at	ARHGAP22	Rho GTPase activating protein 22	Exemplar sequence	Hs.655672	58504	NP_067049	NM_021226
1560764_PM_at	1560764_at	ARHGAP22	Rho GTPase activating protein 22	Consensus sequence	Hs.655672	58504	NP_067049	NM_021226
230196_PM_x_at	230196_x_at	ARHGAP23	Rho GTPase activating protein 23	Consensus sequence	Hs.374446	57636	NP_065927	NM_020876
231903_PM_x_at	231903_x_at	ARHGAP23	Rho GTPase activating protein 23	Consensus sequence	Hs.374446	57636	NP_065927	NM_020876
230013_PM_s_at	230013_s_at	ARHGAP23	Rho GTPase activating protein 23	Consensus sequence	Hs.374446	57636	NP_065927	NM_020876
226638_PM_at	226638_at	ARHGAP23	Rho GTPase activating protein 23	Consensus sequence	Hs.374446	57636	NP_065927	NM_020876
230802_PM_at	230802_at	ARHGAP24	Rho GTPase activating protein 24	Consensus sequence	Hs.444229	83478	NP_001020787 /// NP_001036134 /// NP_112595	NM_001025616 /// NM_001042669 /// NM_031305
230803_PM_s_at	230803_s_at	ARHGAP24	Rho GTPase activating protein 24	Consensus sequence	Hs.444229	83478	NP_001020787 /// NP_001036134 /// NP_112595	NM_001025616 /// NM_001042669 /// NM_031305
223422_PM_s_at	223422_s_at	ARHGAP24	Rho GTPase activating protein 24	Consensus sequence	Hs.444229	83478	NP_001020787 /// NP_001036134 /// NP_112595	NM_001025616 /// NM_001042669 /// NM_031305
221030_PM_s_at	221030_s_at	ARHGAP24	Rho GTPase activating protein 24	Exemplar sequence	Hs.444229	83478	NP_001020787 /// NP_001036134 /// NP_112595	NM_001025616 /// NM_001042669 /// NM_031305
204882_PM_at	204882_at	ARHGAP25	Rho GTPase activating protein 25	Exemplar sequence	Hs.531807	9938	NP_001007232 /// NP_001159748 /// NP_001159749 /// NP_055697	NM_001007231 /// NM_001166276 /// NM_001166277 /// NM_014882
38149_PM_at	38149_at	ARHGAP25	Rho GTPase activating protein 25	Consensus sequence	Hs.531807	9938	NP_001007232 /// NP_001159748 /// NP_001159749 /// NP_055697	NM_001007231 /// NM_001166276 /// NM_001166277 /// NM_014882
1555076_PM_at	1555076_at	ARHGAP25	Rho GTPase activating protein 25	Consensus sequence	Hs.531807	9938	NP_001007232 /// NP_001159748 /// NP_001159749 /// NP_055697	NM_001007231 /// NM_001166276 /// NM_001166277 /// NM_014882
205068_PM_s_at	205068_s_at	ARHGAP26	Rho GTPase activating protein 26	Consensus sequence	Hs.654668	23092	NP_001129080 /// NP_055886	NM_001135608 /// NM_015071
205069_PM_s_at	205069_s_at	ARHGAP26	Rho GTPase activating protein 26	Exemplar sequence	Hs.654668	23092	NP_001129080 /// NP_055886	NM_001135608 /// NM_015071
226576_PM_at	226576_at	ARHGAP26	Rho GTPase activating protein 26	Consensus sequence	Hs.654668	23092	NP_001129080 /// NP_055886	NM_001135608 /// NM_015071
215955_PM_x_at	215955_x_at	ARHGAP26	Rho GTPase activating protein 26	Consensus sequence	Hs.654668	23092	NP_001129080 /// NP_055886	NM_001135608 /// NM_015071
225618_PM_at	225618_at	ARHGAP27	Rho GTPase activating protein 27	Consensus sequence	Hs.721398	201176	NP_001152802 /// NP_954976	NM_001159330 /// NM_199282
227057_PM_at	227057_at	ARHGAP27	Rho GTPase activating protein 27	Consensus sequence	Hs.721398	201176	NP_001152802 /// NP_954976	NM_001159330 /// NM_199282
227911_PM_at	227911_at	ARHGAP28	Rho GTPase activating protein 28	Consensus sequence	Hs.183114	79822	NP_001010000 /// NP_109597	NM_001010000 /// NM_030672
220381_PM_at	220381_at	ARHGAP28	Rho GTPase activating protein 28	Exemplar sequence	Hs.183114	79822	NP_001010000 /// NP_109597	NM_001010000 /// NM_030672
220382_PM_s_at	220382_s_at	ARHGAP28	Rho GTPase activating protein 28	Exemplar sequence	Hs.183114	79822	NP_001010000 /// NP_109597	NM_001010000 /// NM_030672
203910_PM_at	203910_at	ARHGAP29	Rho GTPase activating protein 29	Exemplar sequence	Hs.483238	9411	NP_004806	NM_004815
1560318_PM_at	1560318_at	ARHGAP29	Rho GTPase activating protein 29	Consensus sequence	Hs.483238	9411	NP_004806	NM_004815
1554736_PM_at	1554736_at	ARHGAP29	Rho GTPase activating protein 29	Consensus sequence	Hs.483238	9411	NP_004806	NM_004815
1558280_PM_s_at	1558280_s_at	ARHGAP29	Rho GTPase activating protein 29	Consensus sequence	Hs.483238	9411	NP_004806	NM_004815
226219_PM_at	226219_at	ARHGAP30	Rho GTPase activating protein 30	Consensus sequence	Hs.389374	257106	NP_001020769 /// NP_859071	NM_001025598 /// NM_181720
241346_PM_at	241346_at	ARHGAP30	Rho GTPase activating protein 30	Consensus sequence	Hs.389374	257106	NP_001020769 /// NP_859071	NM_001025598 /// NM_181720
226057_PM_at	226057_at	ARHGAP31	Rho GTPase activating protein 31	Consensus sequence	Hs.668218	57514	NP_065805	NM_020754
226056_PM_at	226056_at	ARHGAP31	Rho GTPase activating protein 31	Consensus sequence	Hs.668218	57514	NP_065805	NM_020754
242196_PM_at	242196_at	ARHGAP32	Rho GTPase activating protein 32	Consensus sequence	Hs.440379	9743	NP_001136157 /// NP_055530	NM_001142685 /// NM_014715
229648_PM_at	229648_at	ARHGAP32	Rho GTPase activating protein 32	Consensus sequence	Hs.440379	9743	NP_001136157 /// NP_055530	NM_001142685 /// NM_014715
203431_PM_s_at	203431_s_at	ARHGAP32	Rho GTPase activating protein 32	Exemplar sequence	Hs.440379	9743	NP_001136157 /// NP_055530	NM_001142685 /// NM_014715
210791_PM_s_at	210791_s_at	ARHGAP32	Rho GTPase activating protein 32	Exemplar sequence	Hs.440379	9743	NP_001136157 /// NP_055530	NM_001142685 /// NM_014715
233885_PM_at	233885_at	ARHGAP33	Rho GTPase activating protein 33	Consensus sequence	Hs.515364	115703	NP_001166101 /// NP_443180	NM_001172630 /// NM_052948
213827_PM_at	213827_at	ARHGAP33	Rho GTPase activating protein 33	Consensus sequence	Hs.515364	115703	NP_001166101 /// NP_443180	NM_001172630 /// NM_052948
215256_PM_x_at	215256_x_at	ARHGAP33	Rho GTPase activating protein 33	Consensus sequence	Hs.515364	115703	NP_001166101 /// NP_443180	NM_001172630 /// NM_052948
238047_PM_at	238047_at	ARHGAP36	Rho GTPase activating protein 36	Consensus sequence	Hs.22905	158763	NP_659404	NM_144967
227876_PM_at	227876_at	ARHGAP39	Rho GTPase activating protein 39	Consensus sequence	Hs.148988	80728	NP_079527	NM_025251
204425_PM_at	204425_at	ARHGAP4	Rho GTPase activating protein 4	Exemplar sequence	Hs.701324	393	NP_001158213 /// NP_001657	NM_001164741 /// NM_001666
230047_PM_at	230047_at	ARHGAP42	Rho GTPase activating protein 42	Consensus sequence	Hs.269837	143872	NP_689645	NM_152432
1553383_PM_at	1553383_at	ARHGAP42	Rho GTPase activating protein 42	Consensus sequence	Hs.269837	143872	NP_689645	NM_152432
235635_PM_at	235635_at	ARHGAP5	Rho GTPase activating protein 5	Consensus sequence	Hs.592313	394	NP_001025226 /// NP_001164	NM_001030055 /// NM_001173
217936_PM_at	217936_at	ARHGAP5	Rho GTPase activating protein 5	Consensus sequence	Hs.592313	394	NP_001025226 /// NP_001164	NM_001030055 /// NM_001173
233872_PM_x_at	233872_x_at	ARHGAP5	Rho GTPase activating protein 5	Consensus sequence	Hs.592313	394	NP_001025226 /// NP_001164	NM_001030055 /// NM_001173
1552627_PM_a_at	1552627_a_at	ARHGAP5	Rho GTPase activating protein 5	Consensus sequence	Hs.592313	394	NP_001025226 /// NP_001164	NM_001030055 /// NM_001173
233849_PM_s_at	233849_s_at	ARHGAP5	Rho GTPase activating protein 5	Consensus sequence	Hs.592313	394	NP_001025226 /// NP_001164	NM_001030055 /// NM_001173
208085_PM_s_at	208085_s_at	ARHGAP6	Rho GTPase activating protein 6	Exemplar sequence	Hs.435291	395	NP_006116 /// NP_038267 /// NP_038286	NM_006125 /// NM_013423 /// NM_013427
206167_PM_s_at	206167_s_at	ARHGAP6	Rho GTPase activating protein 6	Exemplar sequence	Hs.435291	395	NP_006116 /// NP_038267 /// NP_038286	NM_006125 /// NM_013423 /// NM_013427
232567_PM_at	232567_at	ARHGAP8	Rho GTPase activating protein 8	Consensus sequence	Hs.720401	23779	NP_001017526 /// NP_851852	NM_001017526 /// NM_181335
205980_PM_s_at	205980_s_at	ARHGAP8 /// PRR5 /// PRR5-ARHGAP8	Rho GTPase activating protein 8 /// proline rich 5 (renal) /// PRR5-ARHGAP8 readthrough	Exemplar sequence	Hs.720401	23779 /// 553158 /// 55615	NP_001017526 /// NP_001017528 /// NP_001017529 /// NP_001017530 /// NP_056181 /// NP_851850 /// NP_851851 /// NP_851852	NM_001017526 /// NM_001017528 /// NM_001017529 /// NM_001017530 /// NM_015366 /// NM_181333 /// NM_181334 /// NM_181335
37117_PM_at	37117_at	ARHGAP8 /// PRR5 /// PRR5-ARHGAP8	Rho GTPase activating protein 8 /// proline rich 5 (renal) /// PRR5-ARHGAP8 readthrough	Consensus sequence	Hs.720401	23779 /// 553158 /// 55615	NP_001017526 /// NP_001017528 /// NP_001017529 /// NP_001017530 /// NP_056181 /// NP_851850 /// NP_851851 /// NP_851852	NM_001017526 /// NM_001017528 /// NM_001017529 /// NM_001017530 /// NM_015366 /// NM_181333 /// NM_181334 /// NM_181335
226906_PM_s_at	226906_s_at	ARHGAP9	Rho GTPase activating protein 9	Consensus sequence	Hs.437126	64333	NP_001073625 /// NP_001073626 /// NP_115885	NM_001080156 /// NM_001080157 /// NM_032496
232543_PM_x_at	232543_x_at	ARHGAP9	Rho GTPase activating protein 9	Consensus sequence	Hs.437126	64333	NP_001073625 /// NP_001073626 /// NP_115885	NM_001080156 /// NM_001080157 /// NM_032496
224451_PM_x_at	224451_x_at	ARHGAP9	Rho GTPase activating protein 9	Exemplar sequence	Hs.437126	64333	NP_001073625 /// NP_001073626 /// NP_115885	NM_001080156 /// NM_001080157 /// NM_032496
211716_PM_x_at	211716_x_at	ARHGDIA	Rho GDP dissociation inhibitor (GDI) alpha	Exemplar sequence	Hs.159161	396	NP_004300	NM_004309
213606_PM_s_at	213606_s_at	ARHGDIA	Rho GDP dissociation inhibitor (GDI) alpha	Consensus sequence	Hs.159161	396	NP_004300	NM_004309
201167_PM_x_at	201167_x_at	ARHGDIA	Rho GDP dissociation inhibitor (GDI) alpha	Exemplar sequence	Hs.159161	396	NP_004300	NM_004309
201168_PM_x_at	201168_x_at	ARHGDIA	Rho GDP dissociation inhibitor (GDI) alpha	Exemplar sequence	Hs.159161	396	NP_004300	NM_004309
1555811_PM_at	1555811_at	ARHGDIB	Rho GDP dissociation inhibitor (GDI) beta	Consensus sequence	Hs.504877	397	NP_001166	NM_001175
201288_PM_at	201288_at	ARHGDIB	Rho GDP dissociation inhibitor (GDI) beta	Exemplar sequence	Hs.504877	397	NP_001166	NM_001175
1555812_PM_a_at	1555812_a_at	ARHGDIB	Rho GDP dissociation inhibitor (GDI) beta	Consensus sequence	Hs.504877	397	NP_001166	NM_001175
206888_PM_s_at	206888_s_at	ARHGDIG	Rho GDP dissociation inhibitor (GDI) gamma	Exemplar sequence	Hs.647388	398	NP_001167	NM_001176
1560445_PM_x_at	1560445_x_at	ARHGEF1	Rho guanine nucleotide exchange factor (GEF) 1	Consensus sequence	Hs.631550	9138	NP_004697 /// NP_945328 /// NP_945353	NM_004706 /// NM_198977 /// NM_199002
203055_PM_s_at	203055_s_at	ARHGEF1	Rho guanine nucleotide exchange factor (GEF) 1	Exemplar sequence	Hs.631550	9138	NP_004697 /// NP_945328 /// NP_945353	NM_004706 /// NM_198977 /// NM_199002
1554213_PM_at	1554213_at	ARHGEF10	Rho guanine nucleotide exchange factor (GEF) 10	Consensus sequence	Hs.98594	9639	NP_055444	NM_014629
215139_PM_at	215139_at	ARHGEF10	Rho guanine nucleotide exchange factor (GEF) 10	Consensus sequence	Hs.98594	9639	NP_055444	NM_014629
1554703_PM_at	1554703_at	ARHGEF10	Rho guanine nucleotide exchange factor (GEF) 10	Consensus sequence	Hs.98594	9639	NP_055444	NM_014629
216620_PM_s_at	216620_s_at	ARHGEF10	Rho guanine nucleotide exchange factor (GEF) 10	Consensus sequence	Hs.98594	9639	NP_055444	NM_014629
1570511_PM_at	1570511_at	ARHGEF10L	Rho guanine nucleotide exchange factor (GEF) 10-like	Consensus sequence	Hs.443460	55160	NP_001011722 /// NP_060595	NM_001011722 /// NM_018125
221656_PM_s_at	221656_s_at	ARHGEF10L	Rho guanine nucleotide exchange factor (GEF) 10-like	Exemplar sequence	Hs.443460	55160	NP_001011722 /// NP_060595	NM_001011722 /// NM_018125
238730_PM_at	238730_at	ARHGEF11	Rho guanine nucleotide exchange factor (GEF) 11	Consensus sequence	Hs.516954	9826	NP_055599 /// NP_937879	NM_014784 /// NM_198236
202913_PM_at	202913_at	ARHGEF11	Rho guanine nucleotide exchange factor (GEF) 11	Consensus sequence	Hs.516954	9826	NP_055599 /// NP_937879	NM_014784 /// NM_198236
202914_PM_s_at	202914_s_at	ARHGEF11	Rho guanine nucleotide exchange factor (GEF) 11	Exemplar sequence	Hs.516954	9826	NP_055599 /// NP_937879	NM_014784 /// NM_198236
210741_PM_at	210741_at	ARHGEF12	Rho guanine nucleotide exchange factor (GEF) 12	Exemplar sequence	Hs.24598	23365	NP_056128	NM_015313
201335_PM_s_at	201335_s_at	ARHGEF12	Rho guanine nucleotide exchange factor (GEF) 12	Exemplar sequence	Hs.24598	23365	NP_056128	NM_015313
233620_PM_at	233620_at	ARHGEF12	Rho guanine nucleotide exchange factor (GEF) 12	Consensus sequence	Hs.24598	23365	NP_056128	NM_015313
234129_PM_at	234129_at	ARHGEF12	Rho guanine nucleotide exchange factor (GEF) 12	Consensus sequence	Hs.24598	23365	NP_056128	NM_015313
233621_PM_s_at	233621_s_at	ARHGEF12	Rho guanine nucleotide exchange factor (GEF) 12	Consensus sequence	Hs.24598	23365	NP_056128	NM_015313
201334_PM_s_at	201334_s_at	ARHGEF12	Rho guanine nucleotide exchange factor (GEF) 12	Consensus sequence	Hs.24598	23365	NP_056128	NM_015313
1559833_PM_at	1559833_at	ARHGEF12	Rho guanine nucleotide exchange factor (GEF) 12	Consensus sequence	Hs.24598	23365	NP_056128	NM_015313
234542_PM_at	234542_at	ARHGEF12	Rho guanine nucleotide exchange factor (GEF) 12	Consensus sequence	Hs.24598	23365	NP_056128	NM_015313
1566093_PM_at	1566093_at	ARHGEF12	Rho guanine nucleotide exchange factor (GEF) 12	Consensus sequence	Hs.24598	23365	NP_056128	NM_015313
201333_PM_s_at	201333_s_at	ARHGEF12	Rho guanine nucleotide exchange factor (GEF) 12	Consensus sequence	Hs.24598	23365	NP_056128	NM_015313
1570471_PM_at	1570471_at	ARHGEF12	Rho guanine nucleotide exchange factor (GEF) 12	Consensus sequence	Hs.24598	23365	NP_056128	NM_015313
234544_PM_at	234544_at	ARHGEF12	Rho guanine nucleotide exchange factor (GEF) 12	Consensus sequence	Hs.24598	23365	NP_056128	NM_015313
234541_PM_s_at	234541_s_at	ARHGEF12	Rho guanine nucleotide exchange factor (GEF) 12	Consensus sequence	Hs.24598	23365	NP_056128	NM_015313
205507_PM_at	205507_at	ARHGEF15	Rho guanine nucleotide exchange factor (GEF) 15	Exemplar sequence	Hs.443109	22899	NP_776089	NM_173728
217348_PM_x_at	217348_x_at	ARHGEF15	Rho guanine nucleotide exchange factor (GEF) 15	Consensus sequence	Hs.443109	22899	NP_776089	NM_173728
208009_PM_s_at	208009_s_at	ARHGEF16	Rho guanine nucleotide exchange factor (GEF) 16	Exemplar sequence	Hs.87435	27237	NP_055263	NM_014448
203756_PM_at	203756_at	ARHGEF17	Rho guanine nucleotide exchange factor (GEF) 17	Exemplar sequence	Hs.533719	9828	NP_055601	NM_014786
213039_PM_at	213039_at	ARHGEF18	Rho/Rac guanine nucleotide exchange factor (GEF) 18	Consensus sequence	Hs.465761	23370	NP_001124427 /// NP_056133	NM_001130955 /// NM_015318
226857_PM_at	226857_at	ARHGEF19	Rho guanine nucleotide exchange factor (GEF) 19	Consensus sequence	Hs.591532	128272	NP_694945	NM_153213
1554783_PM_s_at	1554783_s_at	ARHGEF2	Rho/Rac guanine nucleotide exchange factor (GEF) 2	Consensus sequence	Hs.723917	9181	NP_001155855 /// NP_001155856 /// NP_004714	NM_001162383 /// NM_001162384 /// NM_004723
207629_PM_s_at	207629_s_at	ARHGEF2	Rho/Rac guanine nucleotide exchange factor (GEF) 2	Exemplar sequence	Hs.723917	9181	NP_001155855 /// NP_001155856 /// NP_004714	NM_001162383 /// NM_001162384 /// NM_004723
235595_PM_at	235595_at	ARHGEF2	Rho/Rac guanine nucleotide exchange factor (GEF) 2	Consensus sequence	Hs.723917	9181	NP_001155855 /// NP_001155856 /// NP_004714	NM_001162383 /// NM_001162384 /// NM_004723
209435_PM_s_at	209435_s_at	ARHGEF2	Rho/Rac guanine nucleotide exchange factor (GEF) 2	Exemplar sequence	Hs.723917	9181	NP_001155855 /// NP_001155856 /// NP_004714	NM_001162383 /// NM_001162384 /// NM_004723
218501_PM_at	218501_at	ARHGEF3	Rho guanine nucleotide exchange factor (GEF) 3	Exemplar sequence	Hs.476402	50650	NP_001122087 /// NP_001122088 /// NP_062455	NM_001128615 /// NM_001128616 /// NM_019555
241380_PM_at	241380_at	ARHGEF37	Rho guanine nucleotide exchange factor (GEF) 37	Consensus sequence	Hs.256206	389337	NP_001001669	NM_001001669
227717_PM_at	227717_at	ARHGEF37	Rho guanine nucleotide exchange factor (GEF) 37	Consensus sequence	Hs.256206	389337	NP_001001669	NM_001001669
221119_PM_at	221119_at	ARHGEF38	Rho guanine nucleotide exchange factor (GEF) 38	Exemplar sequence	Hs.675420	54848	NP_060170	NM_017700
211891_PM_s_at	211891_s_at	ARHGEF4	Rho guanine nucleotide exchange factor (GEF) 4	Exemplar sequence	Hs.469935	50649	NP_056135 /// NP_127462	NM_015320 /// NM_032995
205109_PM_s_at	205109_s_at	ARHGEF4	Rho guanine nucleotide exchange factor (GEF) 4	Exemplar sequence	Hs.469935	50649	NP_056135 /// NP_127462	NM_015320 /// NM_032995
216912_PM_at	216912_at	ARHGEF4	Rho guanine nucleotide exchange factor (GEF) 4	Consensus sequence	Hs.469935	50649	NP_056135 /// NP_127462	NM_015320 /// NM_032995
204765_PM_at	204765_at	ARHGEF5	Rho guanine nucleotide exchange factor (GEF) 5	Exemplar sequence	Hs.334	7984	NP_005426	NM_005435
209539_PM_at	209539_at	ARHGEF6	Rac/Cdc42 guanine nucleotide exchange factor (GEF) 6	Consensus sequence	Hs.522795	9459	NP_004831	NM_004840
235412_PM_at	235412_at	ARHGEF7	Rho guanine nucleotide exchange factor (GEF) 7	Consensus sequence	Hs.508738	8874	NP_001106983 /// NP_001106984 /// NP_001106985 /// NP_003890 /// NP_663788	NM_001113511 /// NM_001113512 /// NM_001113513 /// NM_003899 /// NM_145735
229642_PM_at	229642_at	ARHGEF7	Rho guanine nucleotide exchange factor (GEF) 7	Consensus sequence	Hs.508738	8874	NP_001106983 /// NP_001106984 /// NP_001106985 /// NP_003890 /// NP_663788	NM_001113511 /// NM_001113512 /// NM_001113513 /// NM_003899 /// NM_145735
242999_PM_at	242999_at	ARHGEF7	Rho guanine nucleotide exchange factor (GEF) 7	Consensus sequence	Hs.508738	8874	NP_001106983 /// NP_001106984 /// NP_001106985 /// NP_003890 /// NP_663788	NM_001113511 /// NM_001113512 /// NM_001113513 /// NM_003899 /// NM_145735
236416_PM_at	236416_at	ARHGEF7	Rho guanine nucleotide exchange factor (GEF) 7	Consensus sequence	Hs.508738	8874	NP_001106983 /// NP_001106984 /// NP_001106985 /// NP_003890 /// NP_663788	NM_001113511 /// NM_001113512 /// NM_001113513 /// NM_003899 /// NM_145735
202548_PM_s_at	202548_s_at	ARHGEF7	Rho guanine nucleotide exchange factor (GEF) 7	Exemplar sequence	Hs.508738	8874	NP_001106983 /// NP_001106984 /// NP_001106985 /// NP_003890 /// NP_663788	NM_001113511 /// NM_001113512 /// NM_001113513 /// NM_003899 /// NM_145735
1562270_PM_at	1562270_at	ARHGEF7	Rho guanine nucleotide exchange factor (GEF) 7	Consensus sequence	Hs.508738	8874	NP_001106983 /// NP_001106984 /// NP_001106985 /// NP_003890 /// NP_663788	NM_001113511 /// NM_001113512 /// NM_001113513 /// NM_003899 /// NM_145735
1562271_PM_x_at	1562271_x_at	ARHGEF7	Rho guanine nucleotide exchange factor (GEF) 7	Consensus sequence	Hs.508738	8874	NP_001106983 /// NP_001106984 /// NP_001106985 /// NP_003890 /// NP_663788	NM_001113511 /// NM_001113512 /// NM_001113513 /// NM_003899 /// NM_145735
202547_PM_s_at	202547_s_at	ARHGEF7	Rho guanine nucleotide exchange factor (GEF) 7	Consensus sequence	Hs.508738	8874	NP_001106983 /// NP_001106984 /// NP_001106985 /// NP_003890 /// NP_663788	NM_001113511 /// NM_001113512 /// NM_001113513 /// NM_003899 /// NM_145735
[truncated: 52,716 more rows]
